# Supplementary material
Source: MDPI journal article supplement (https://www.mdpi.com/2075-163X/11/9/955)
Supplement: s1 [file s1]

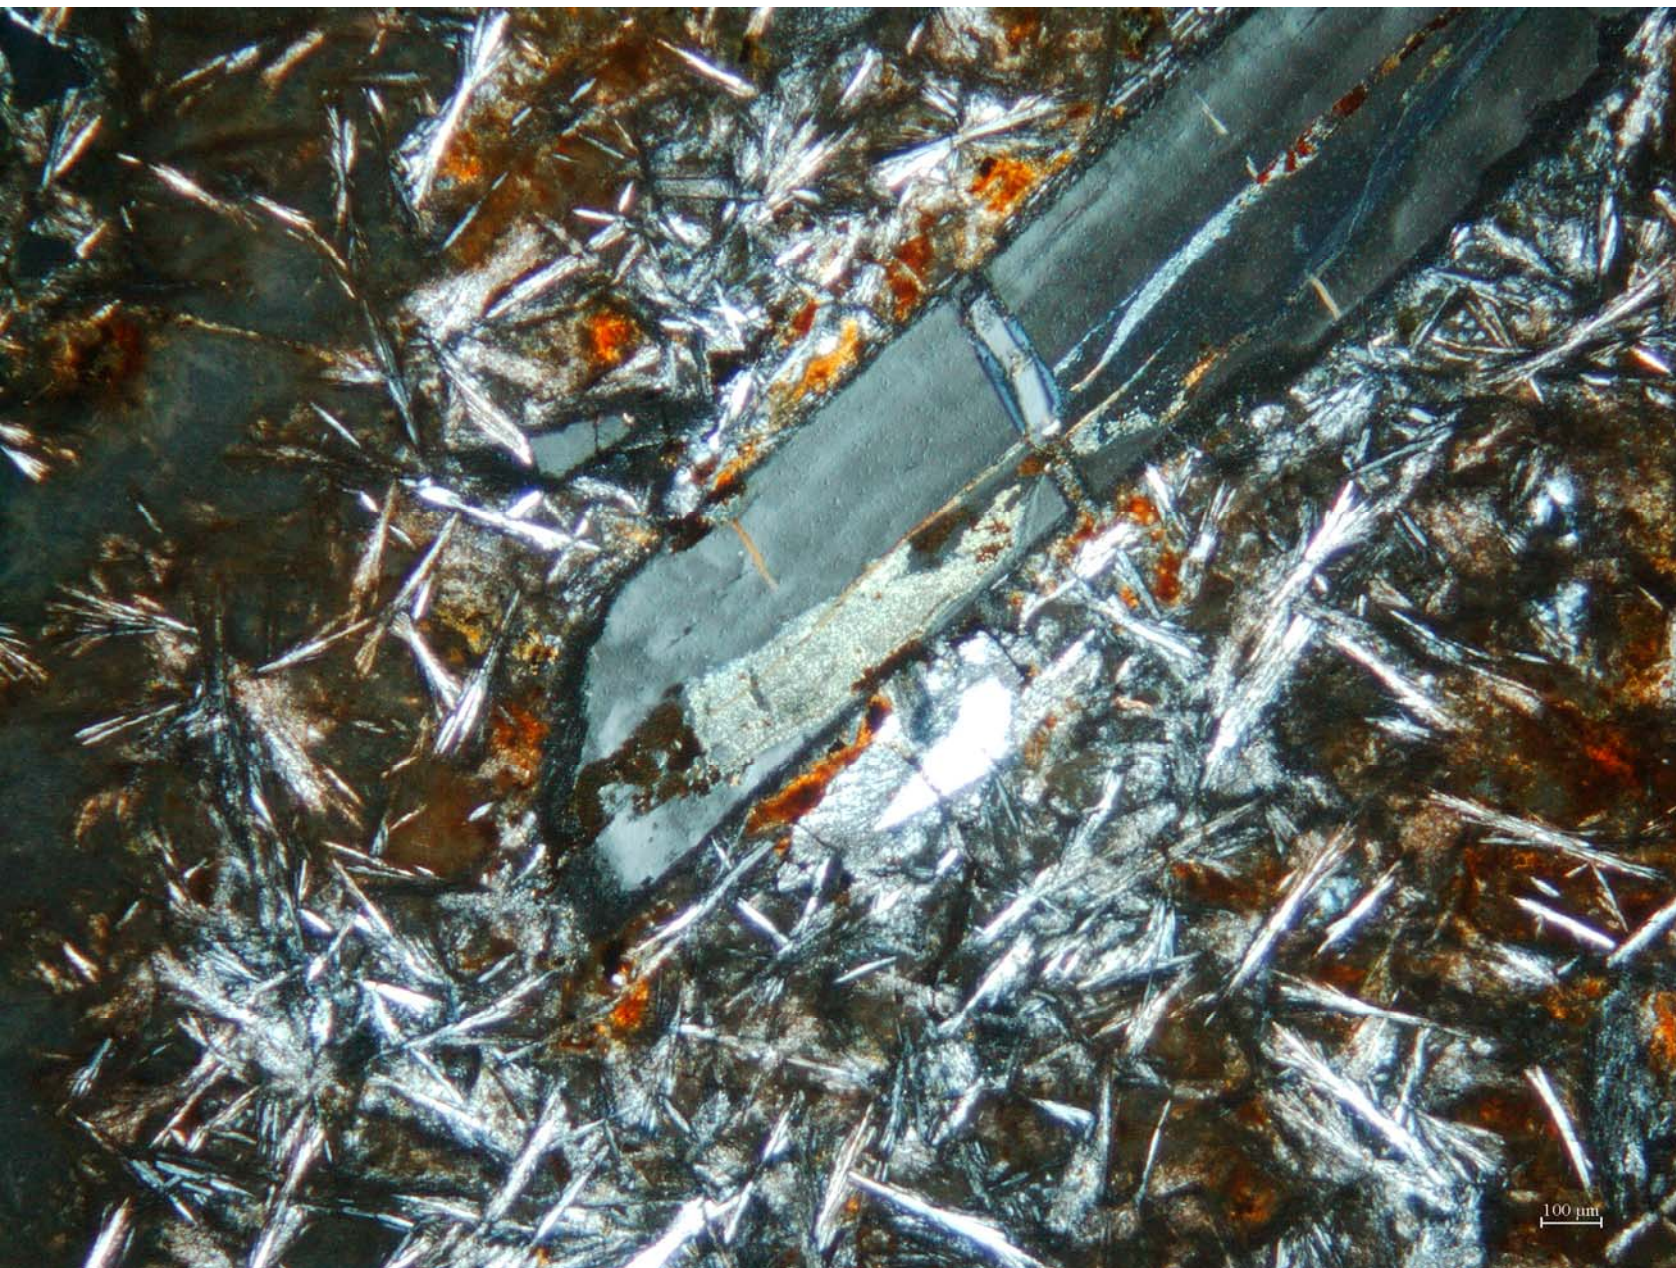

MEGT0301 - c1\_1

cross polarized light



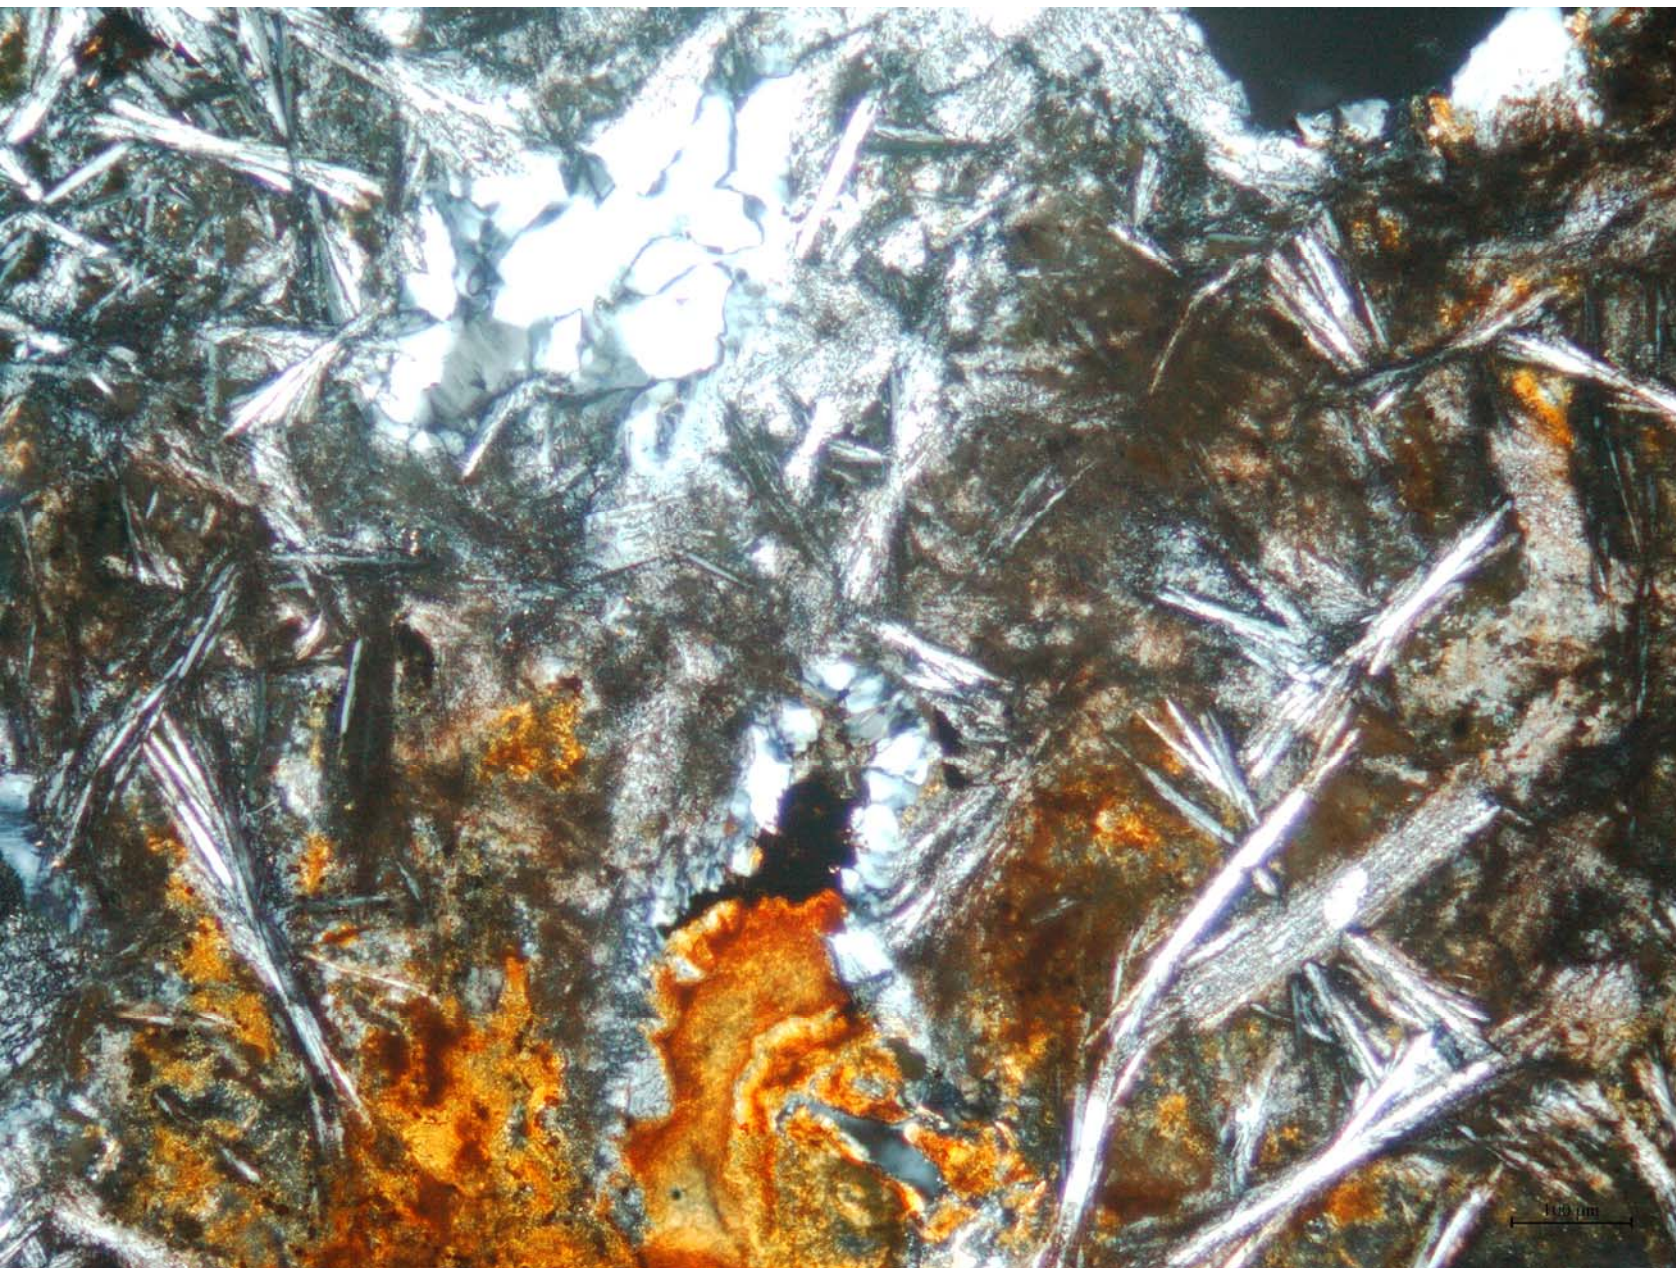

MEGT0301 - c2\_2

cross polarized light



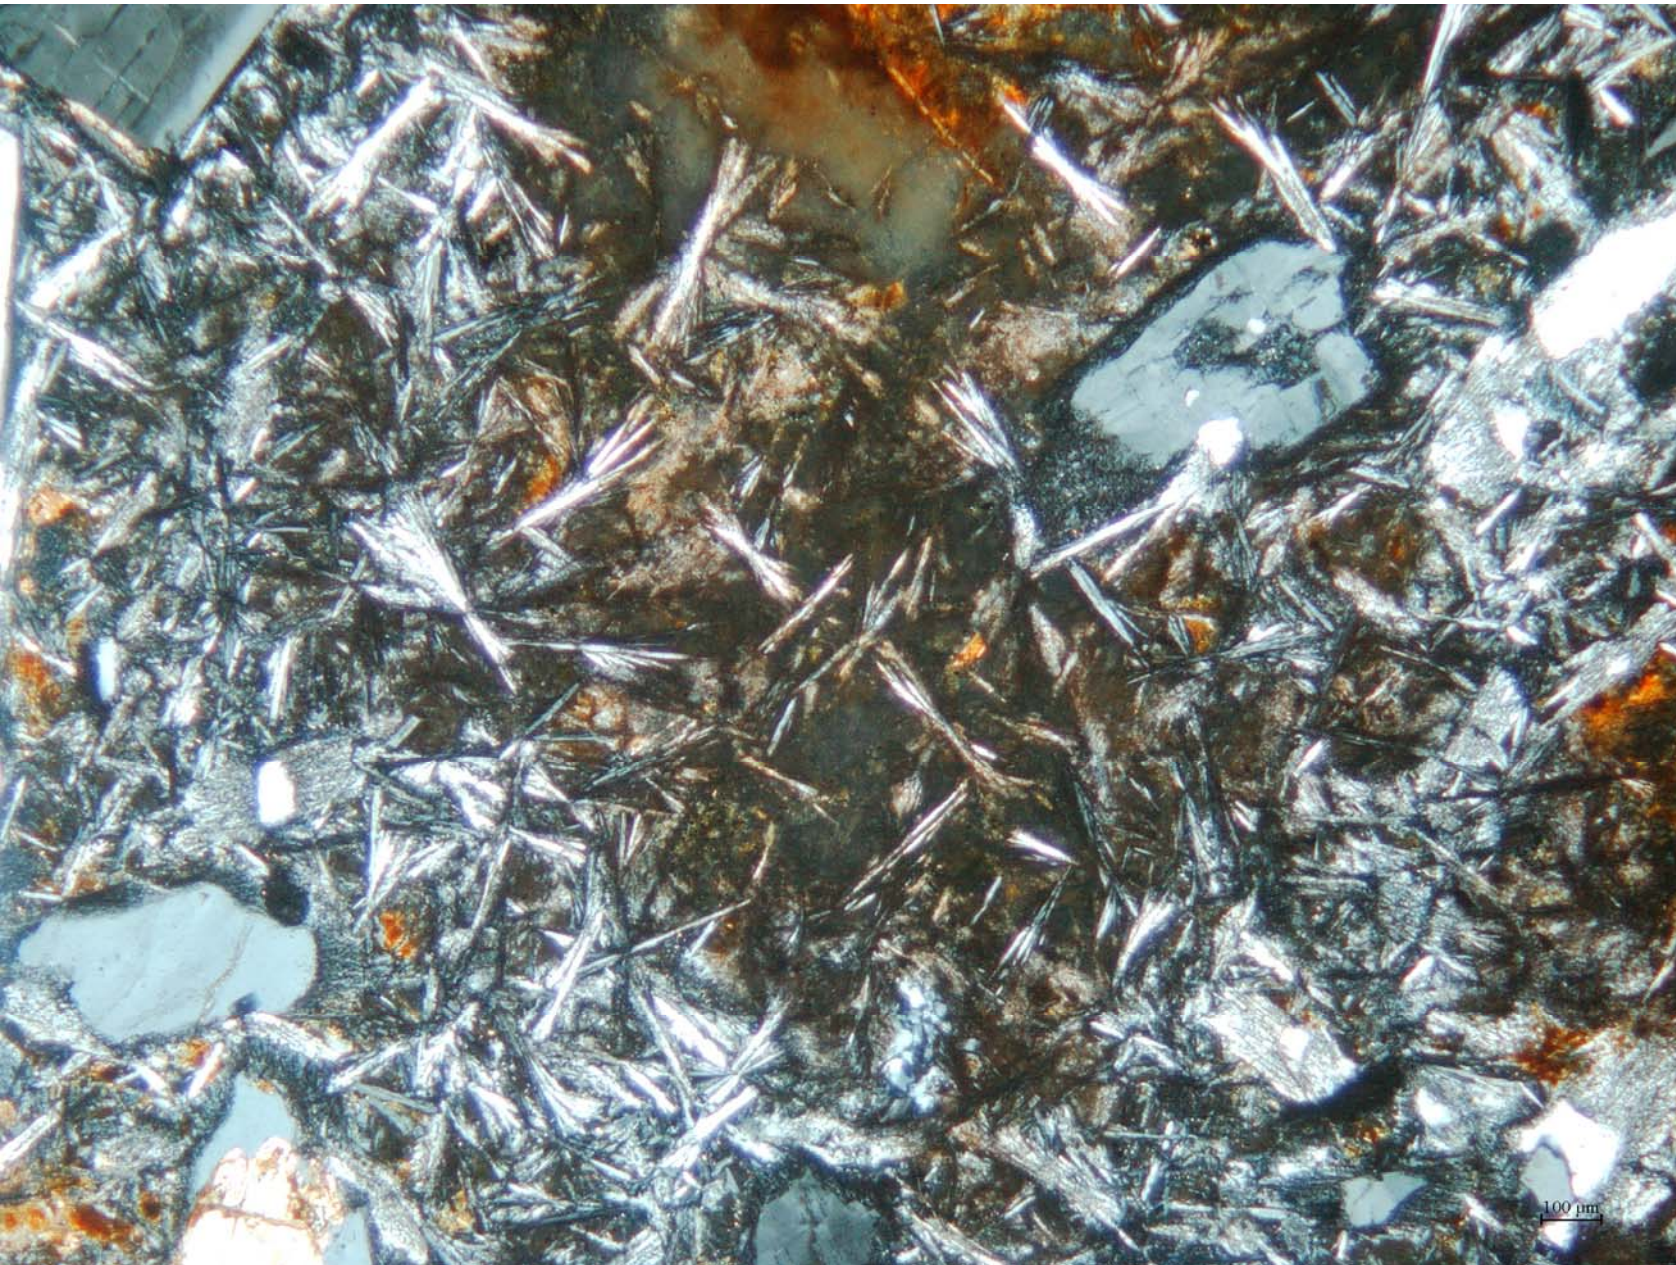

MEGT0301 – c2\_3

cross polarized light



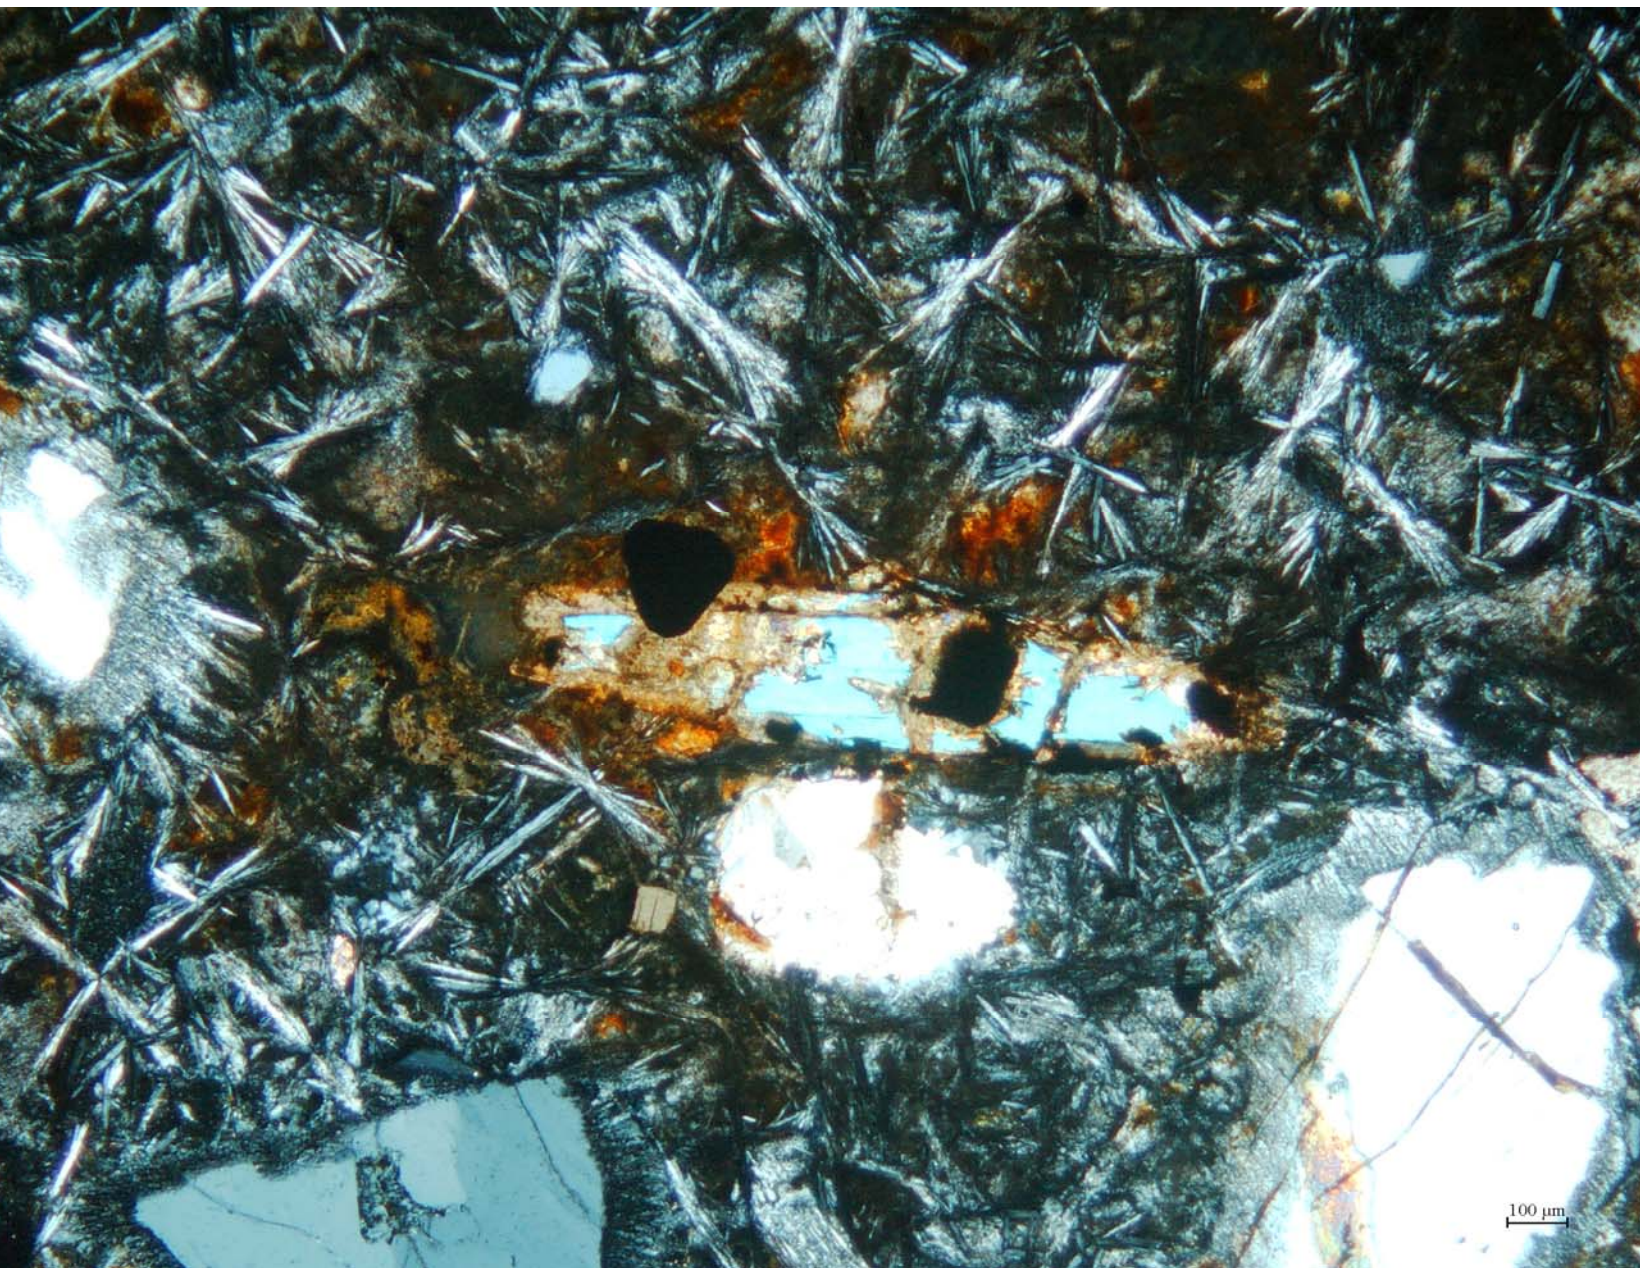

MEGT0301 - c3\_1

cross polarized light



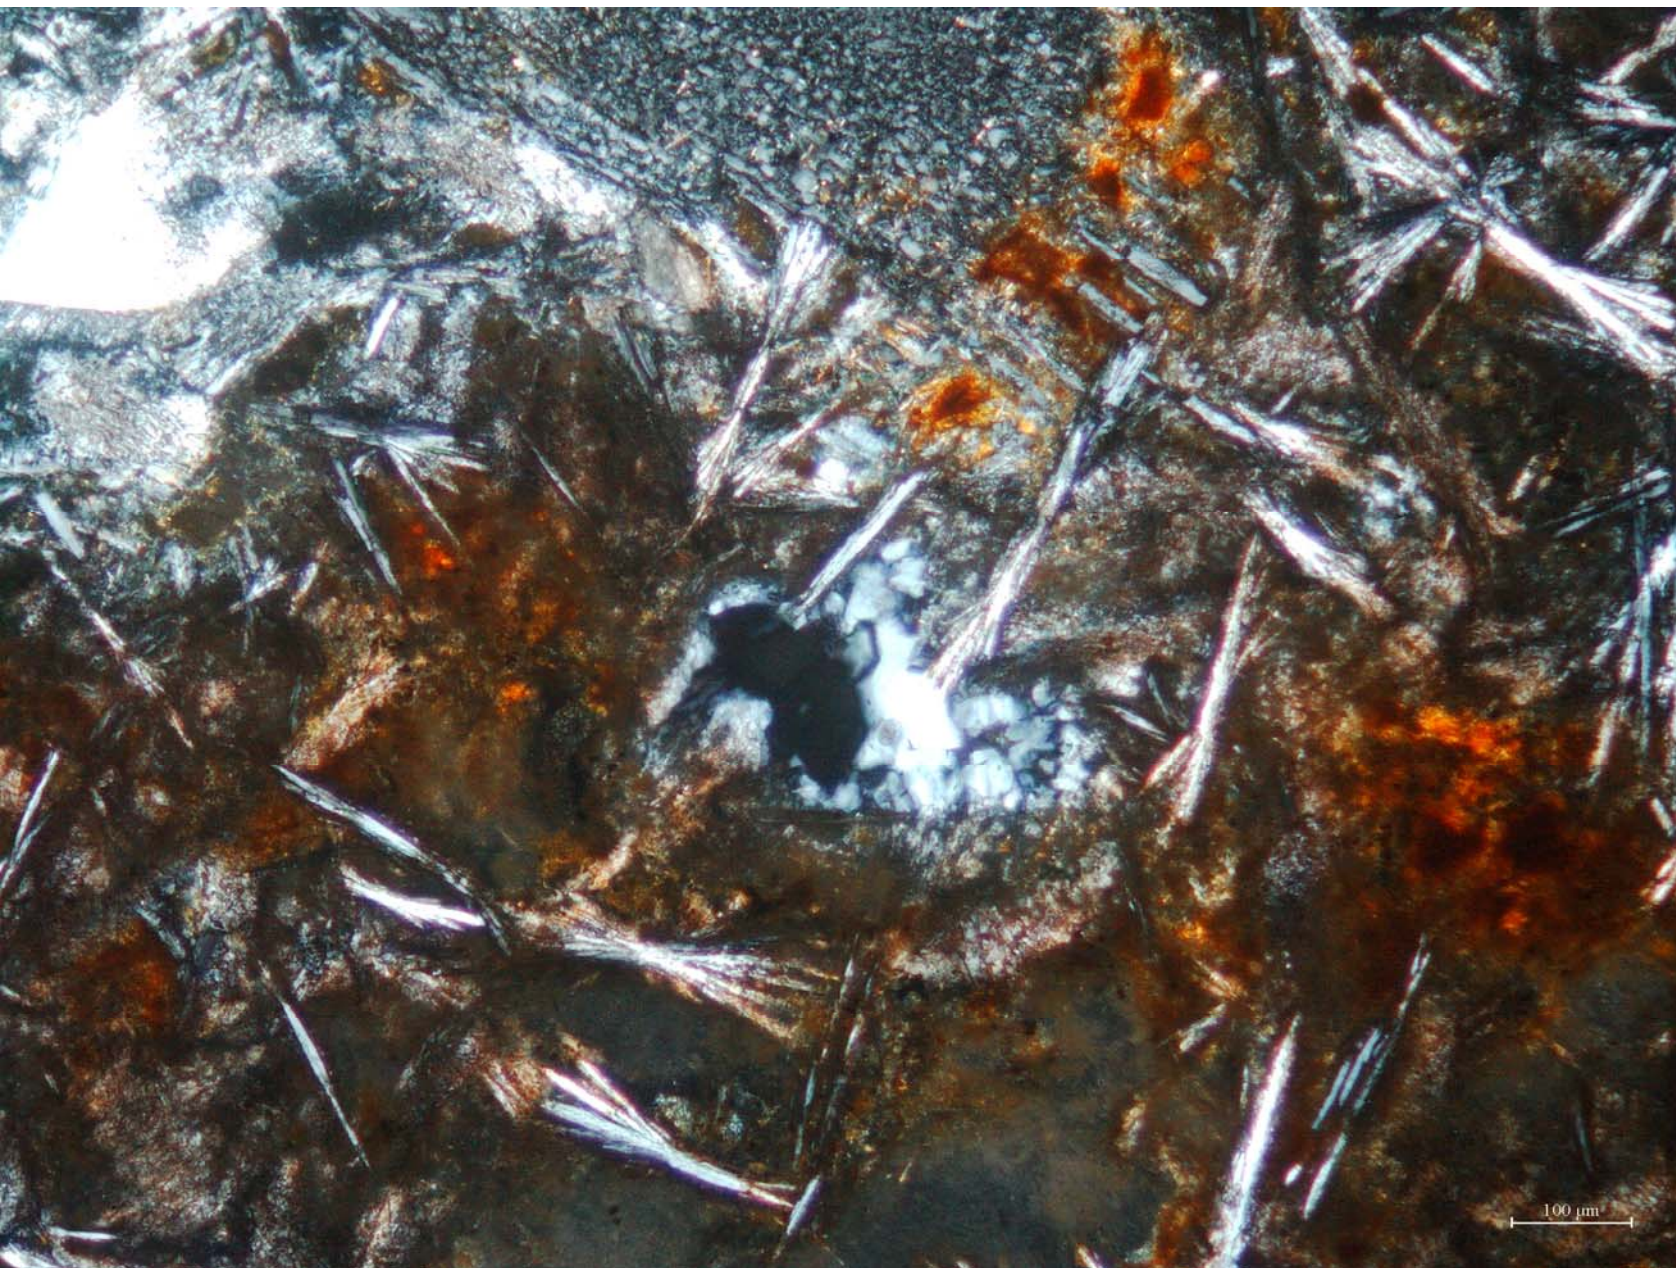

MEGT0301 - c5\_1

cross polarized light



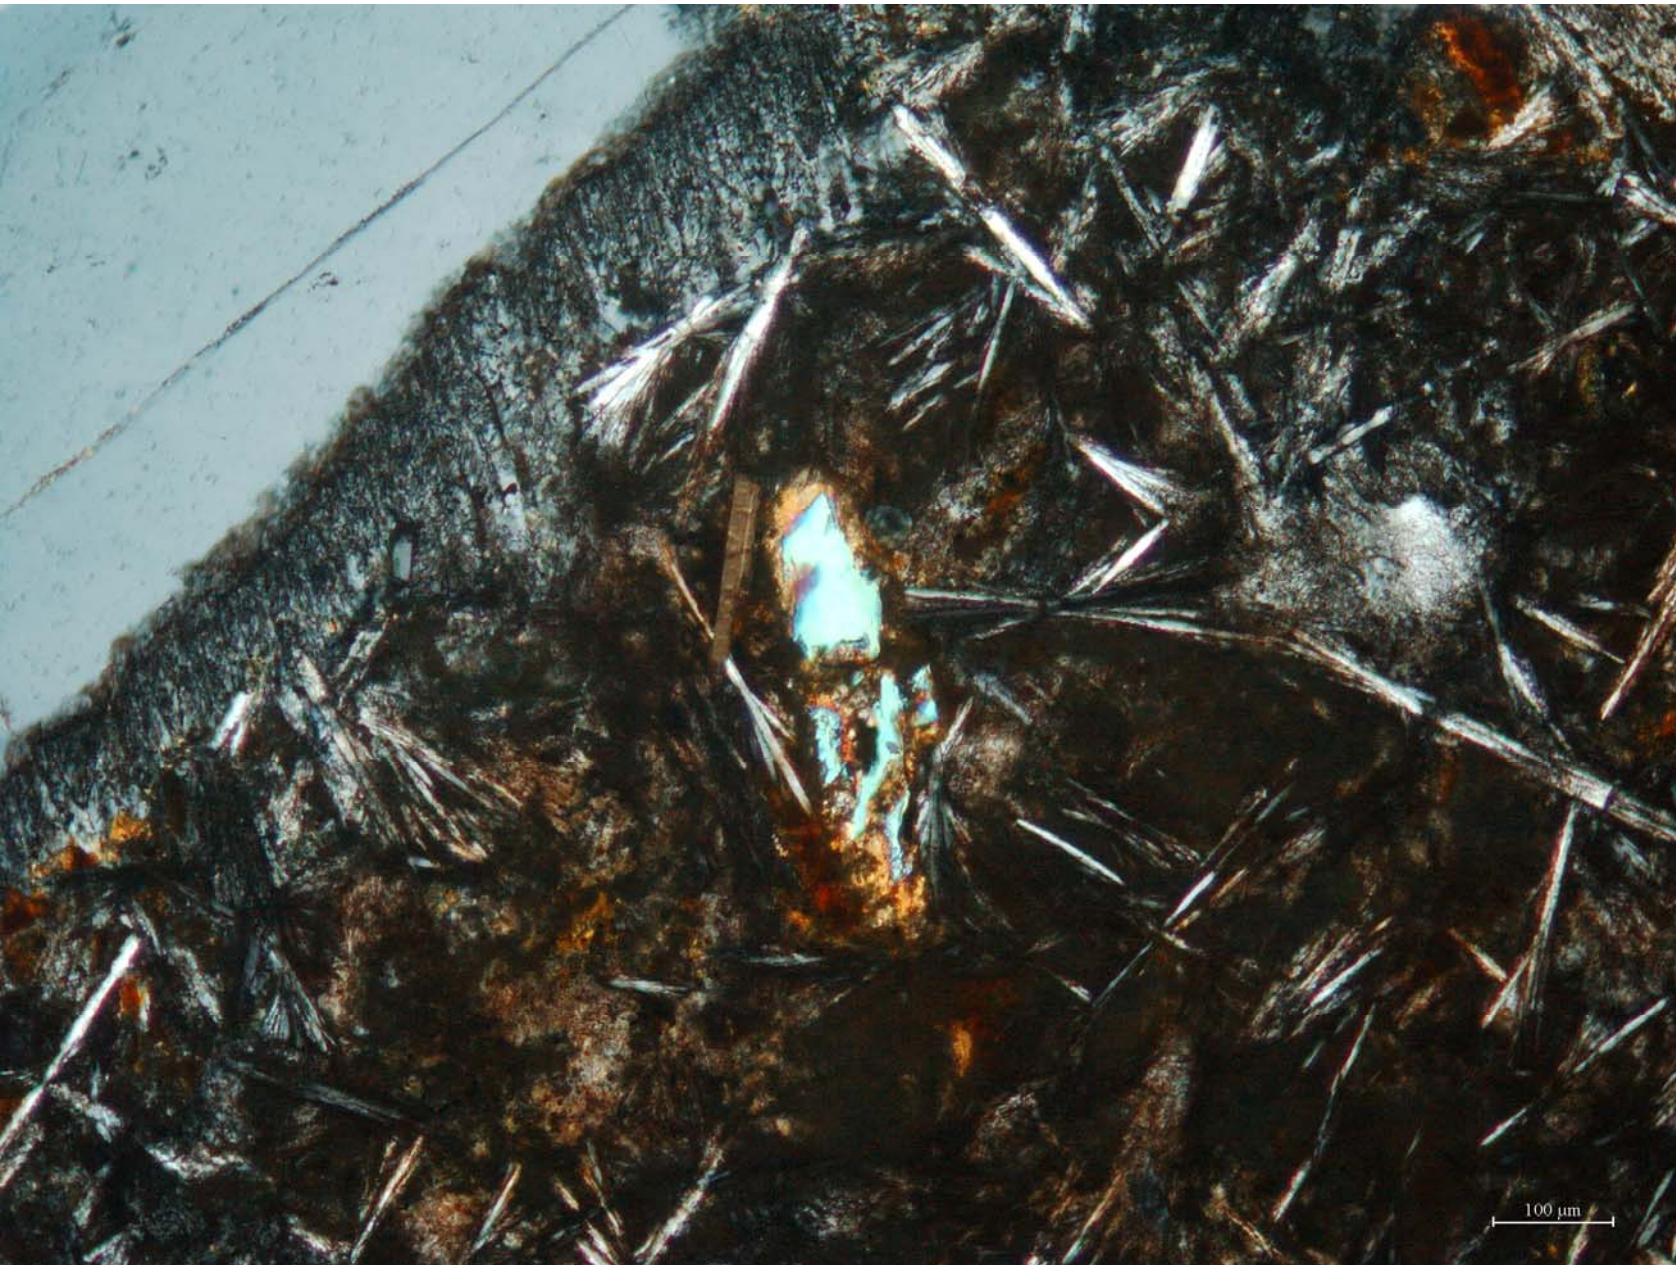

MEGT0301 - c6\_1

cross polarized light



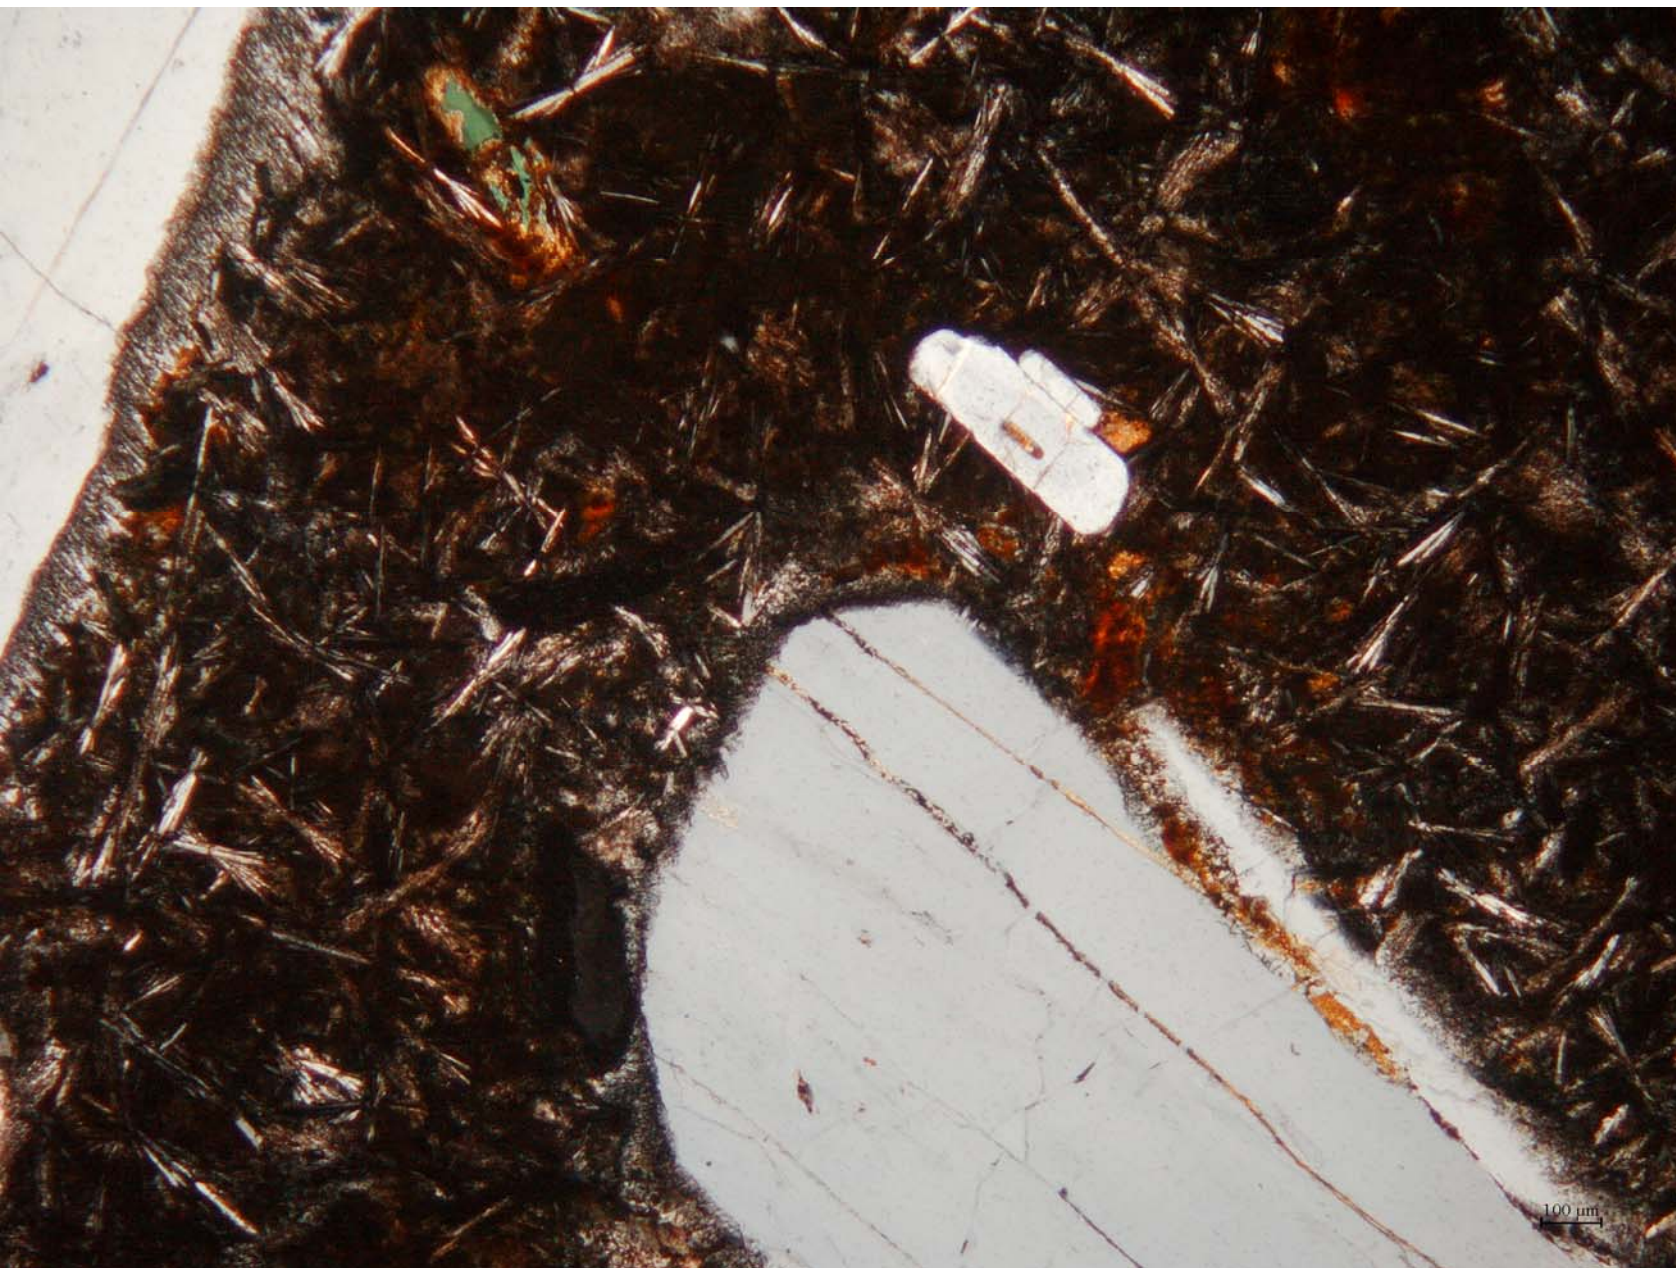

MEGT0301 – c6\_2

cross polarized light



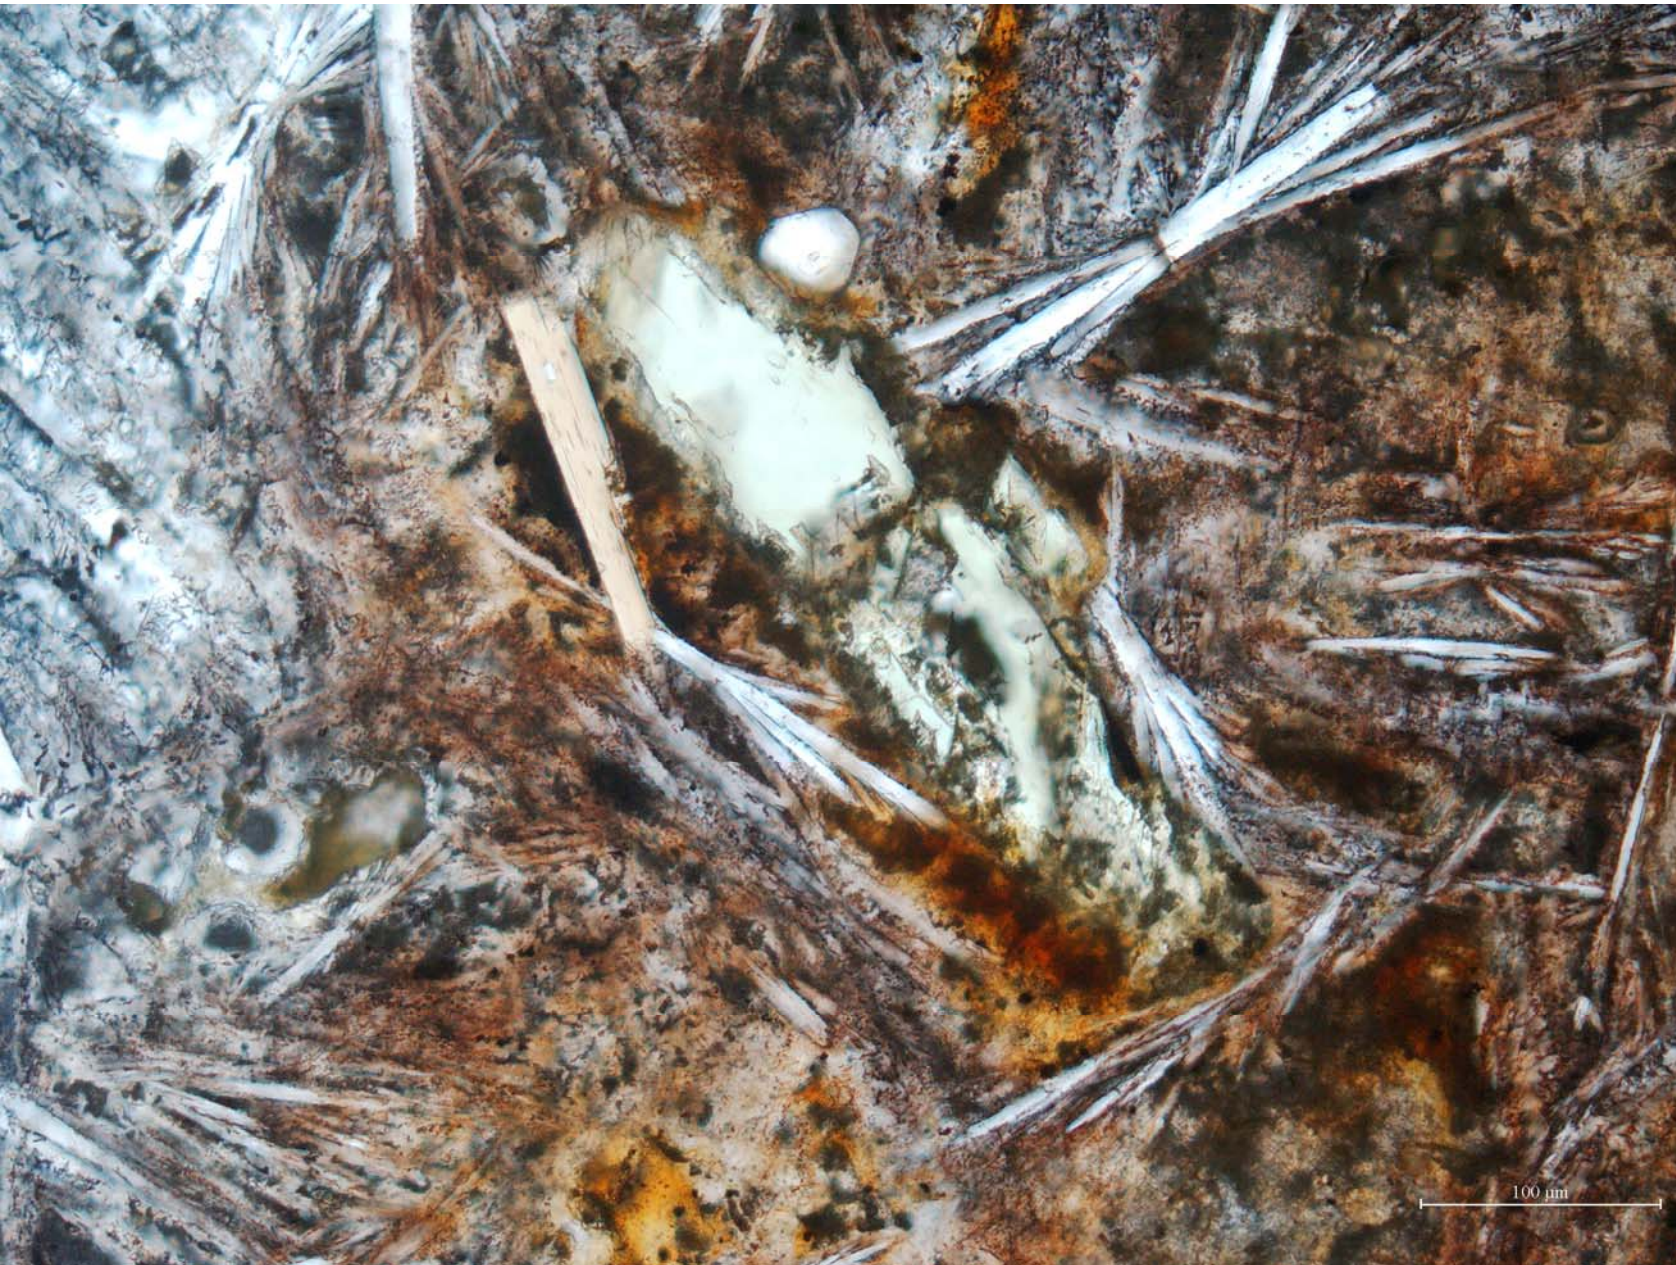

MEGT0301 – c6\_3

cross polarized light



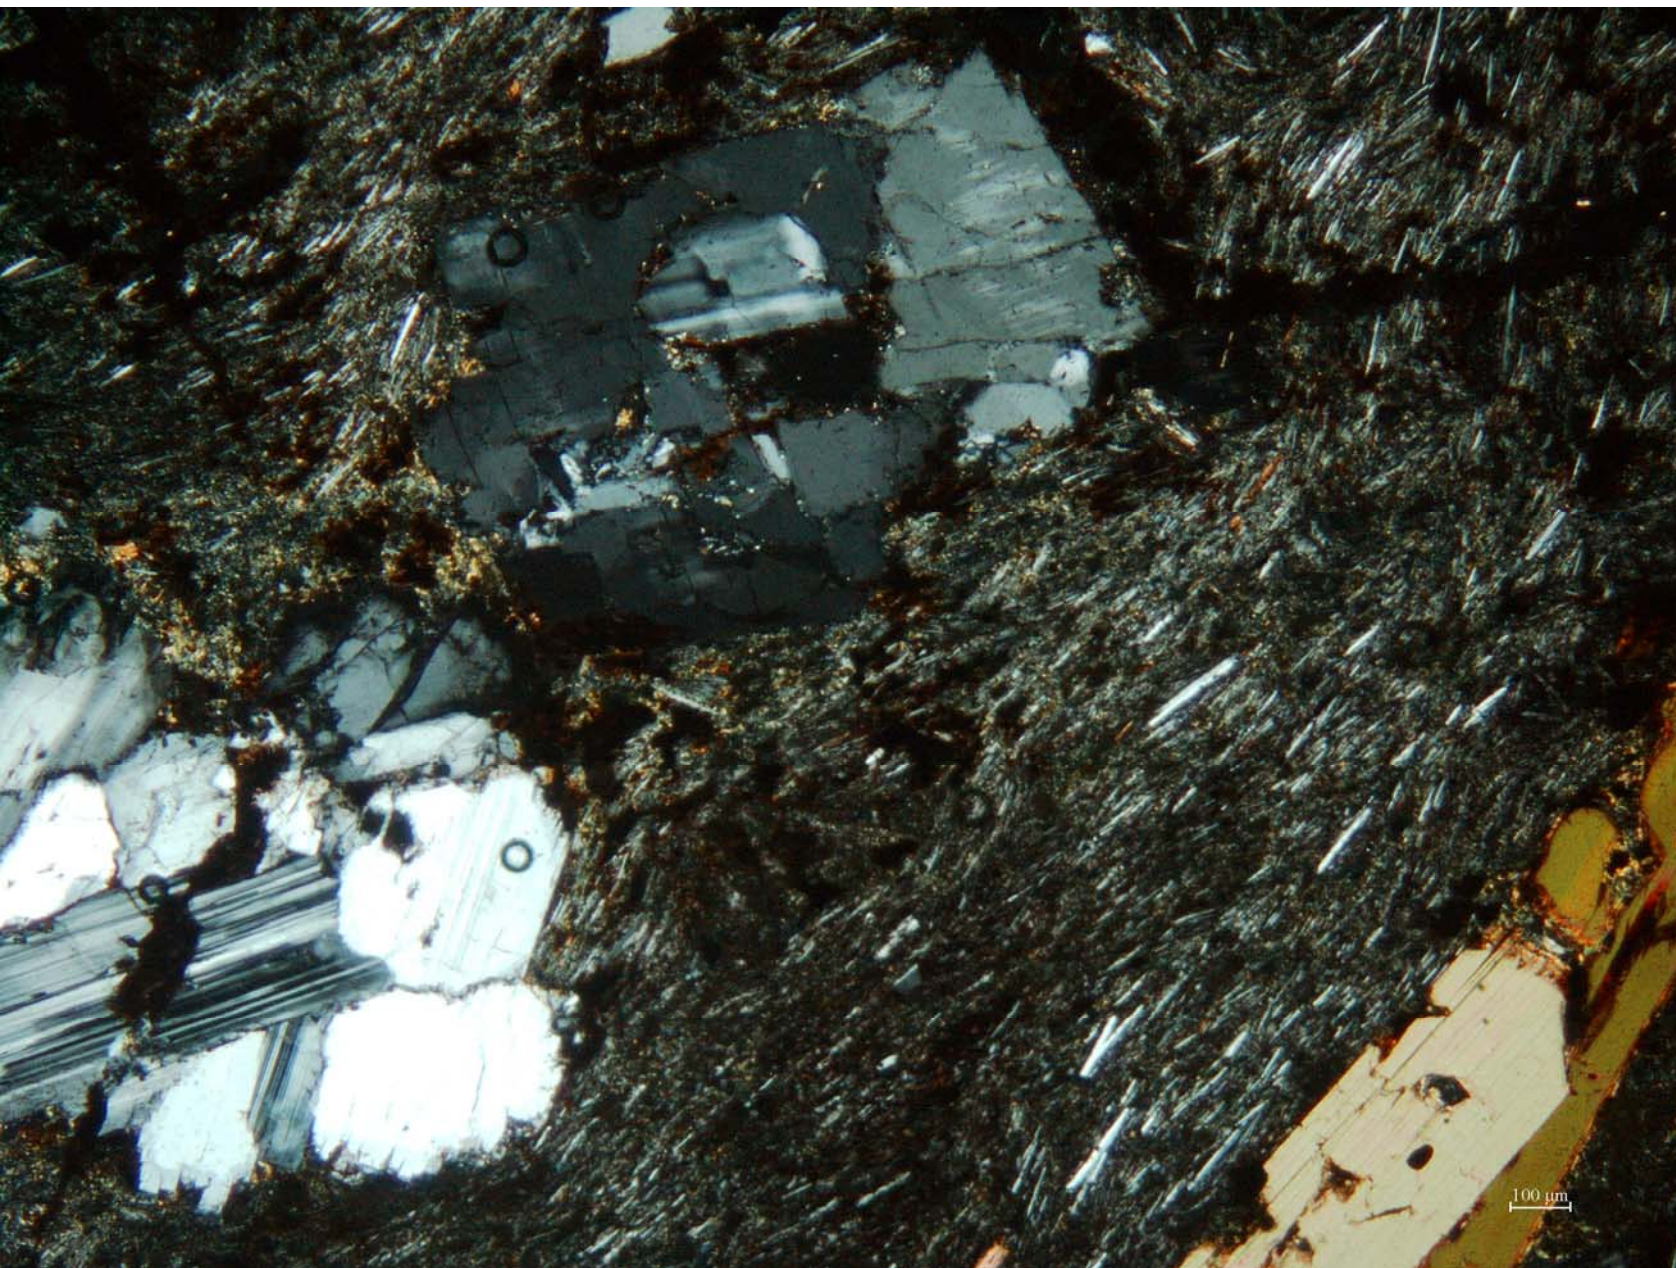

MEGT0302 – c1\_1

cross polarized light



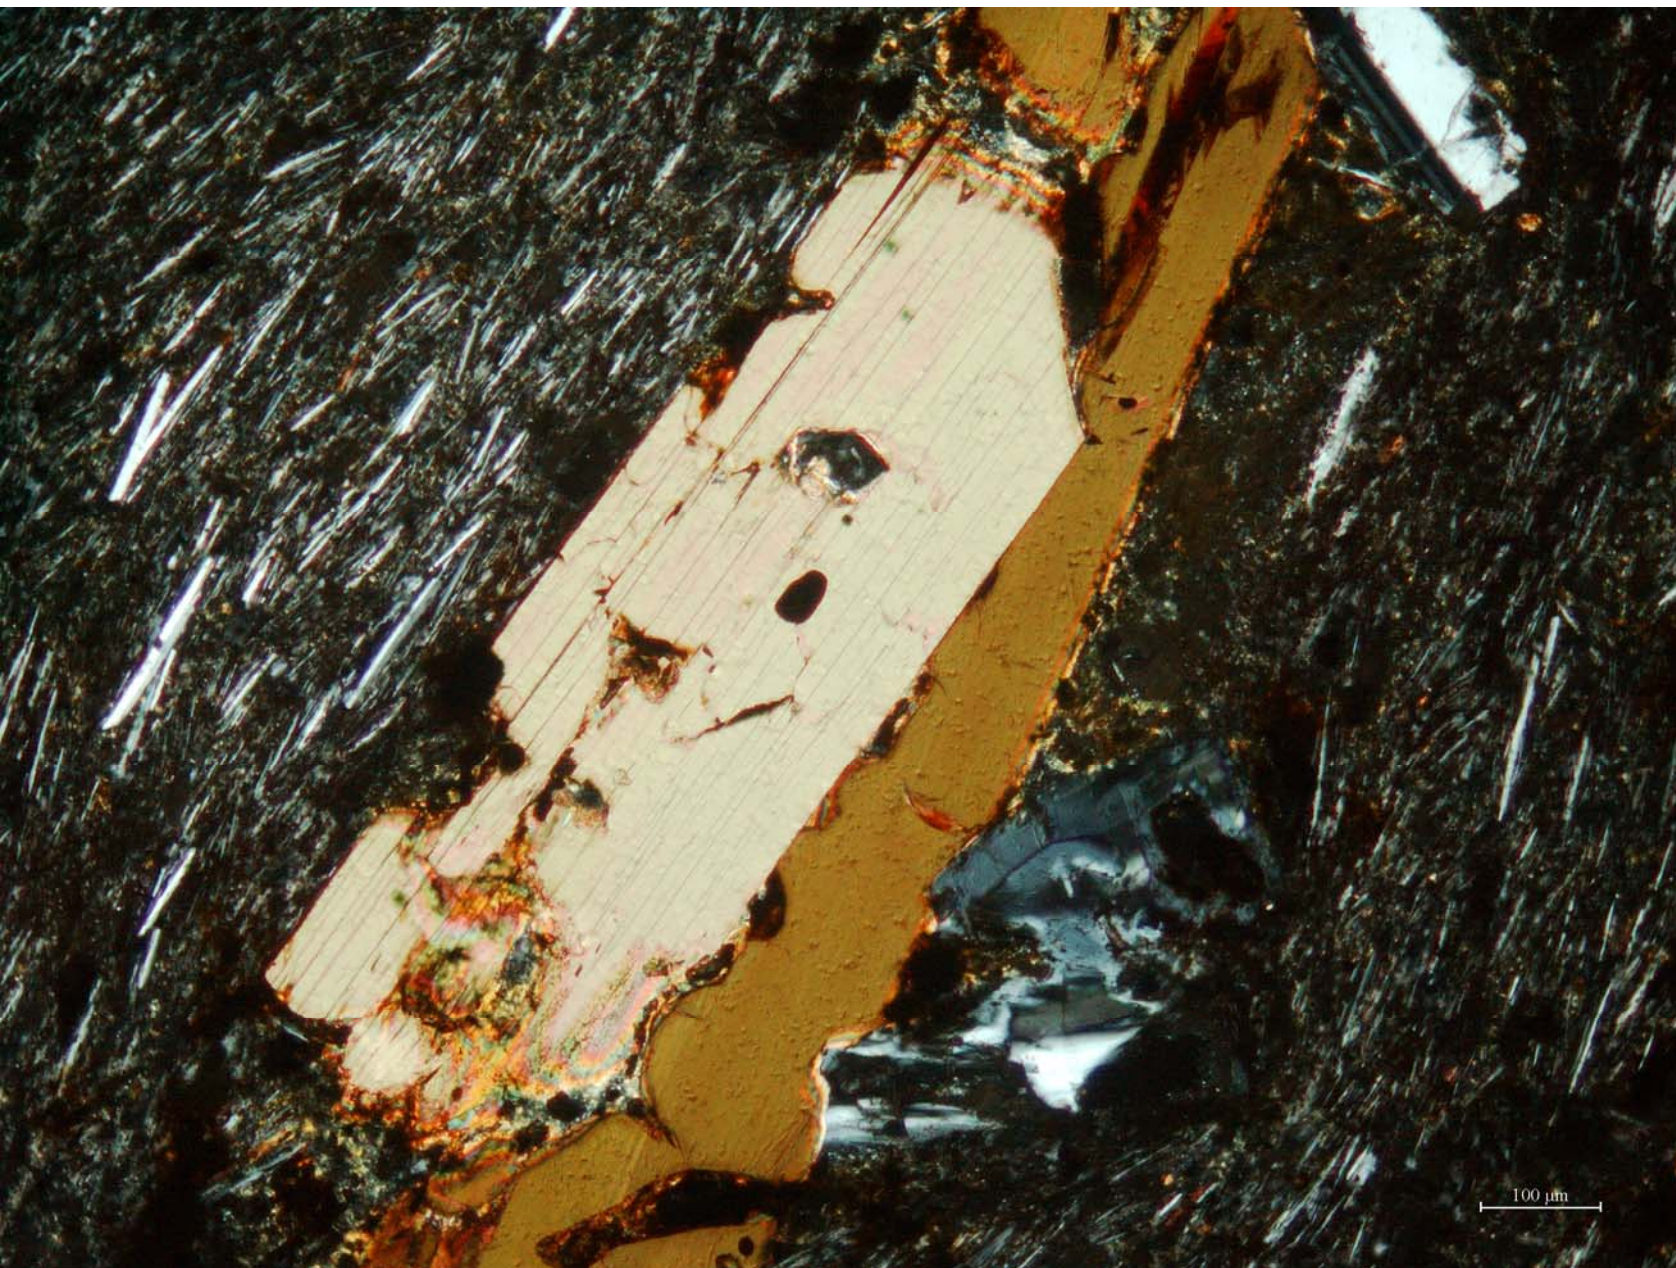

MEGT0302 – c1\_2

cross polarized light



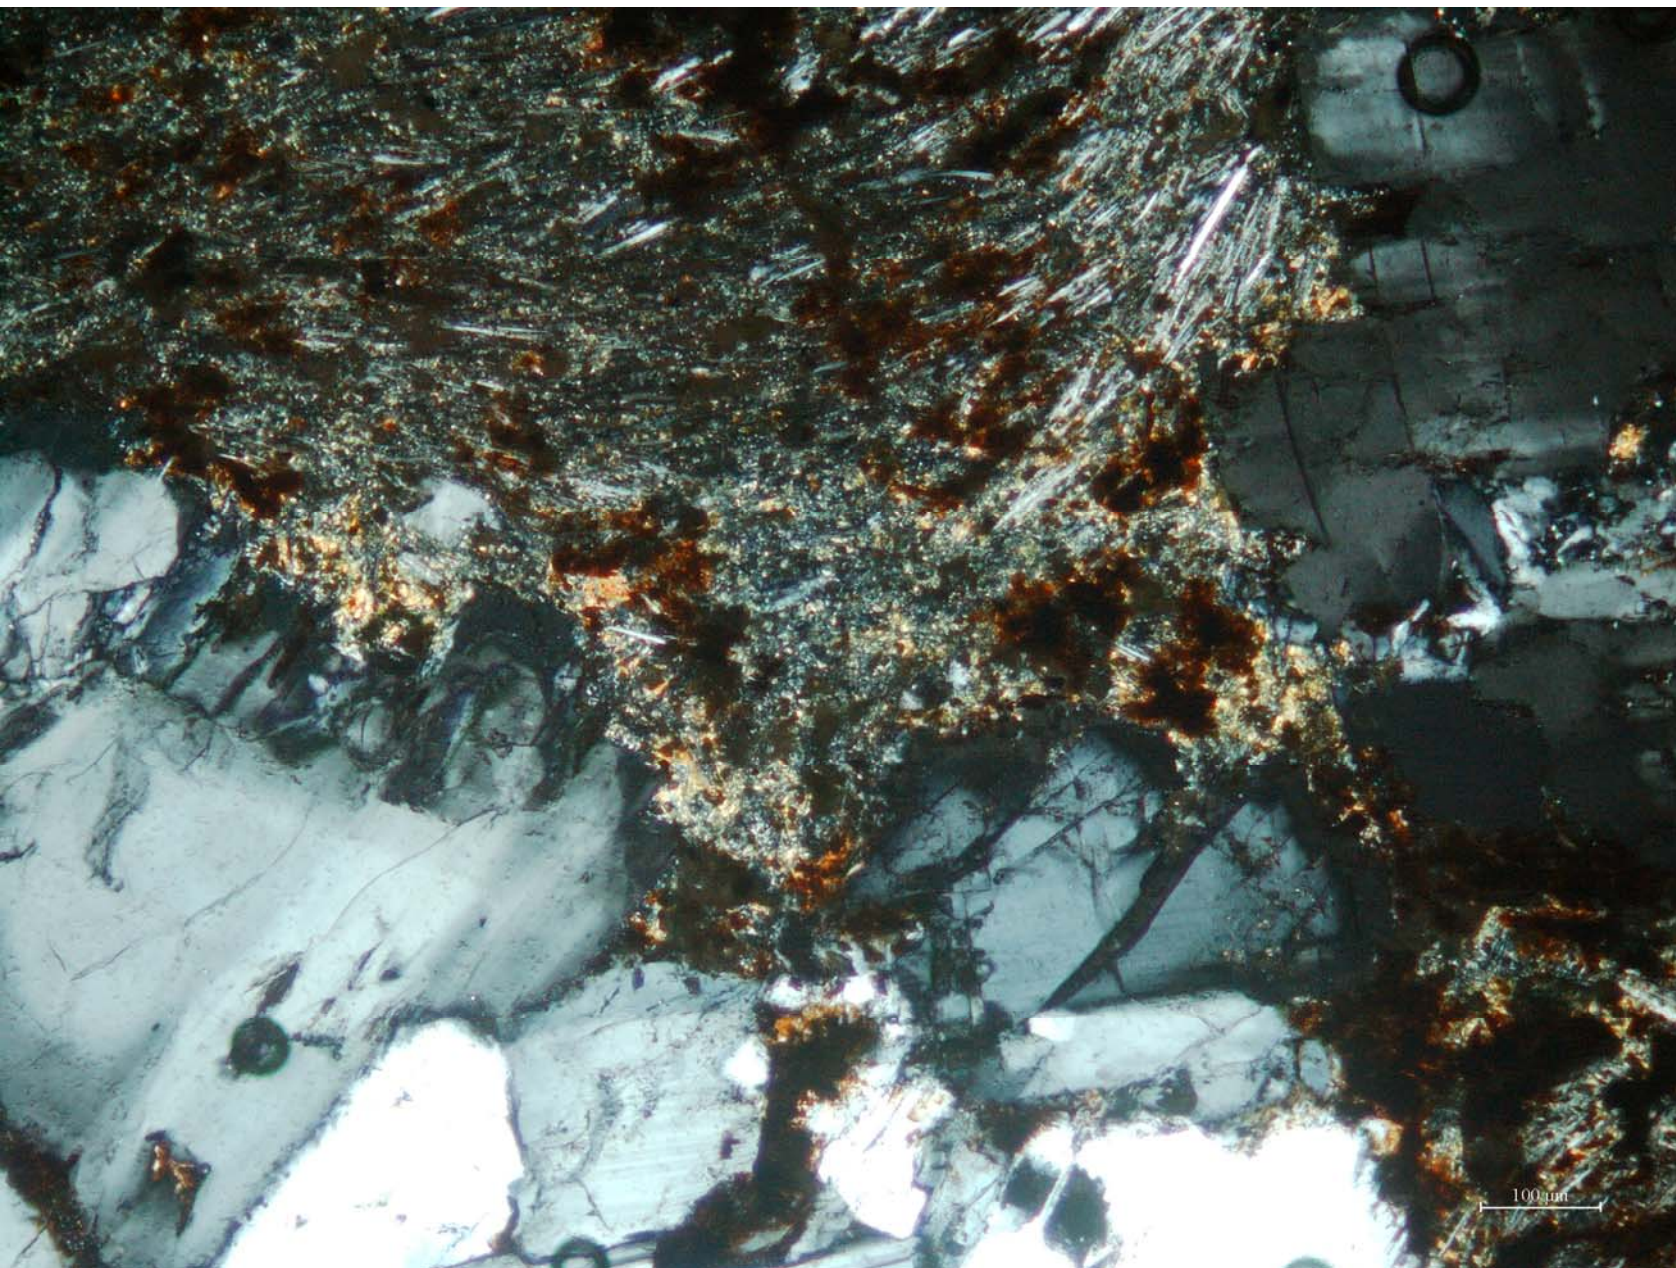

MEGT0302 – c1\_3

cross polarized light



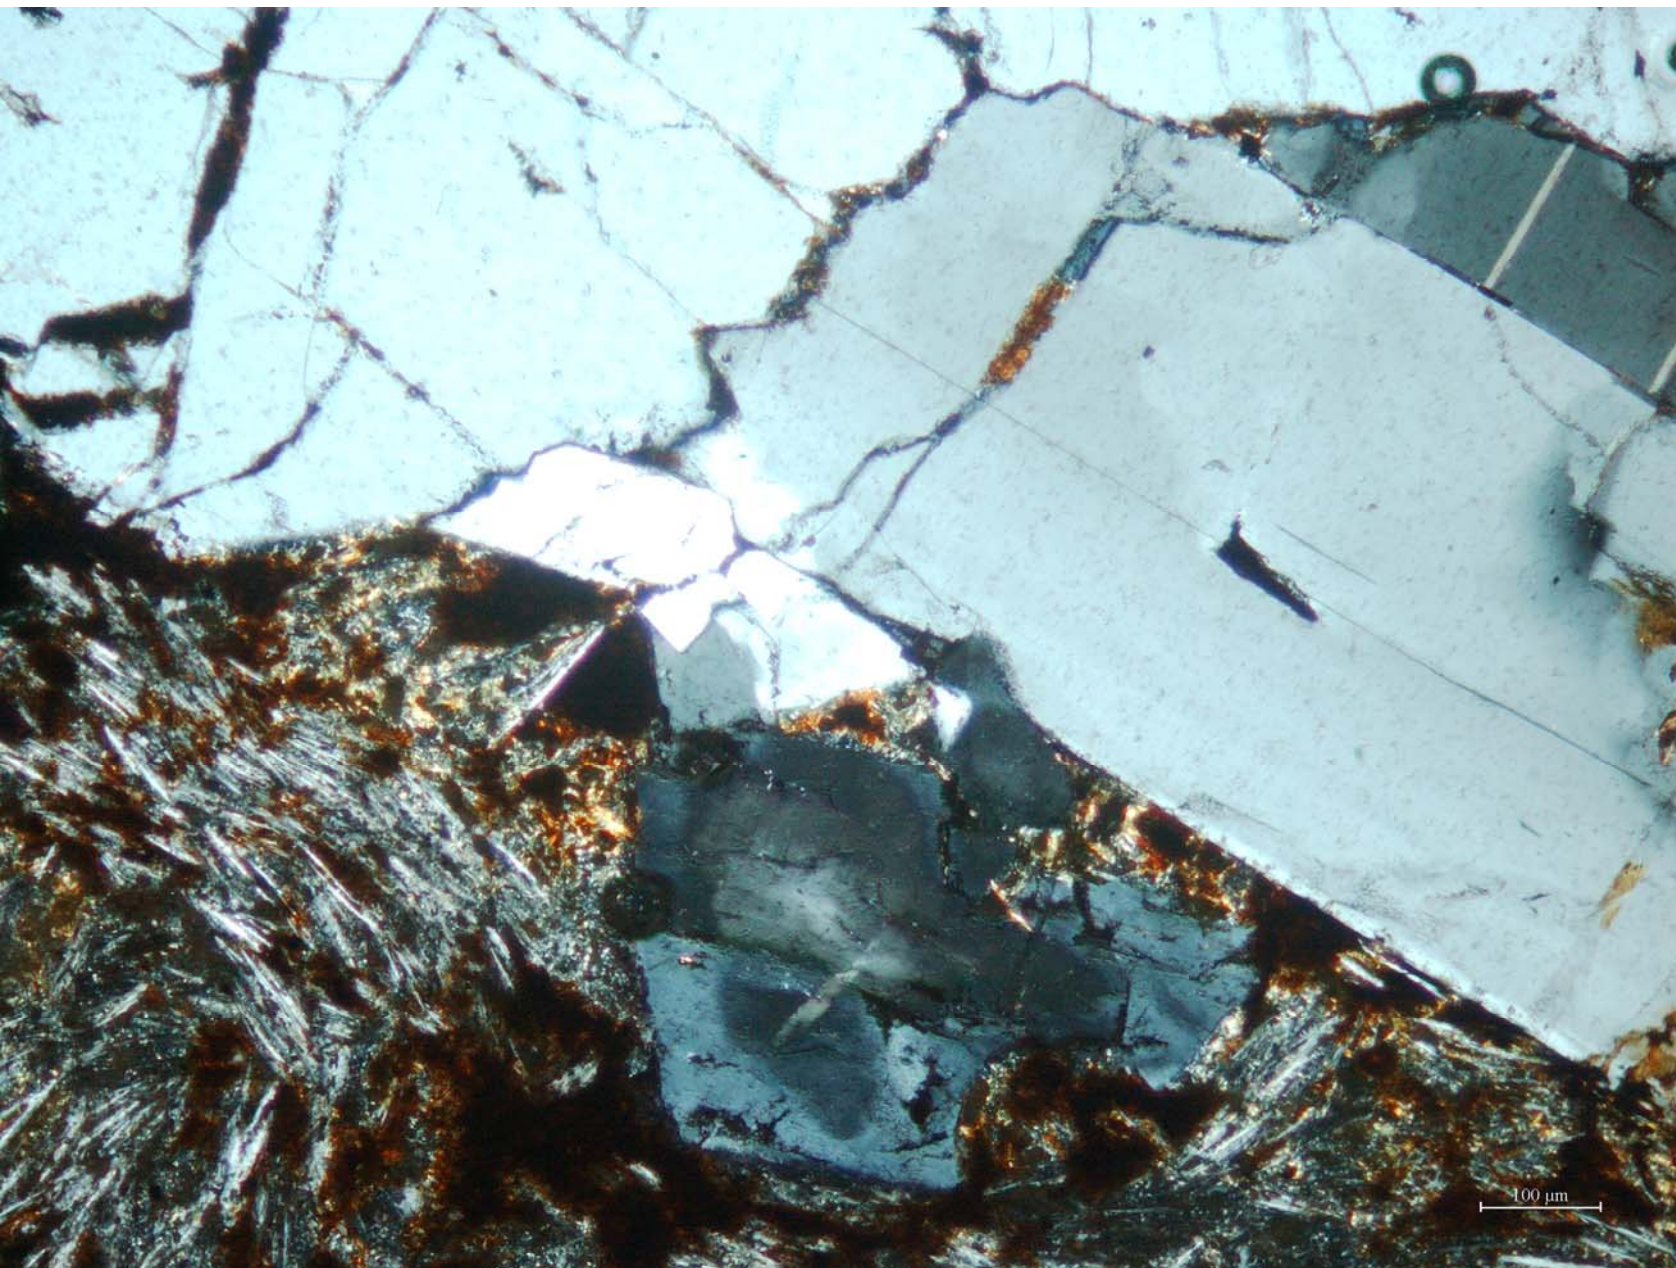

MEGT0302 – c2\_1

cross polarized light



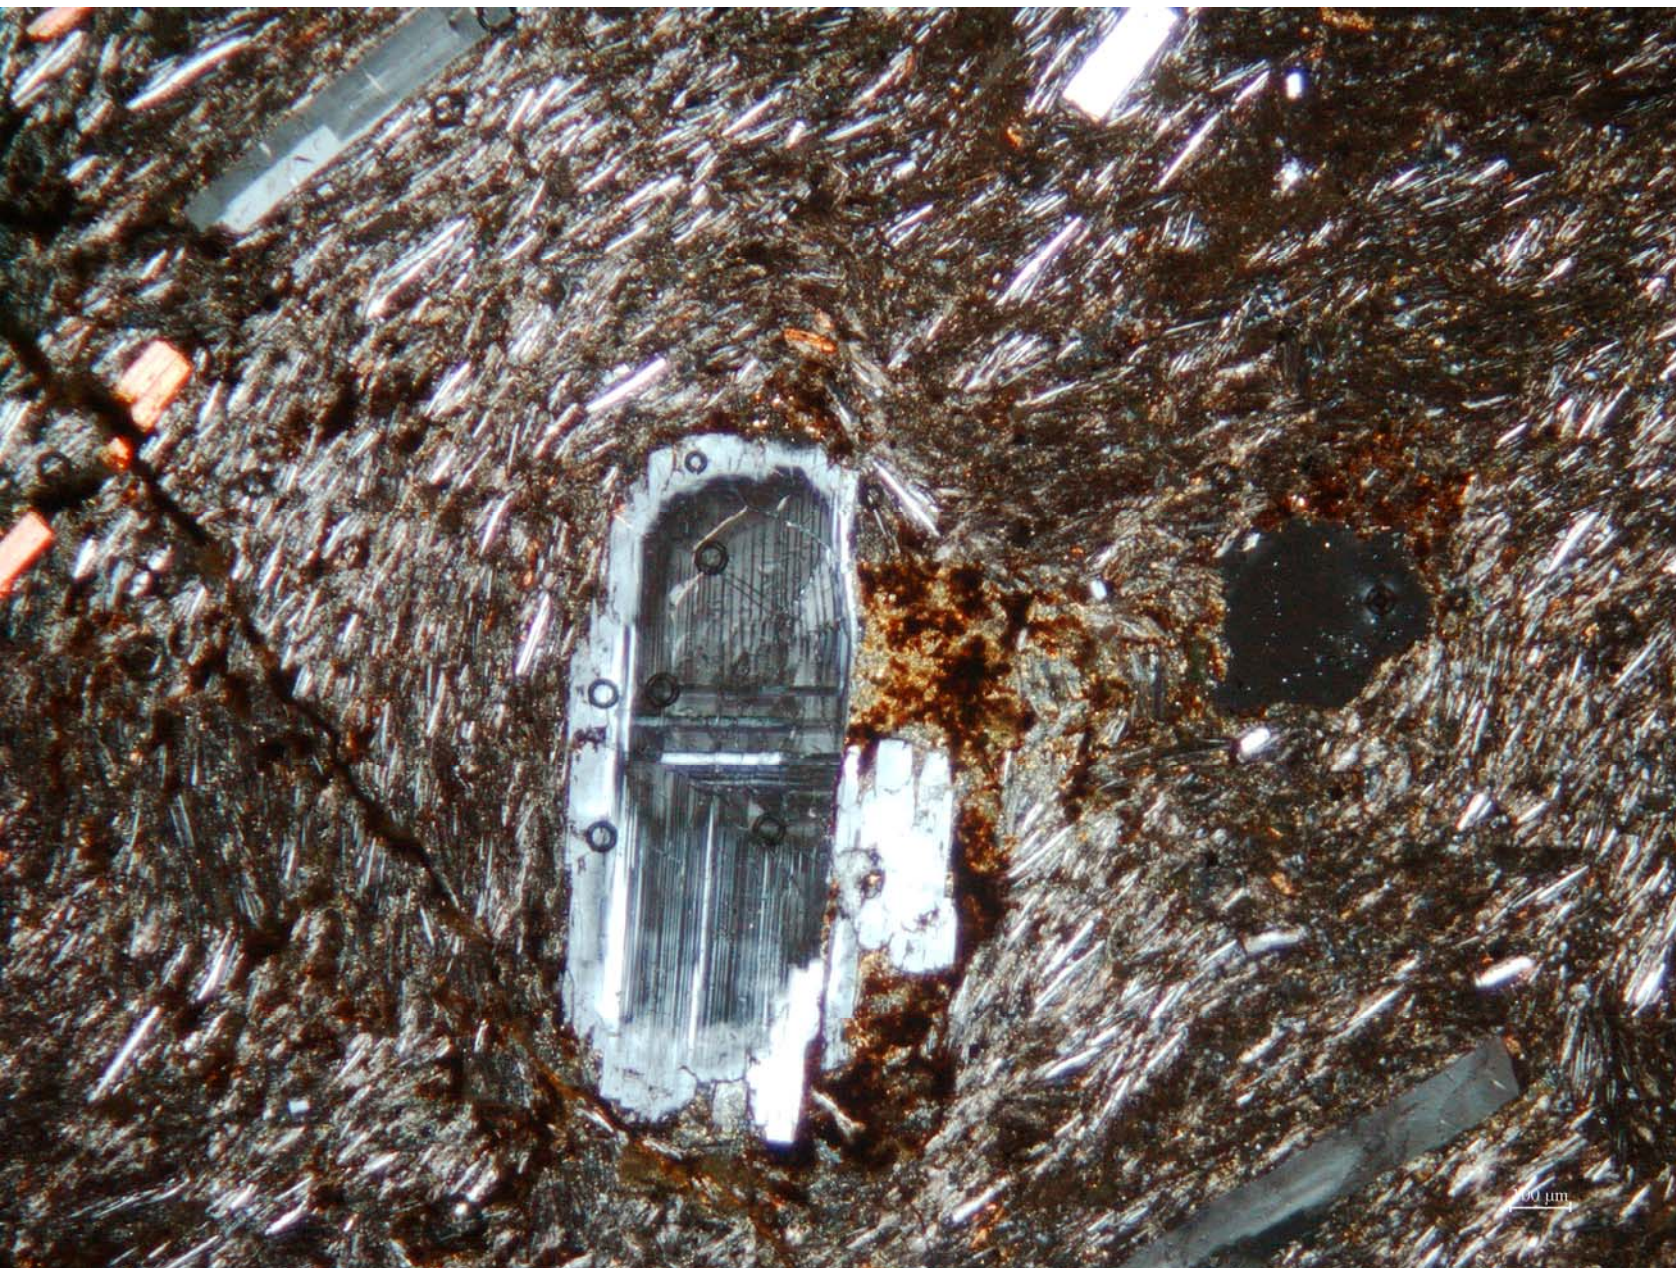

MEGT0302 – c3\_1

cross polarized light



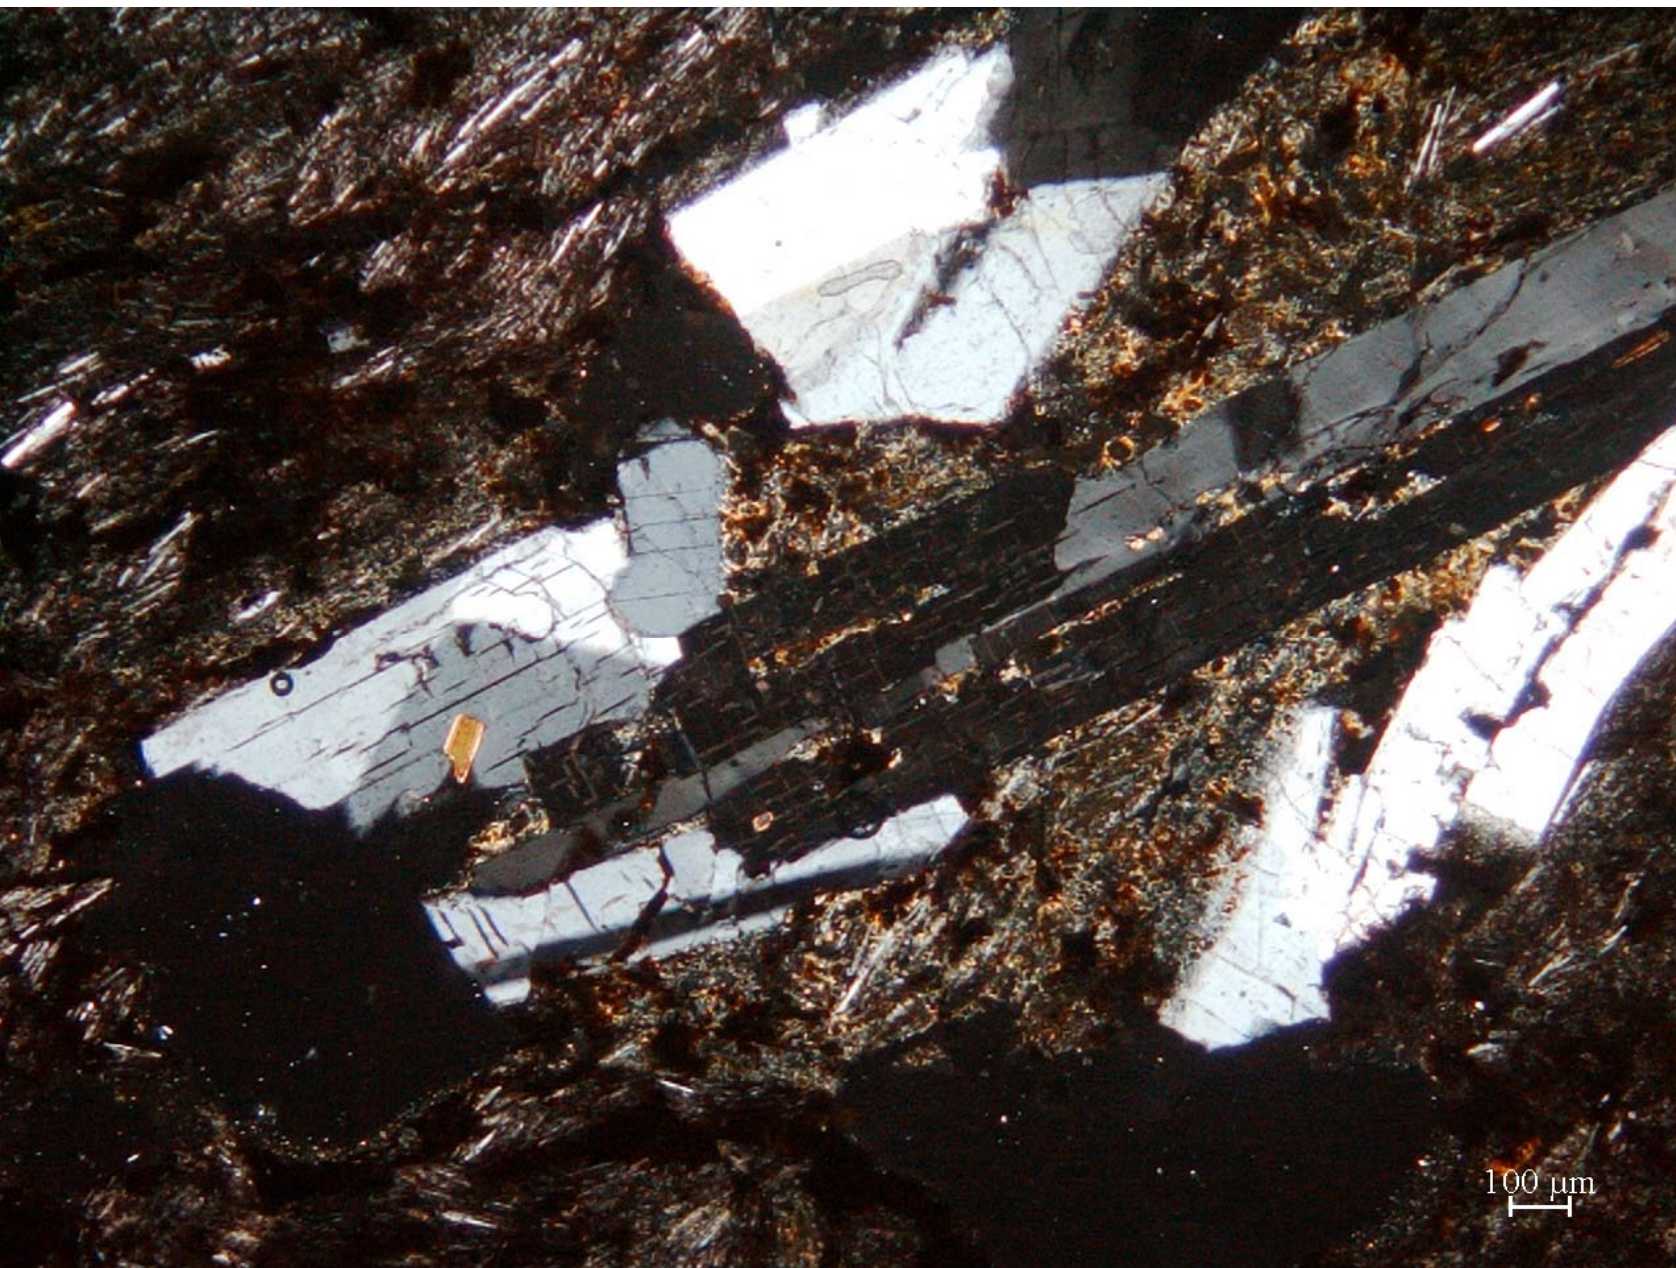

MEGT0302 – c4\_1

cross polarized light



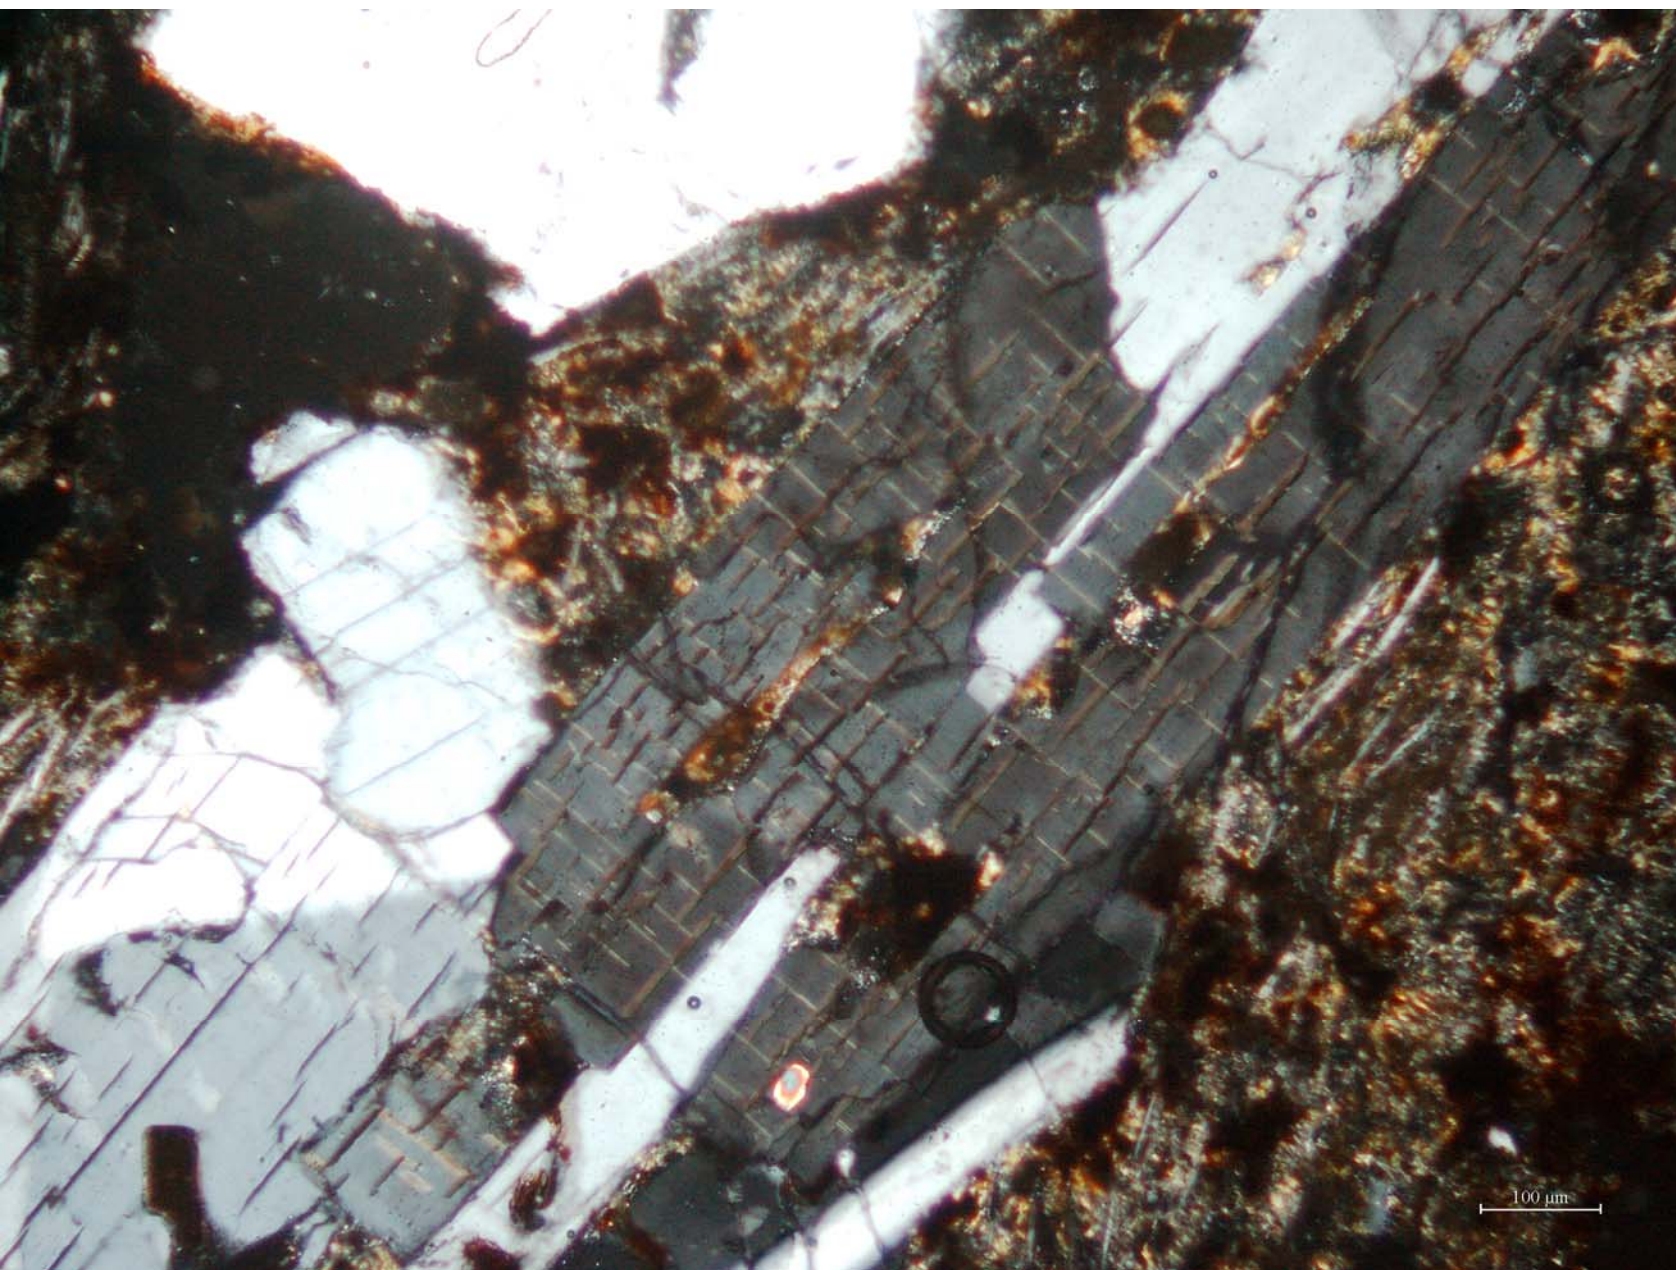

MEGT0302 – c4\_2

cross polarized light



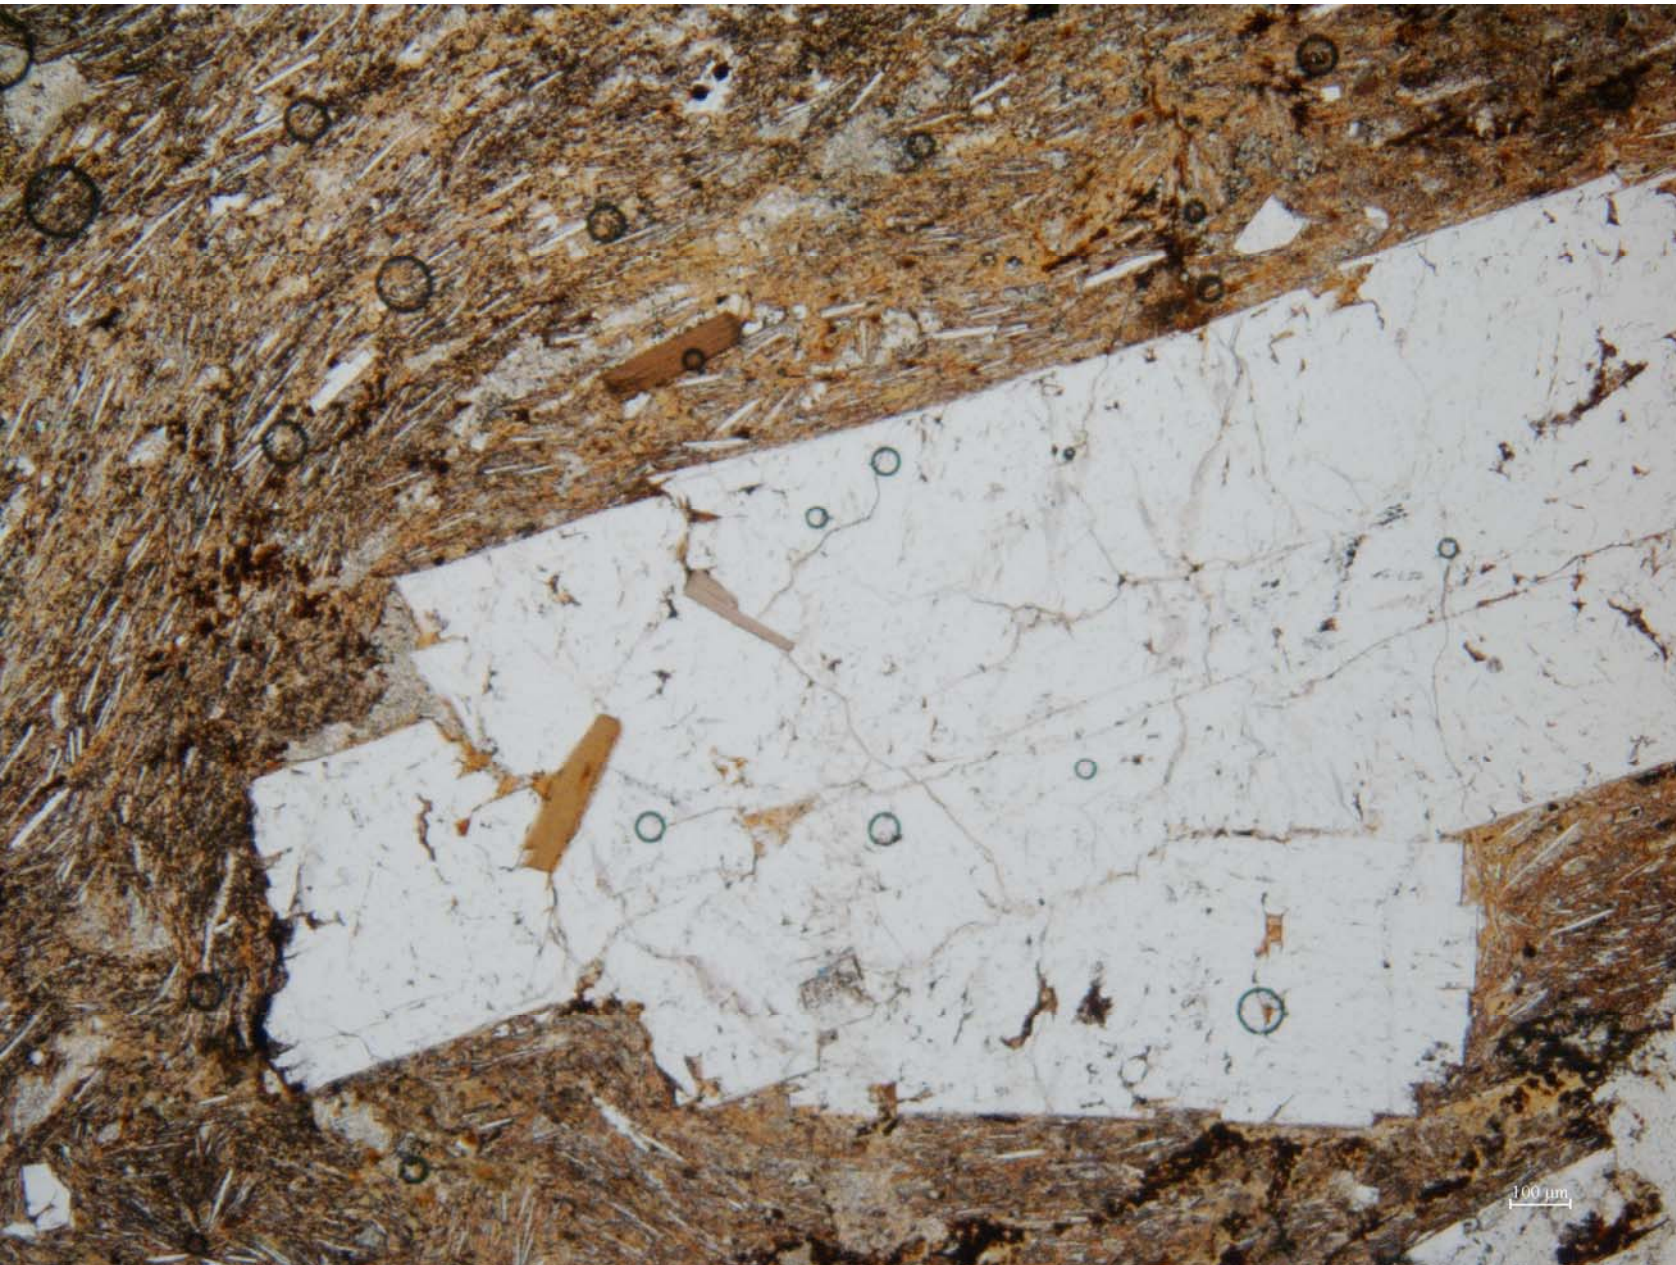

MEGT0302 – c5\_2

plane polarized light



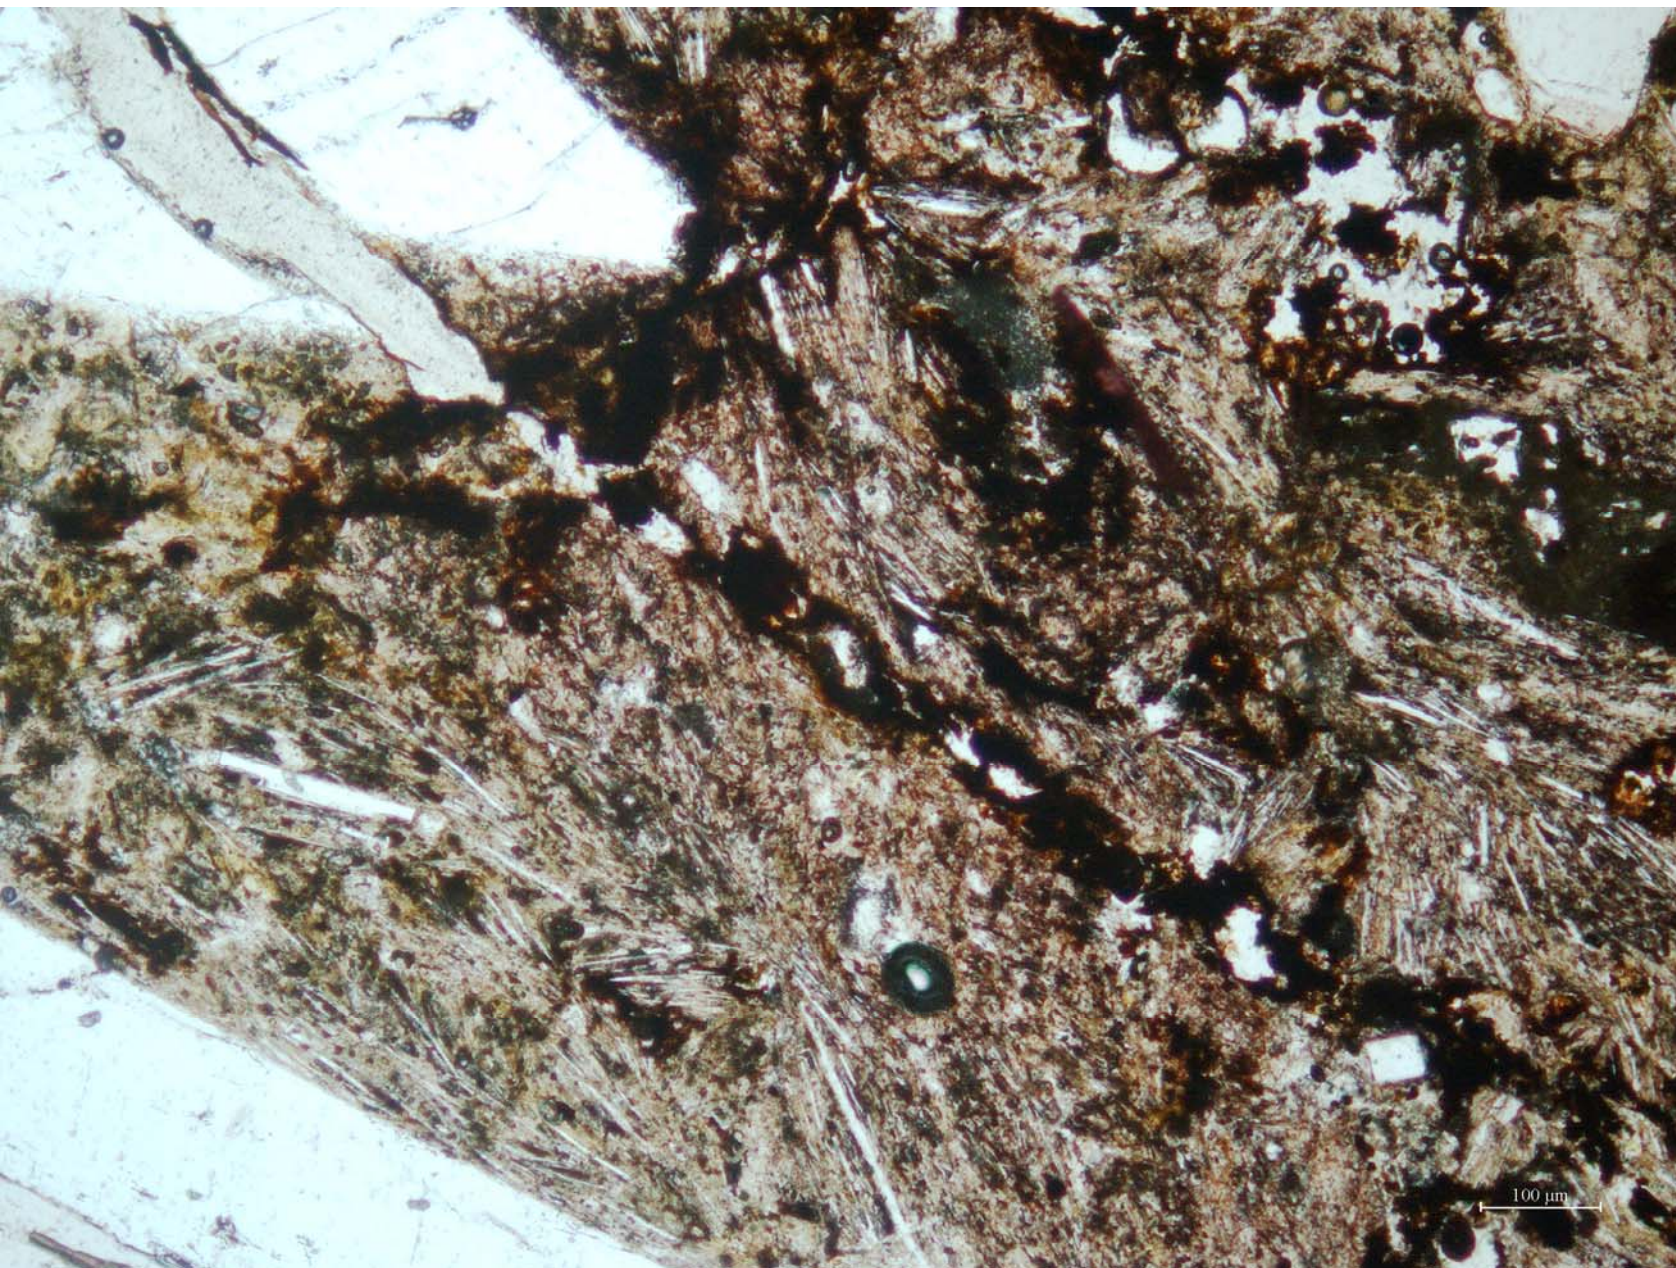

MEGT0302 - c7\_1

plane polarized light



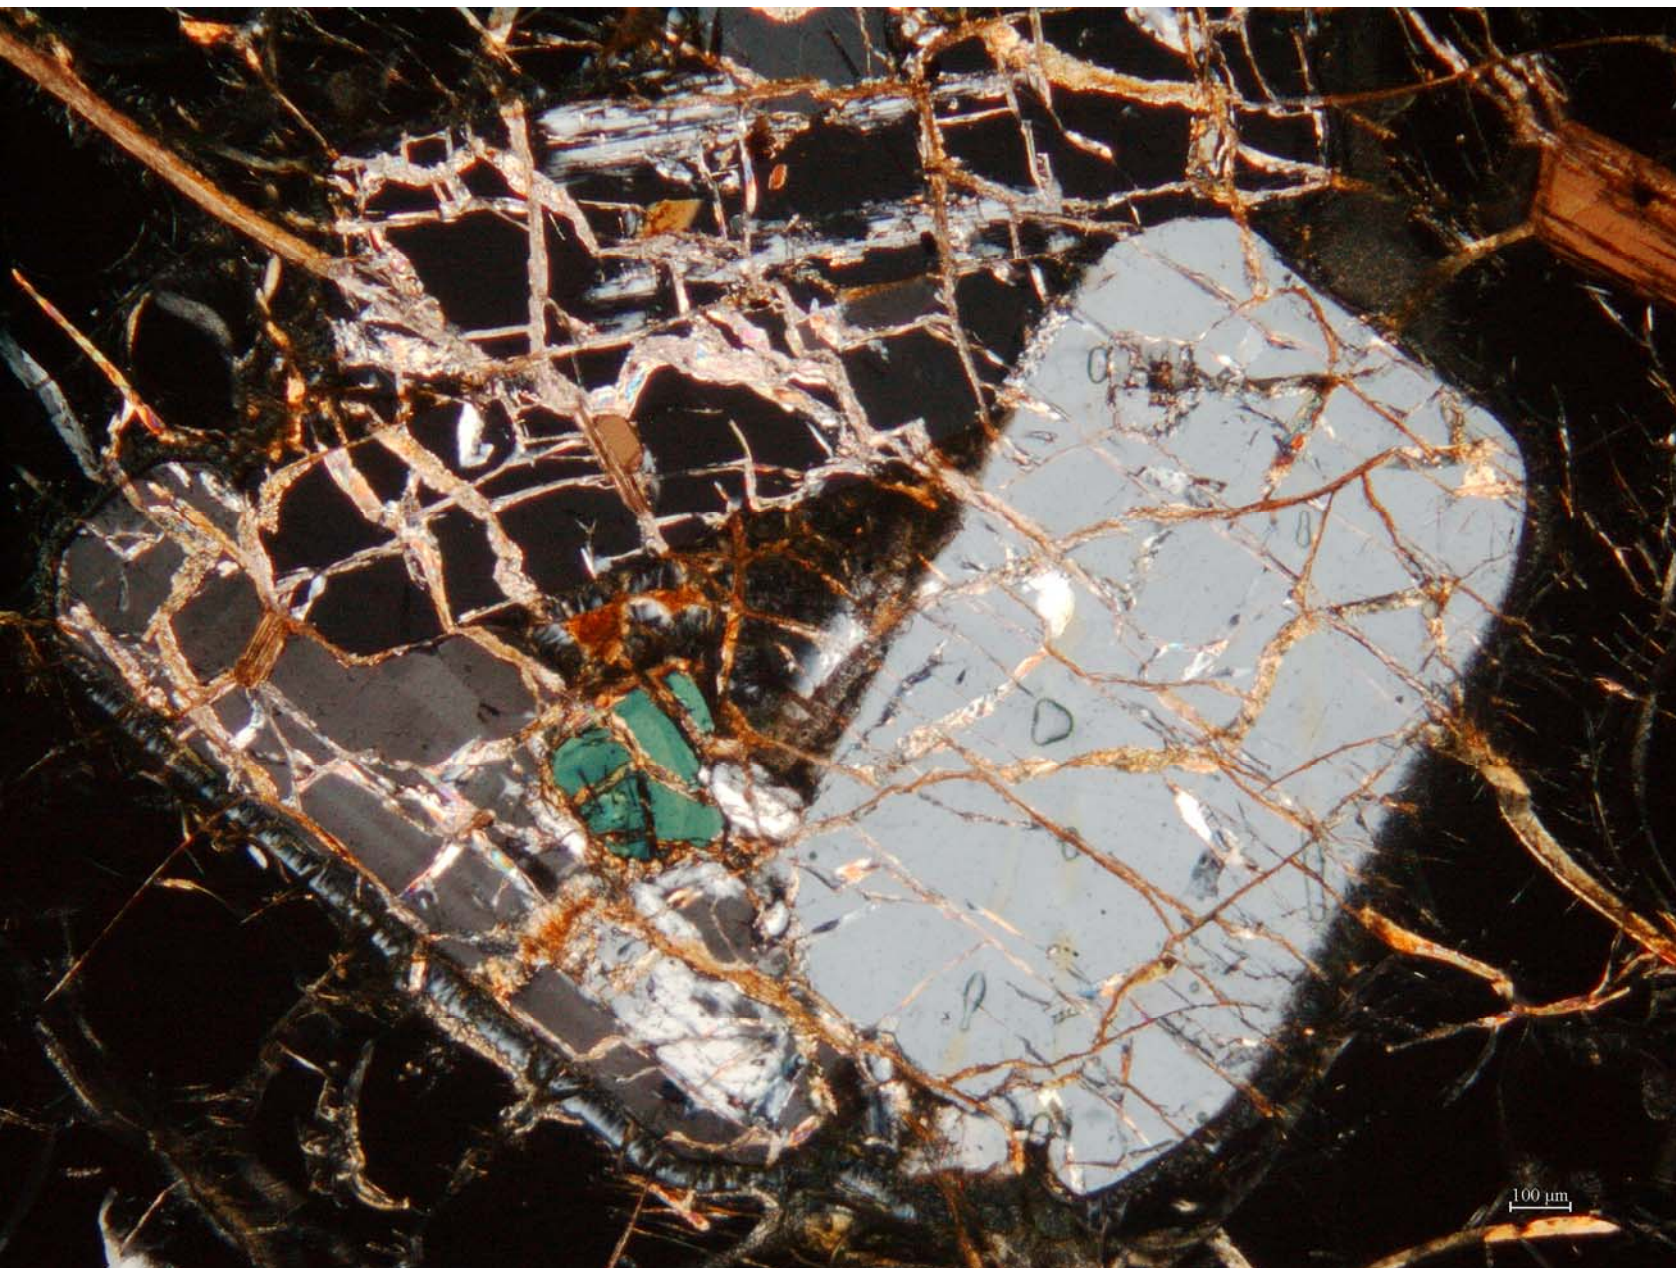

MEGT0318 – c1\_1

cross polarized light



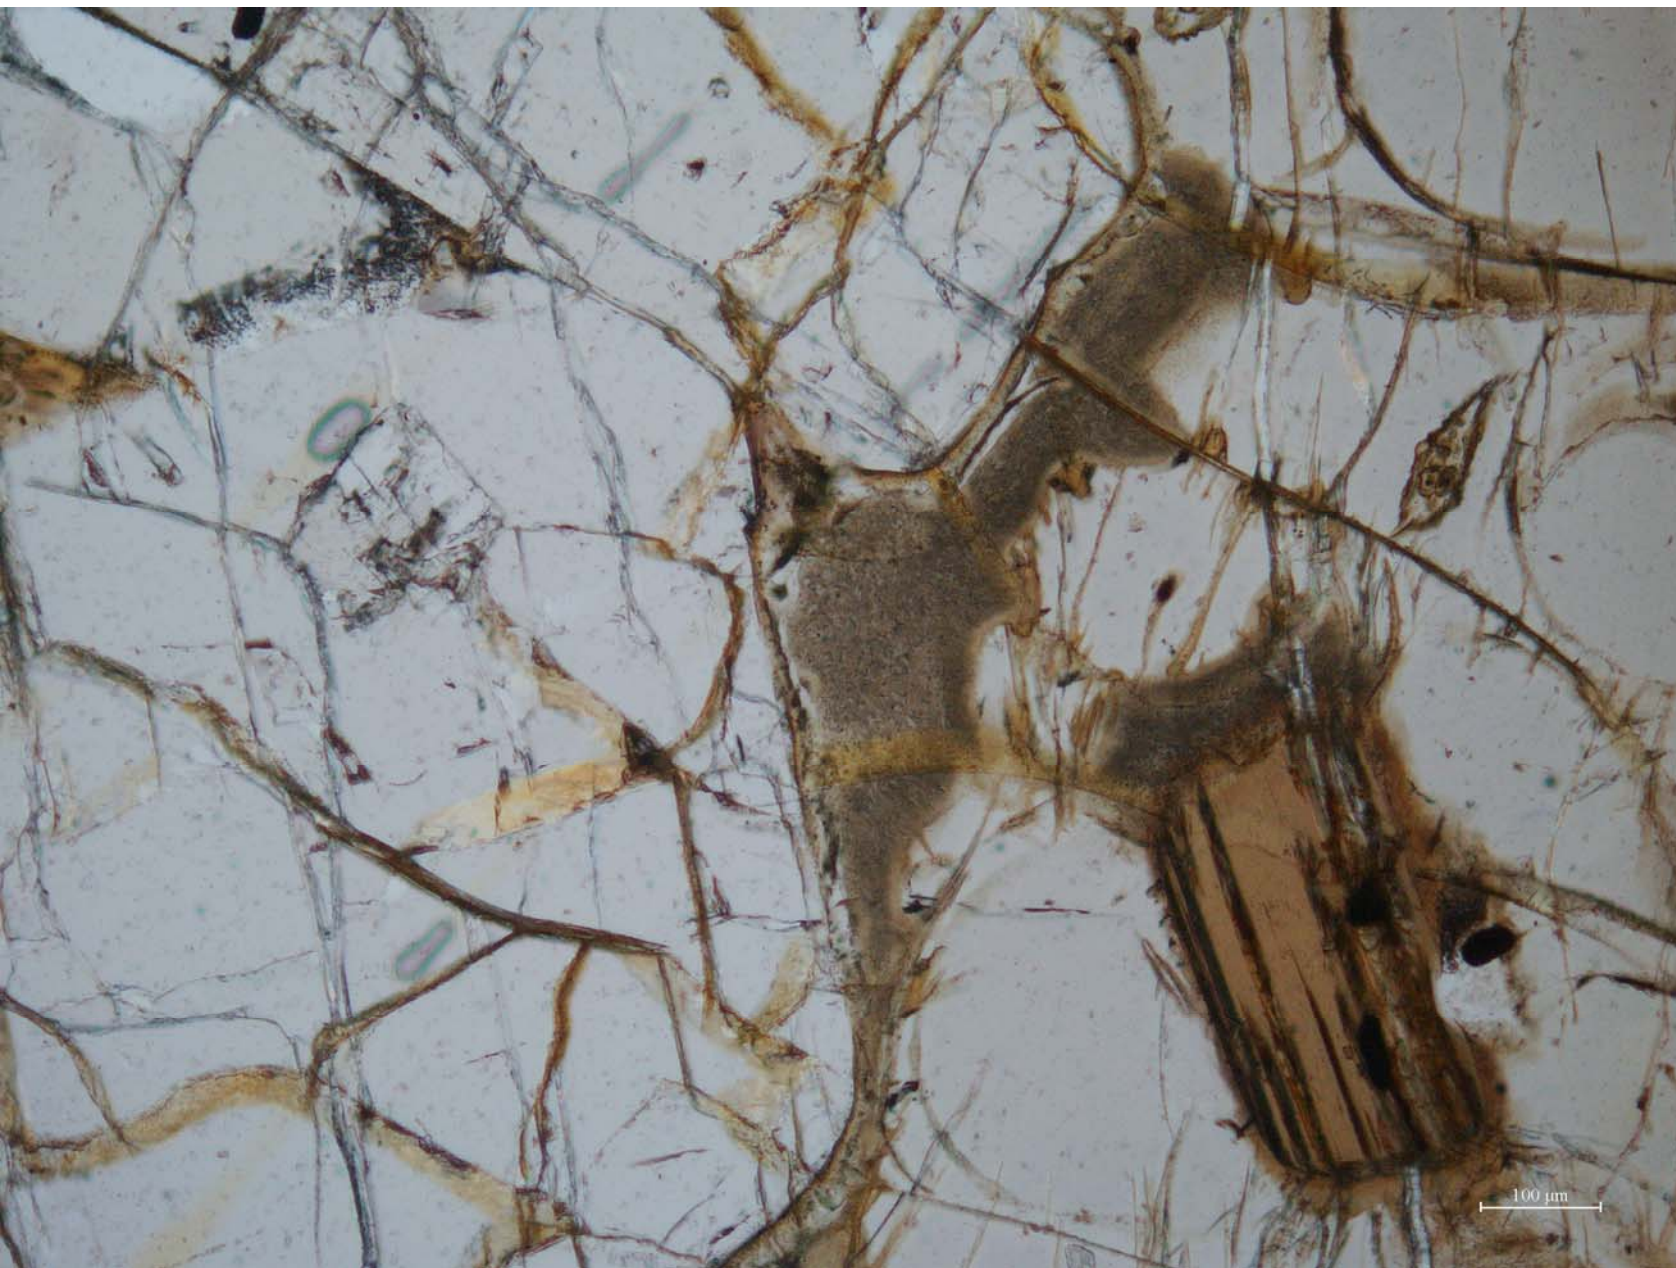

MEGT0318 - c1\_2

plane polarized light



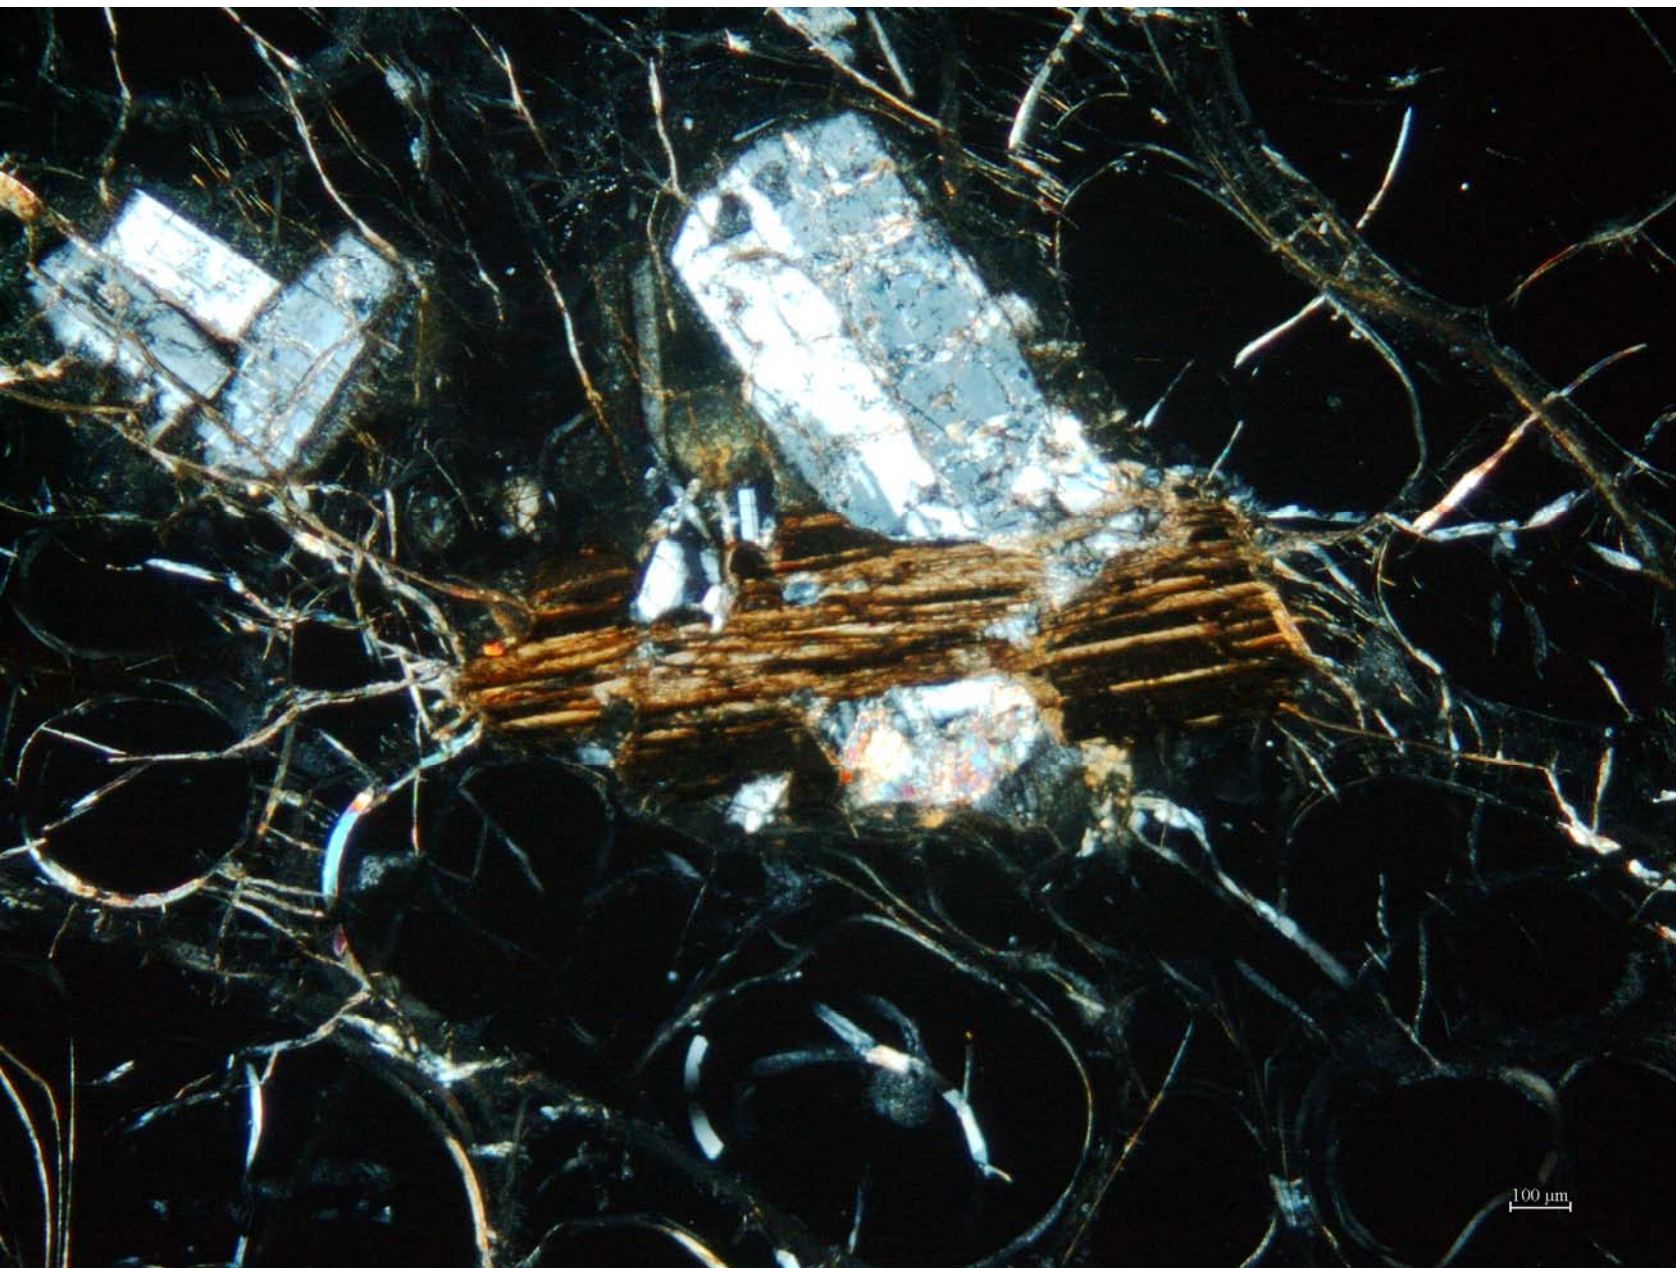

MEGT0318 – c2\_1

cross polarized light



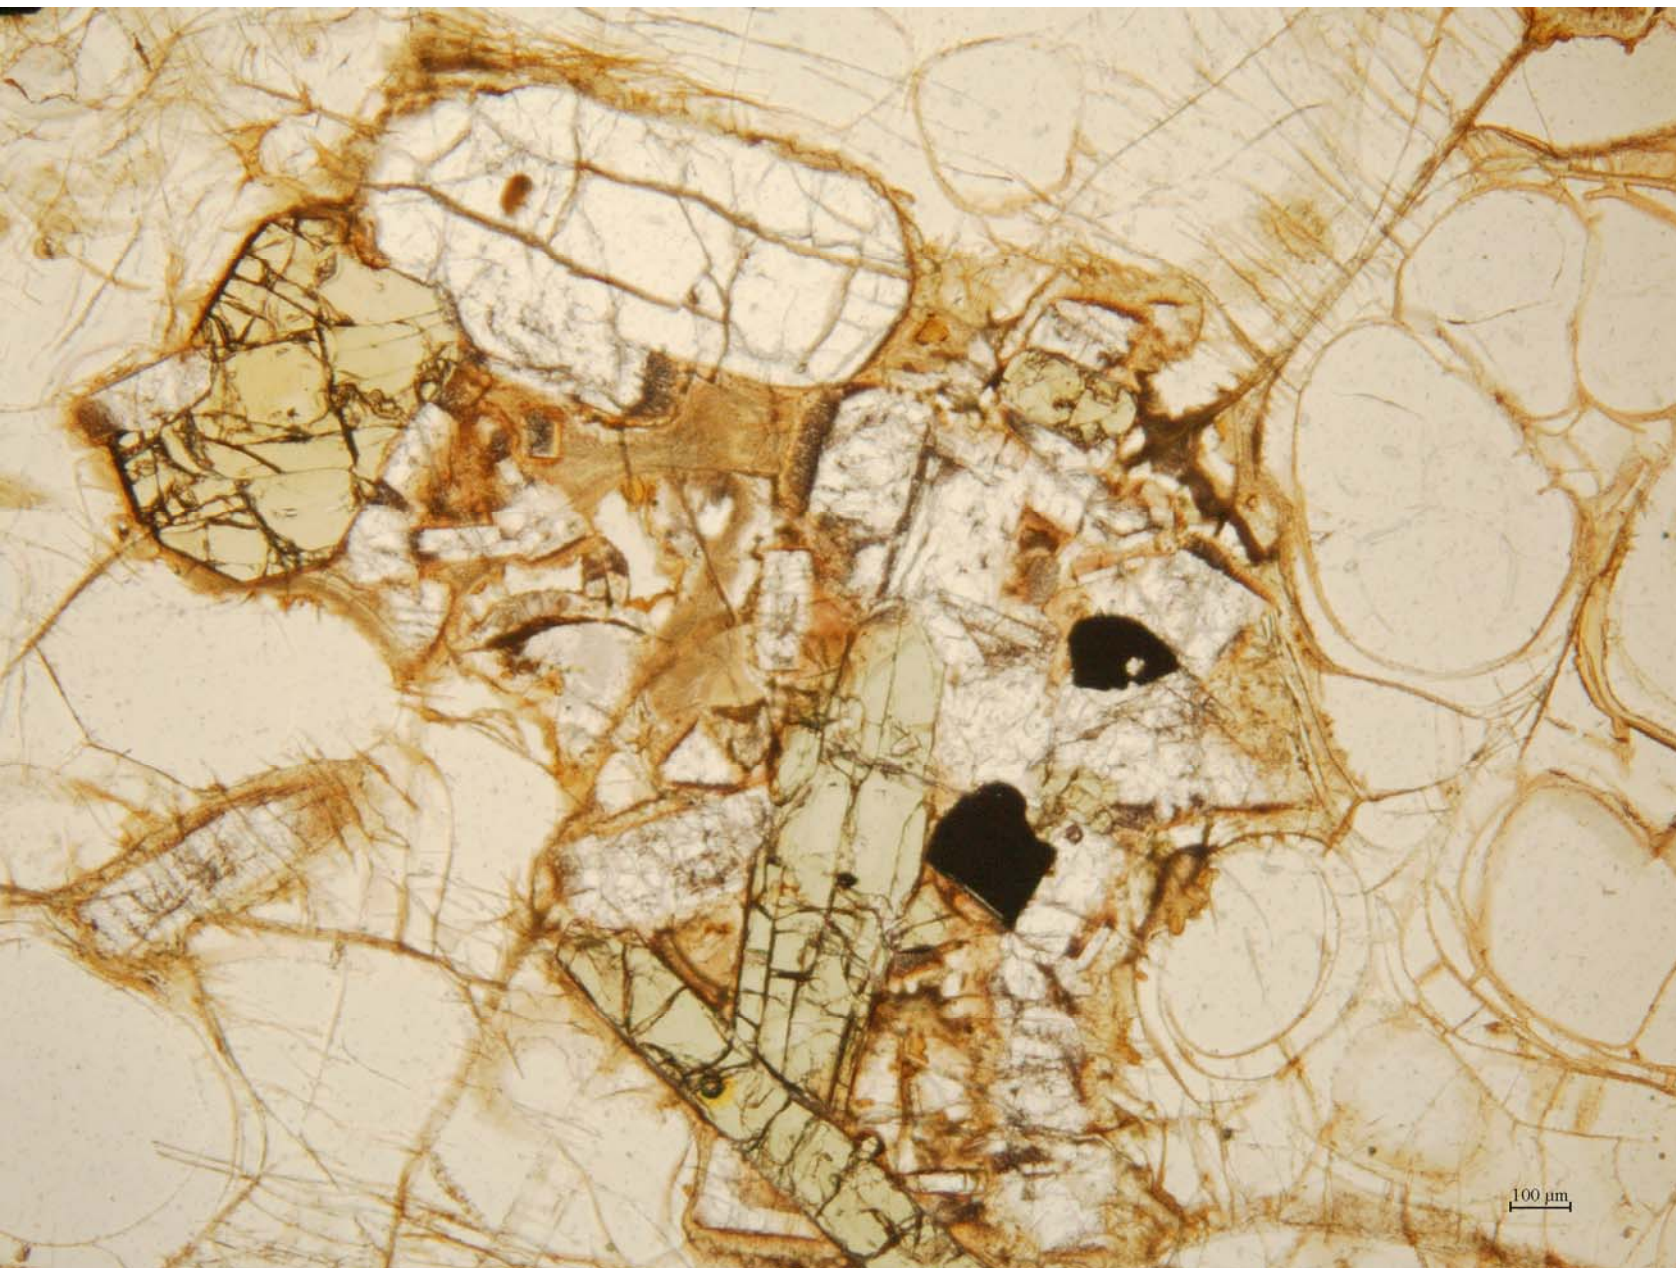

MEGT0318 - c3\_1

plane polarized light



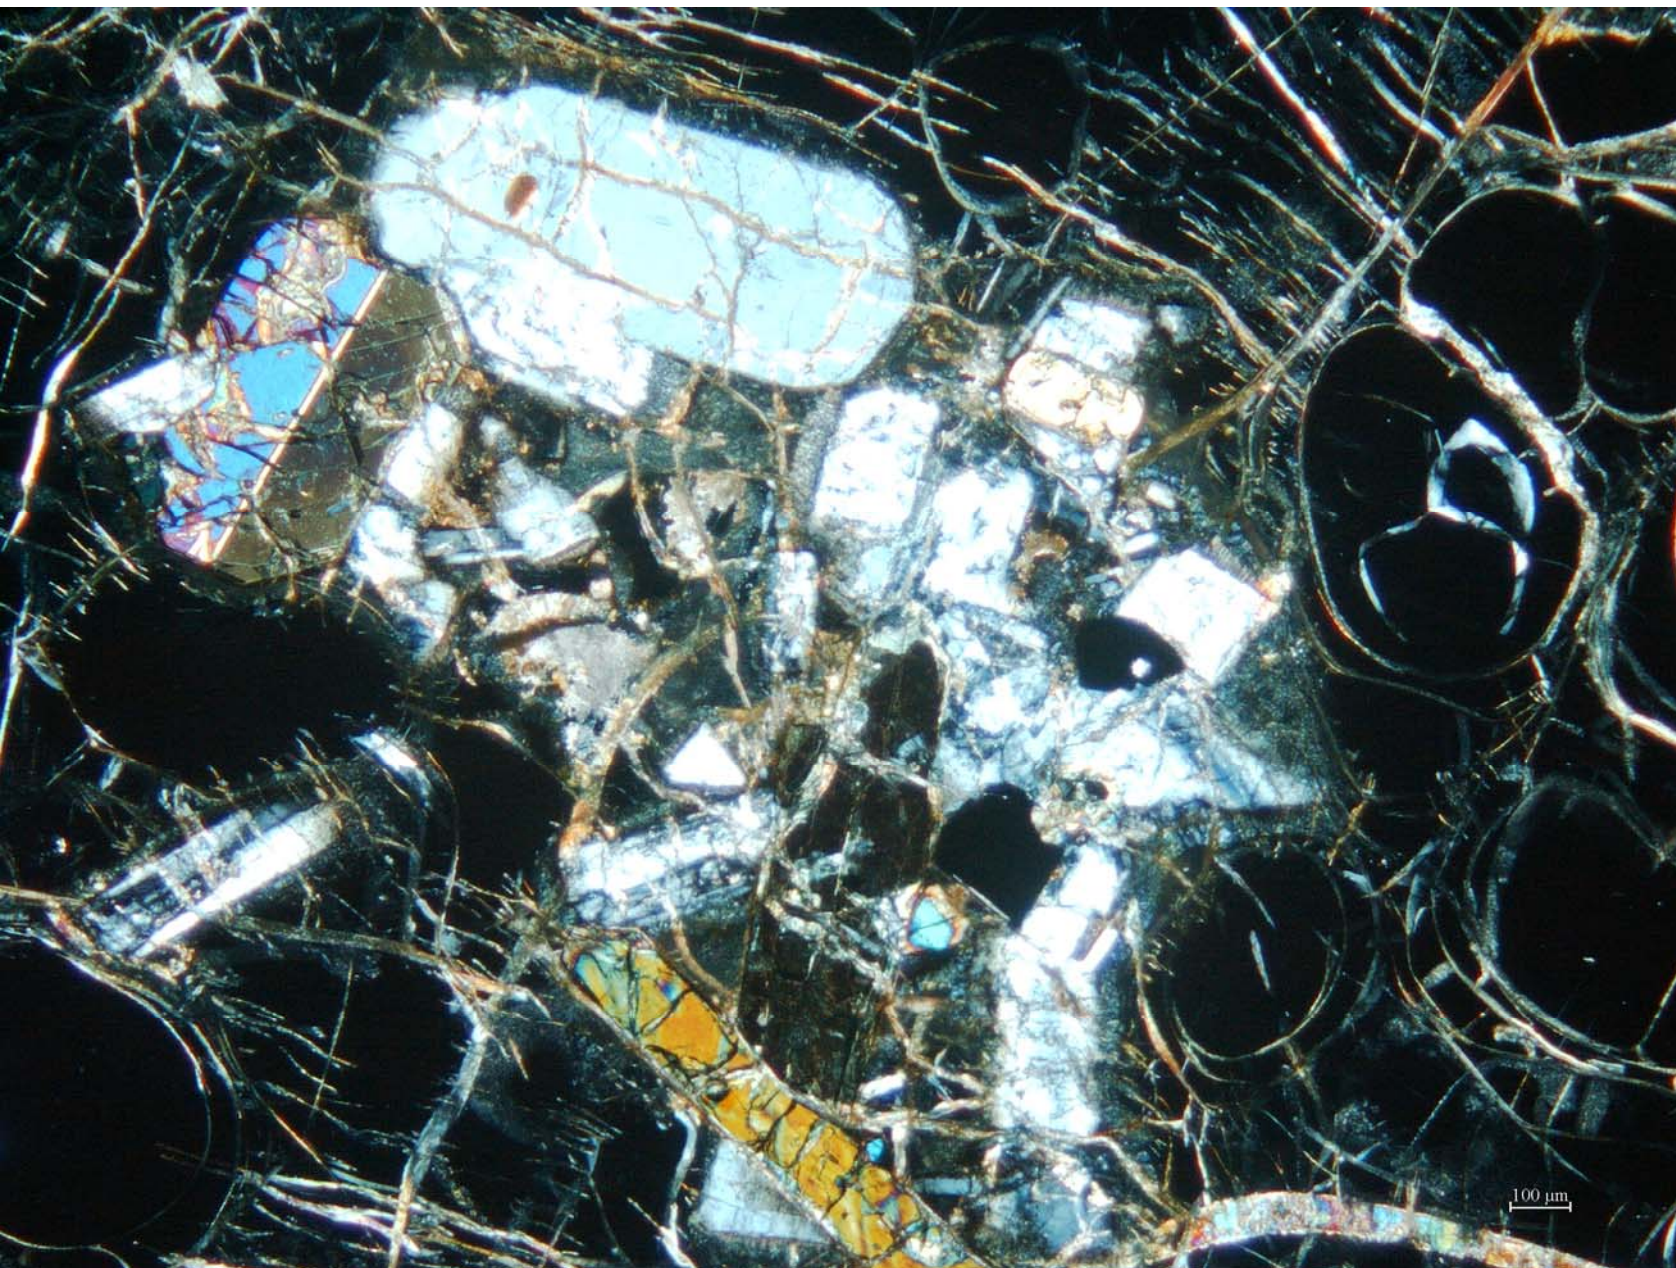

MEGT0318 – c3\_2

cross polarized light



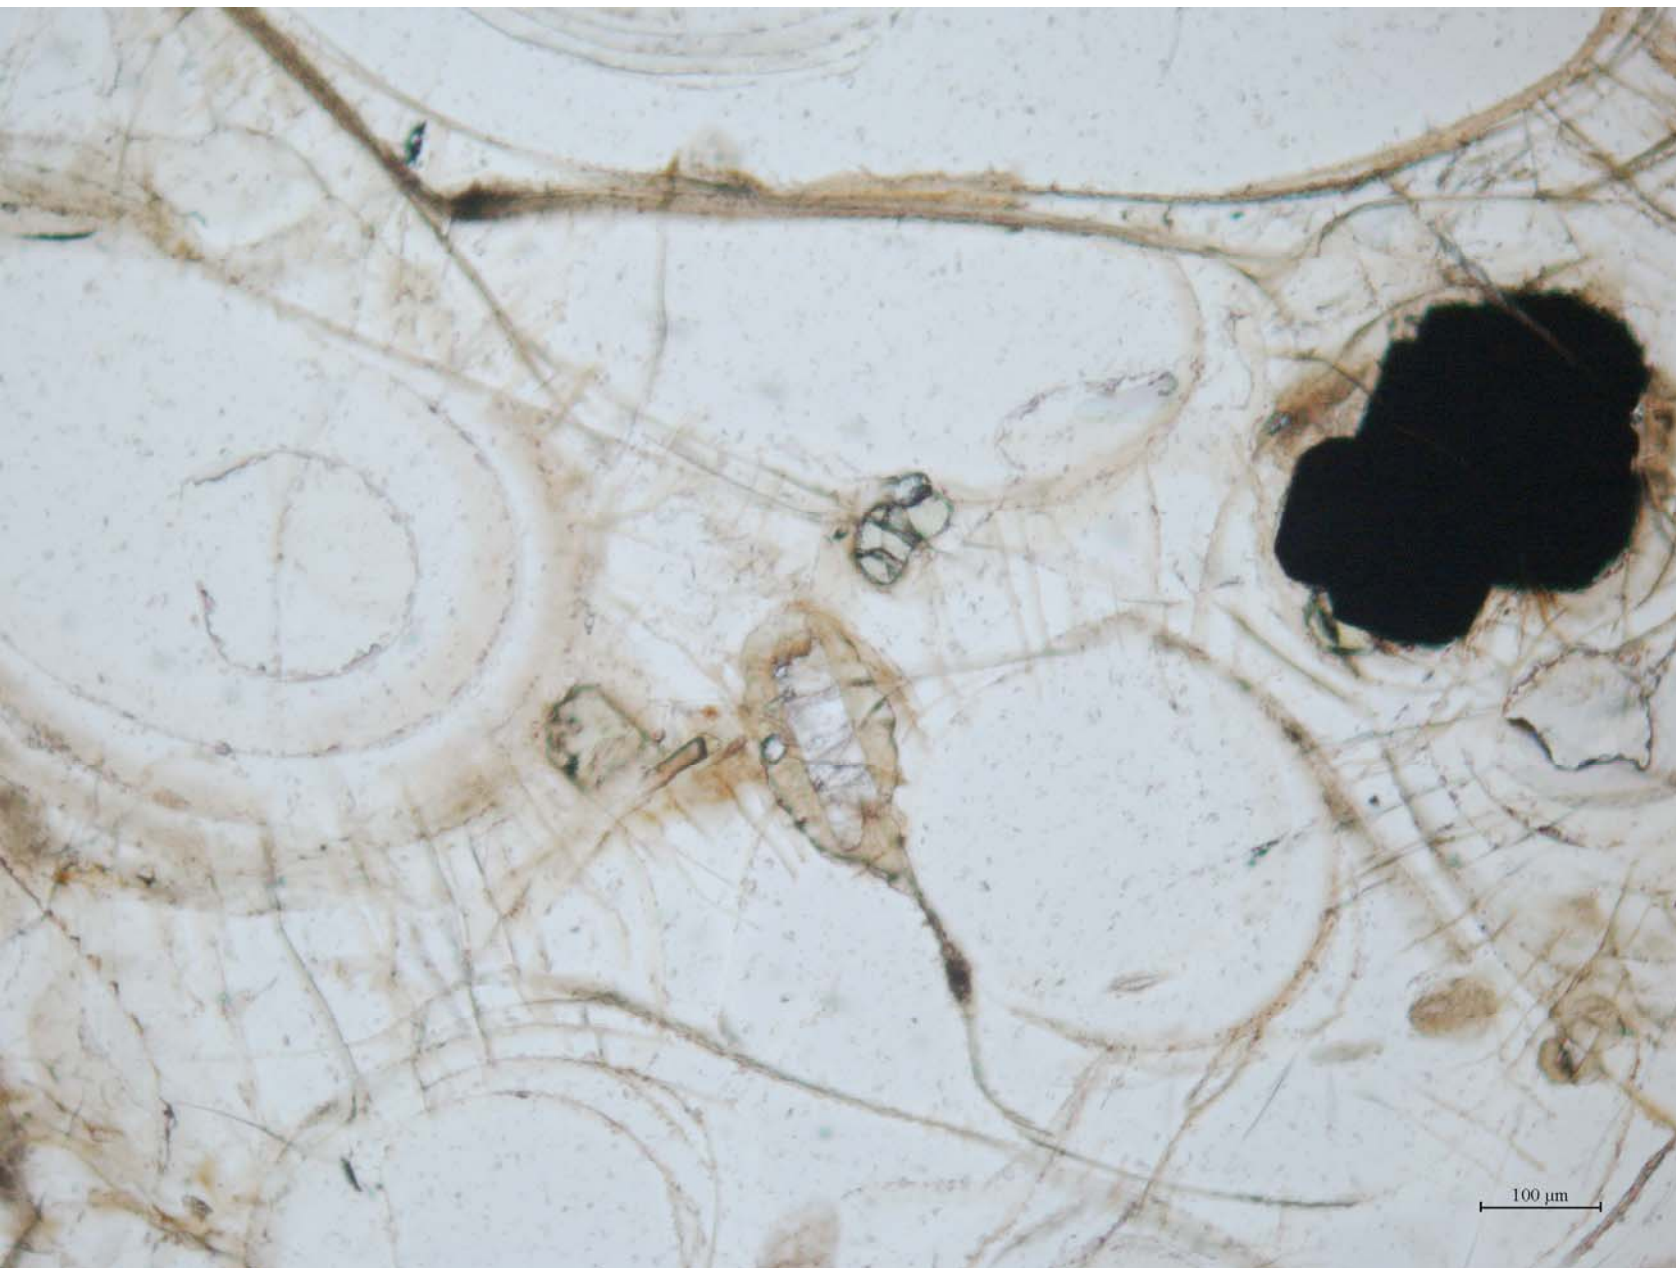

MEGT0318 – c4\_1

plane polarized light



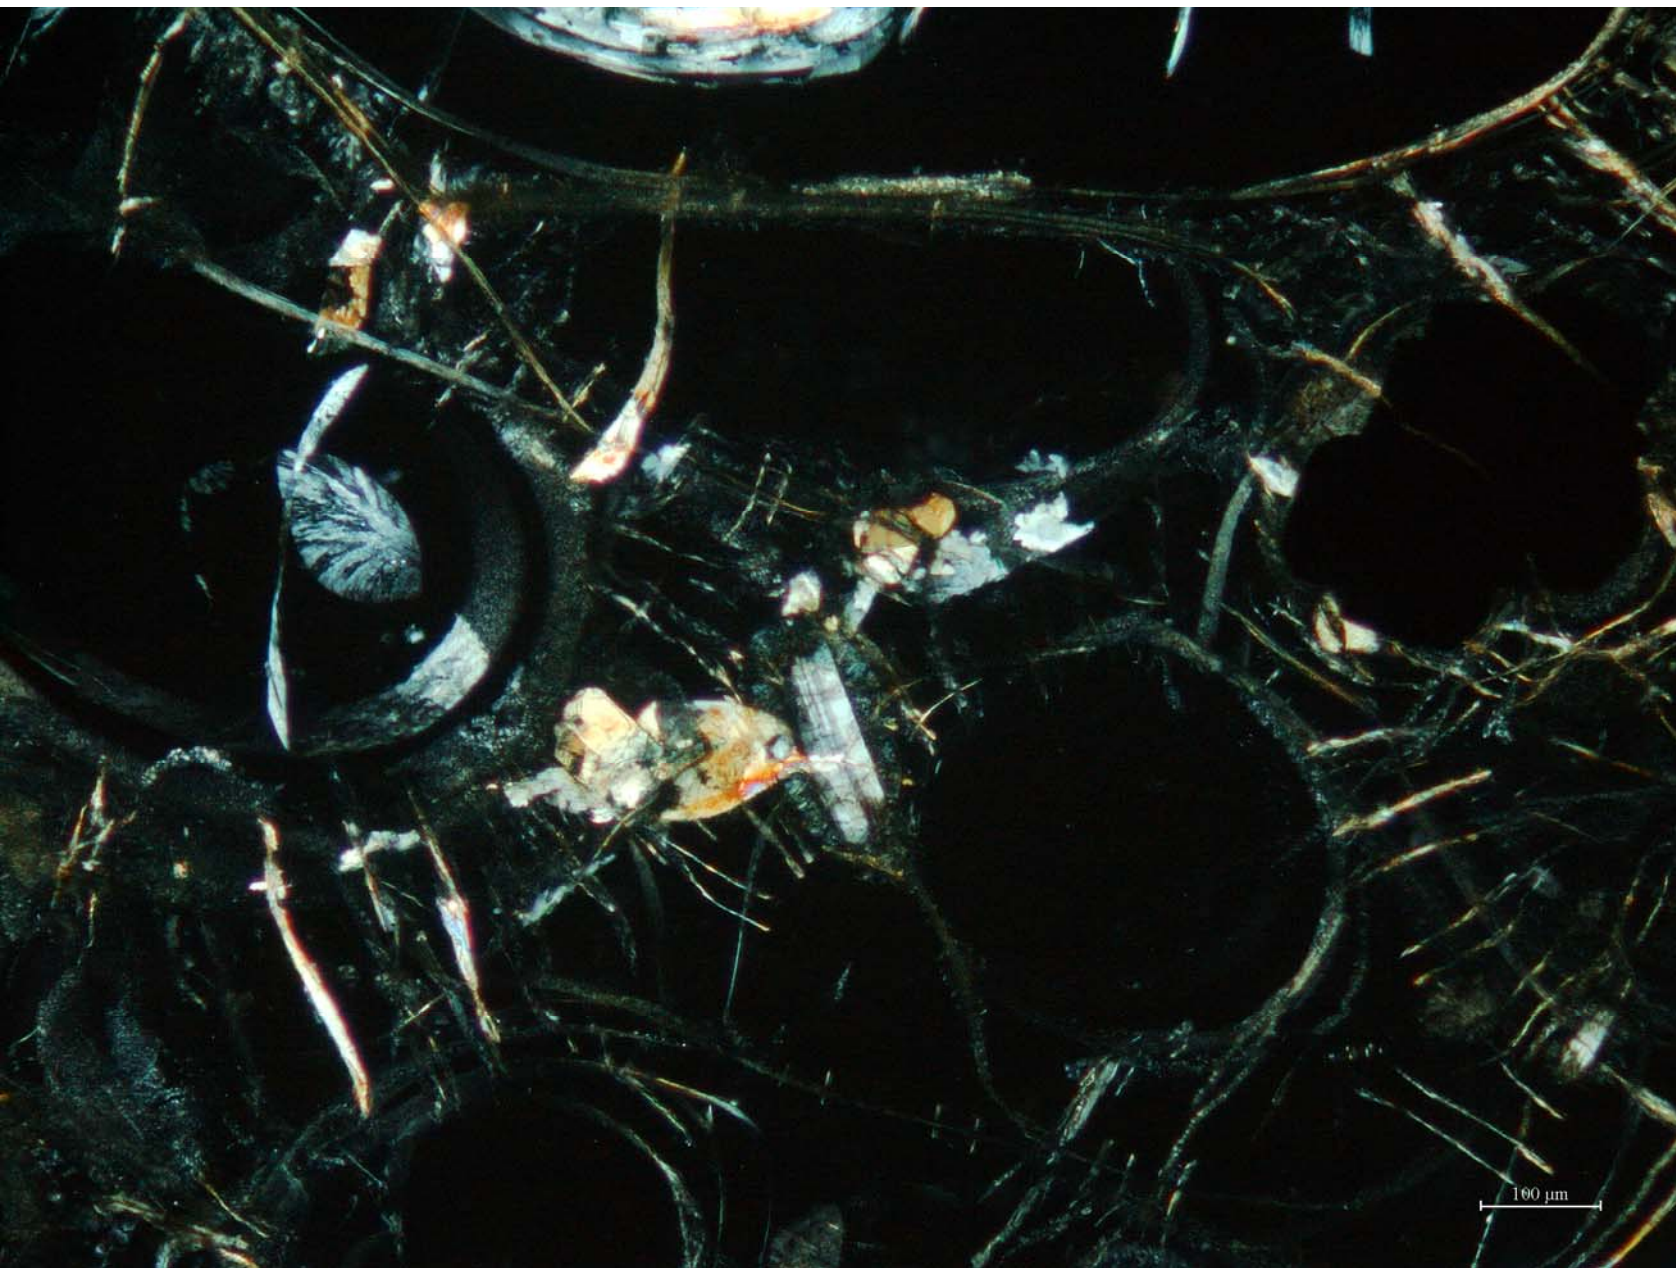

MEGT0318 – c4\_2

cross polarized light



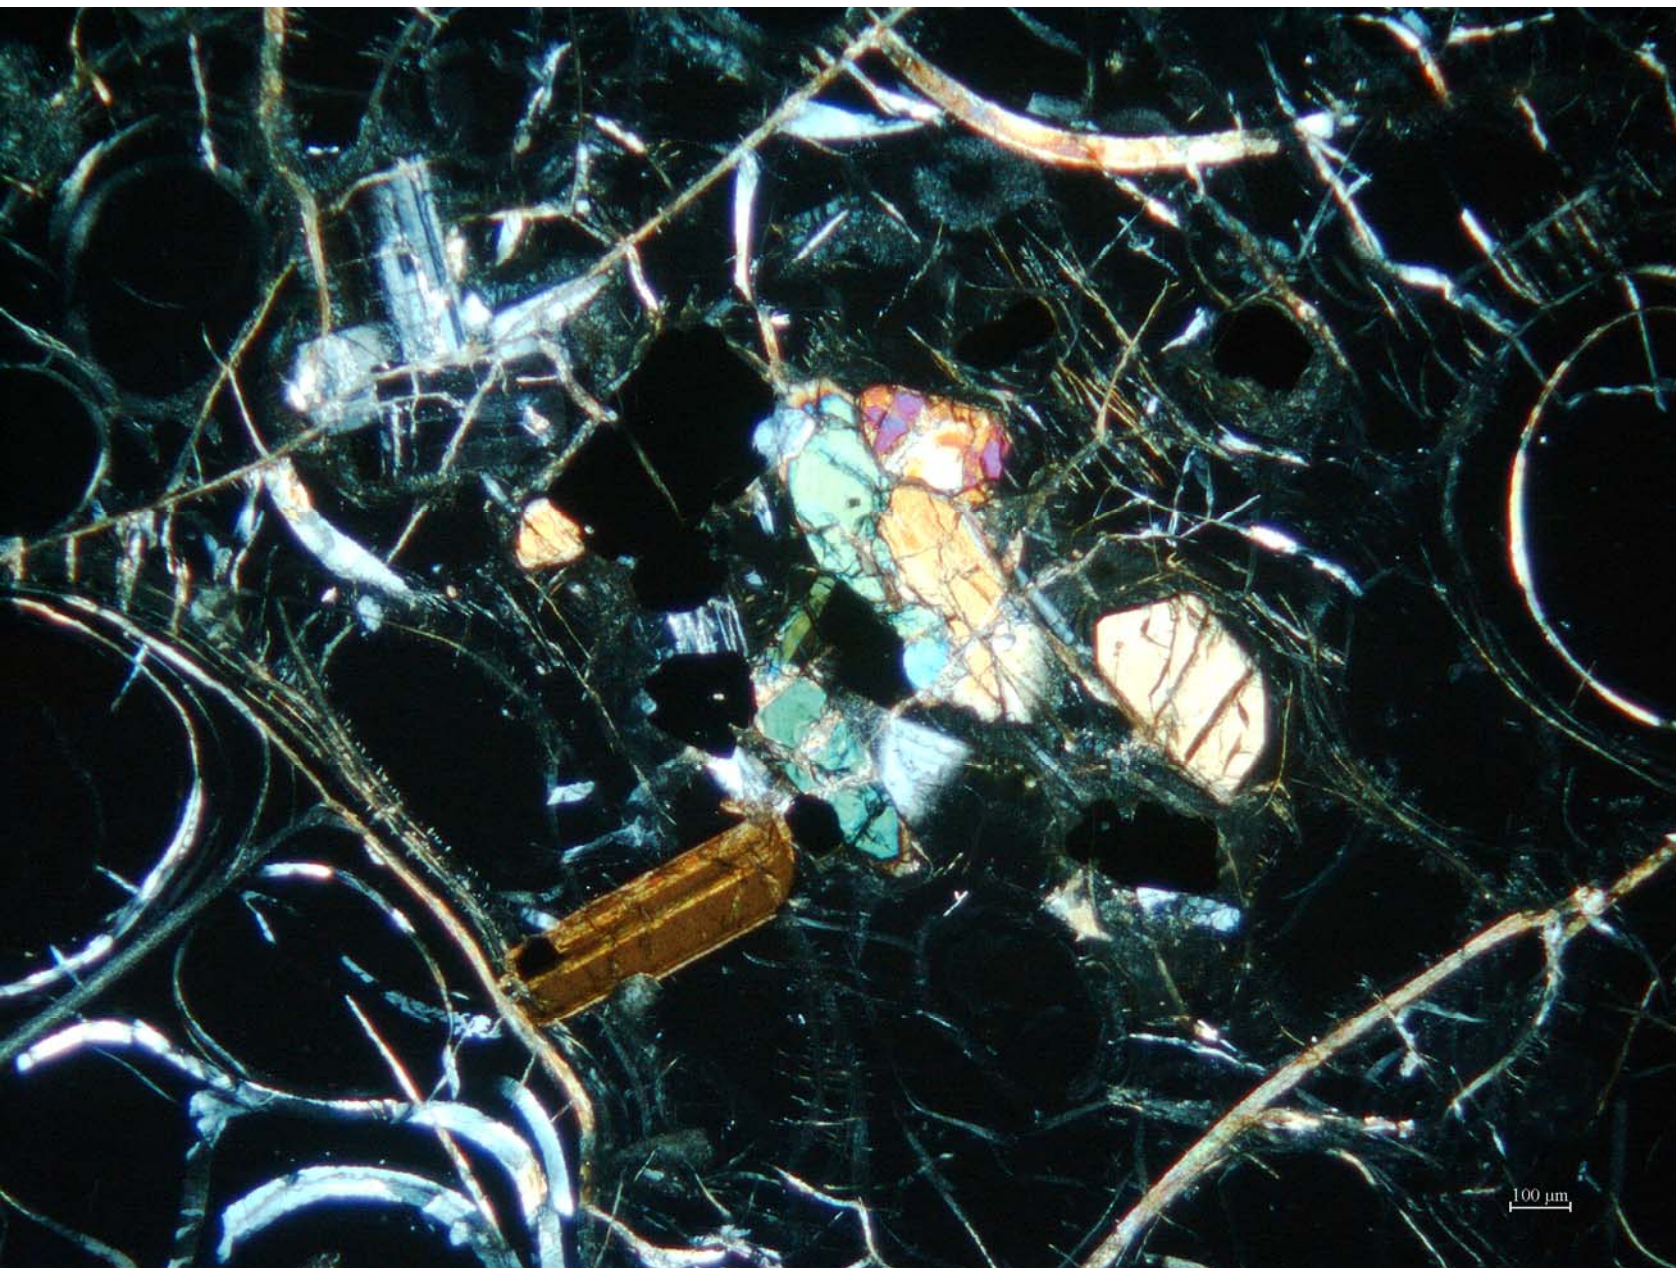

MEGT0318 – c5\_2

cross polarized light



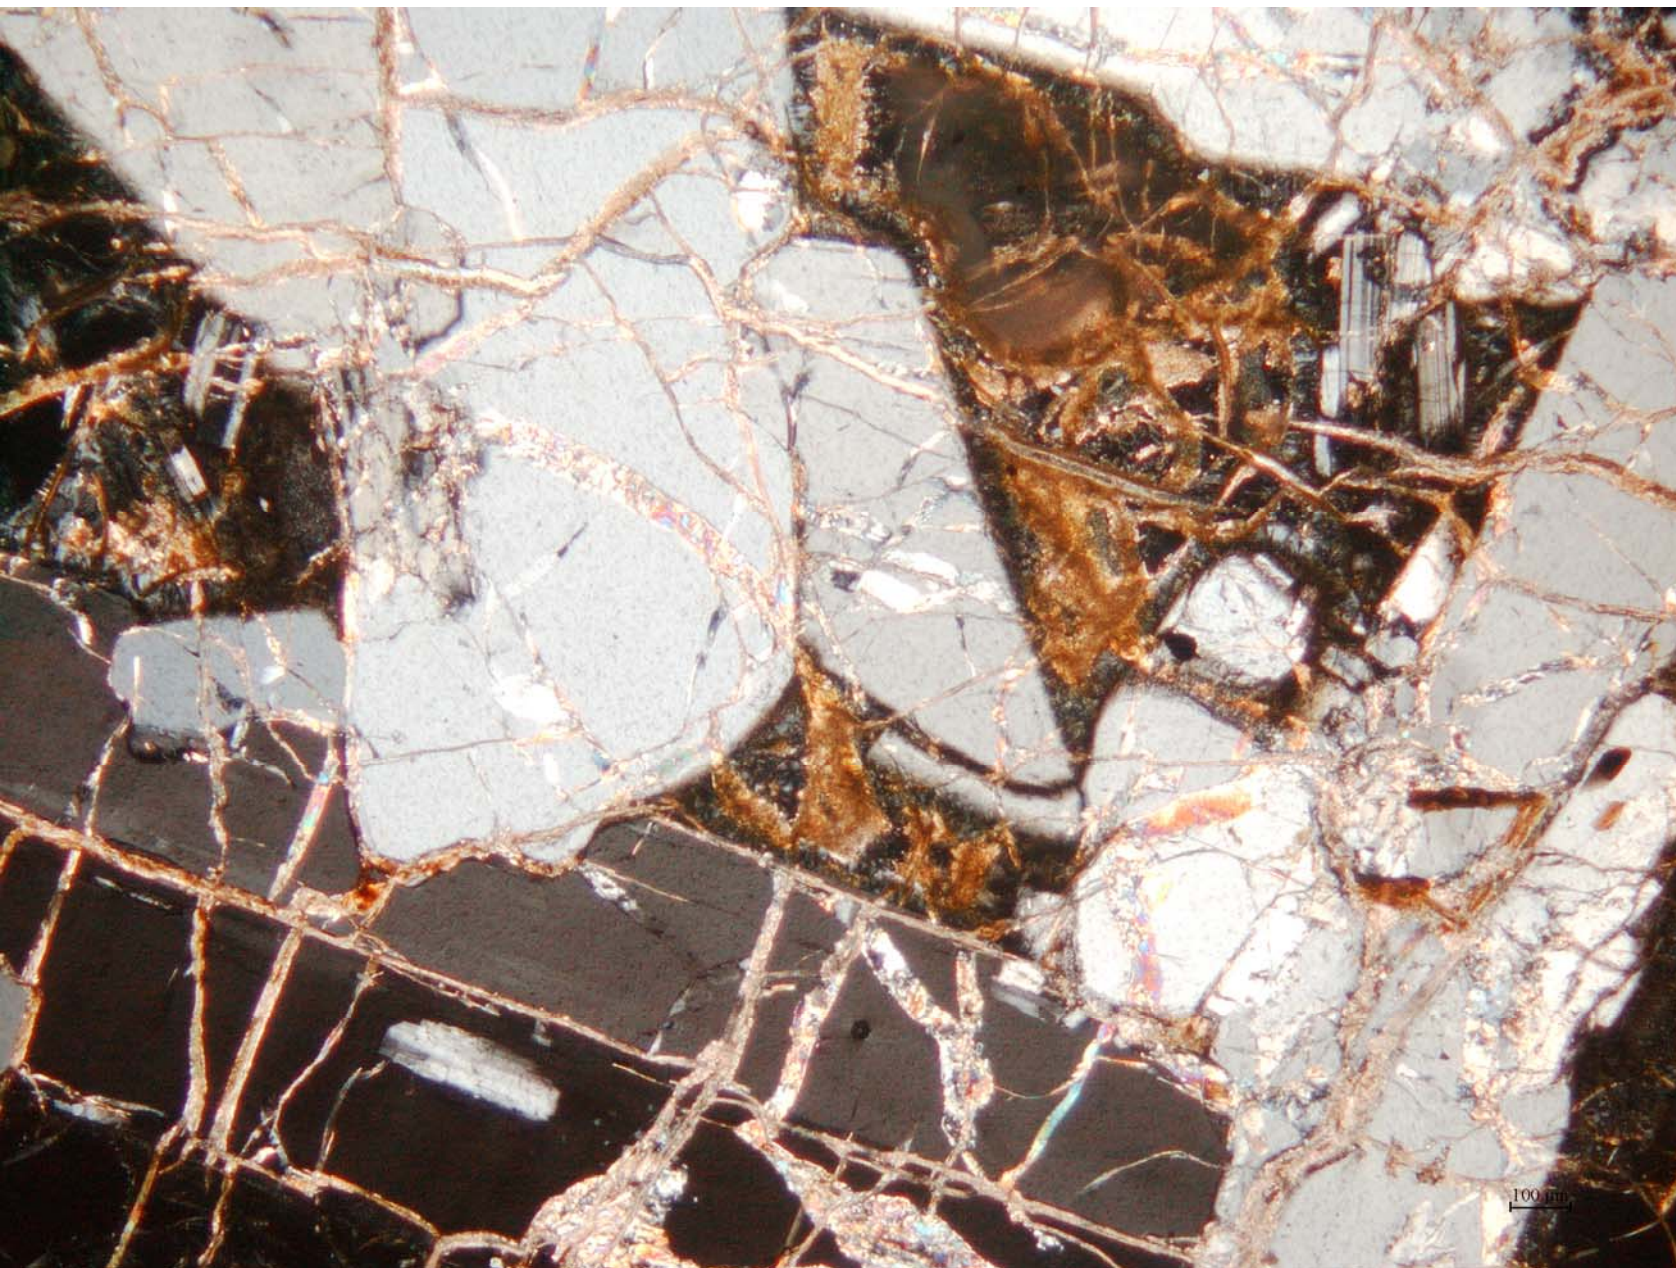

MEGT0318 – c6\_1

cross polarized light



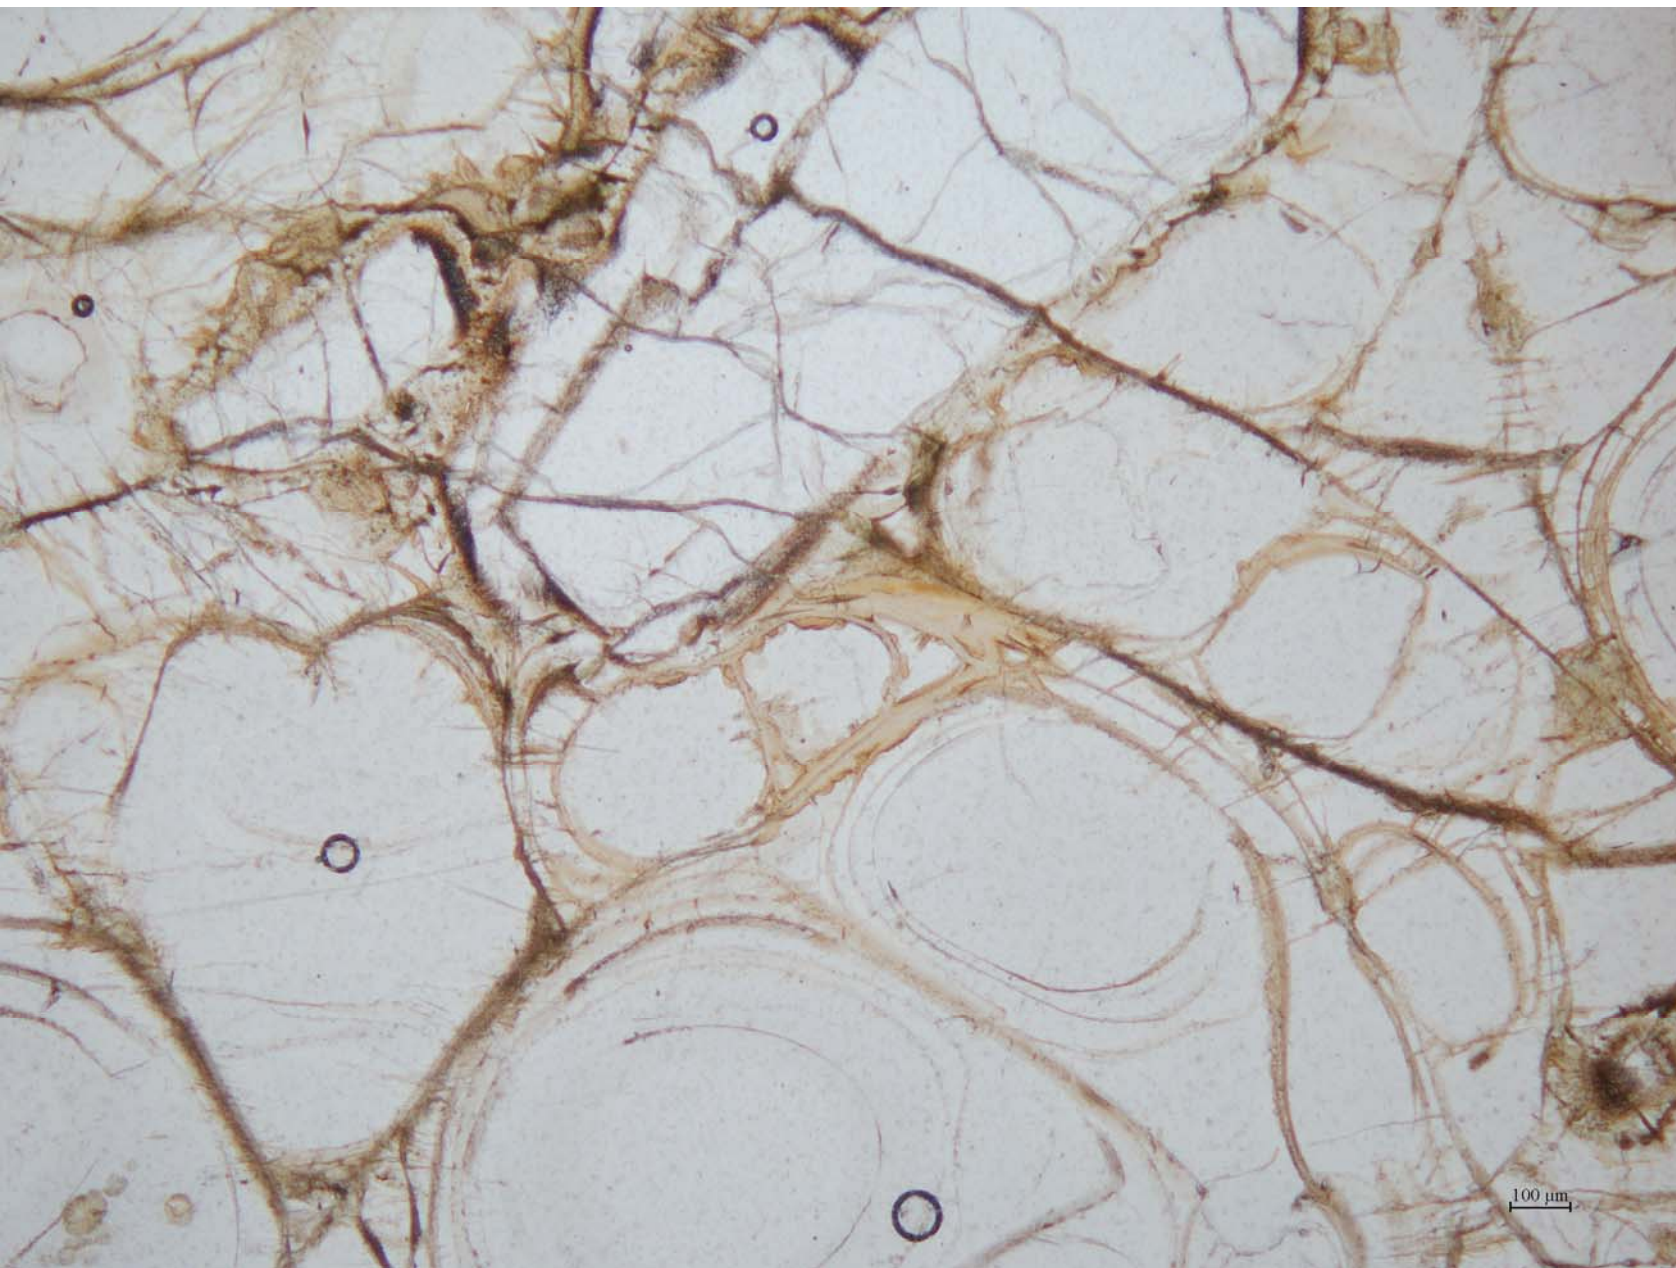

MEGT0318 – c7\_1

plane polarized light



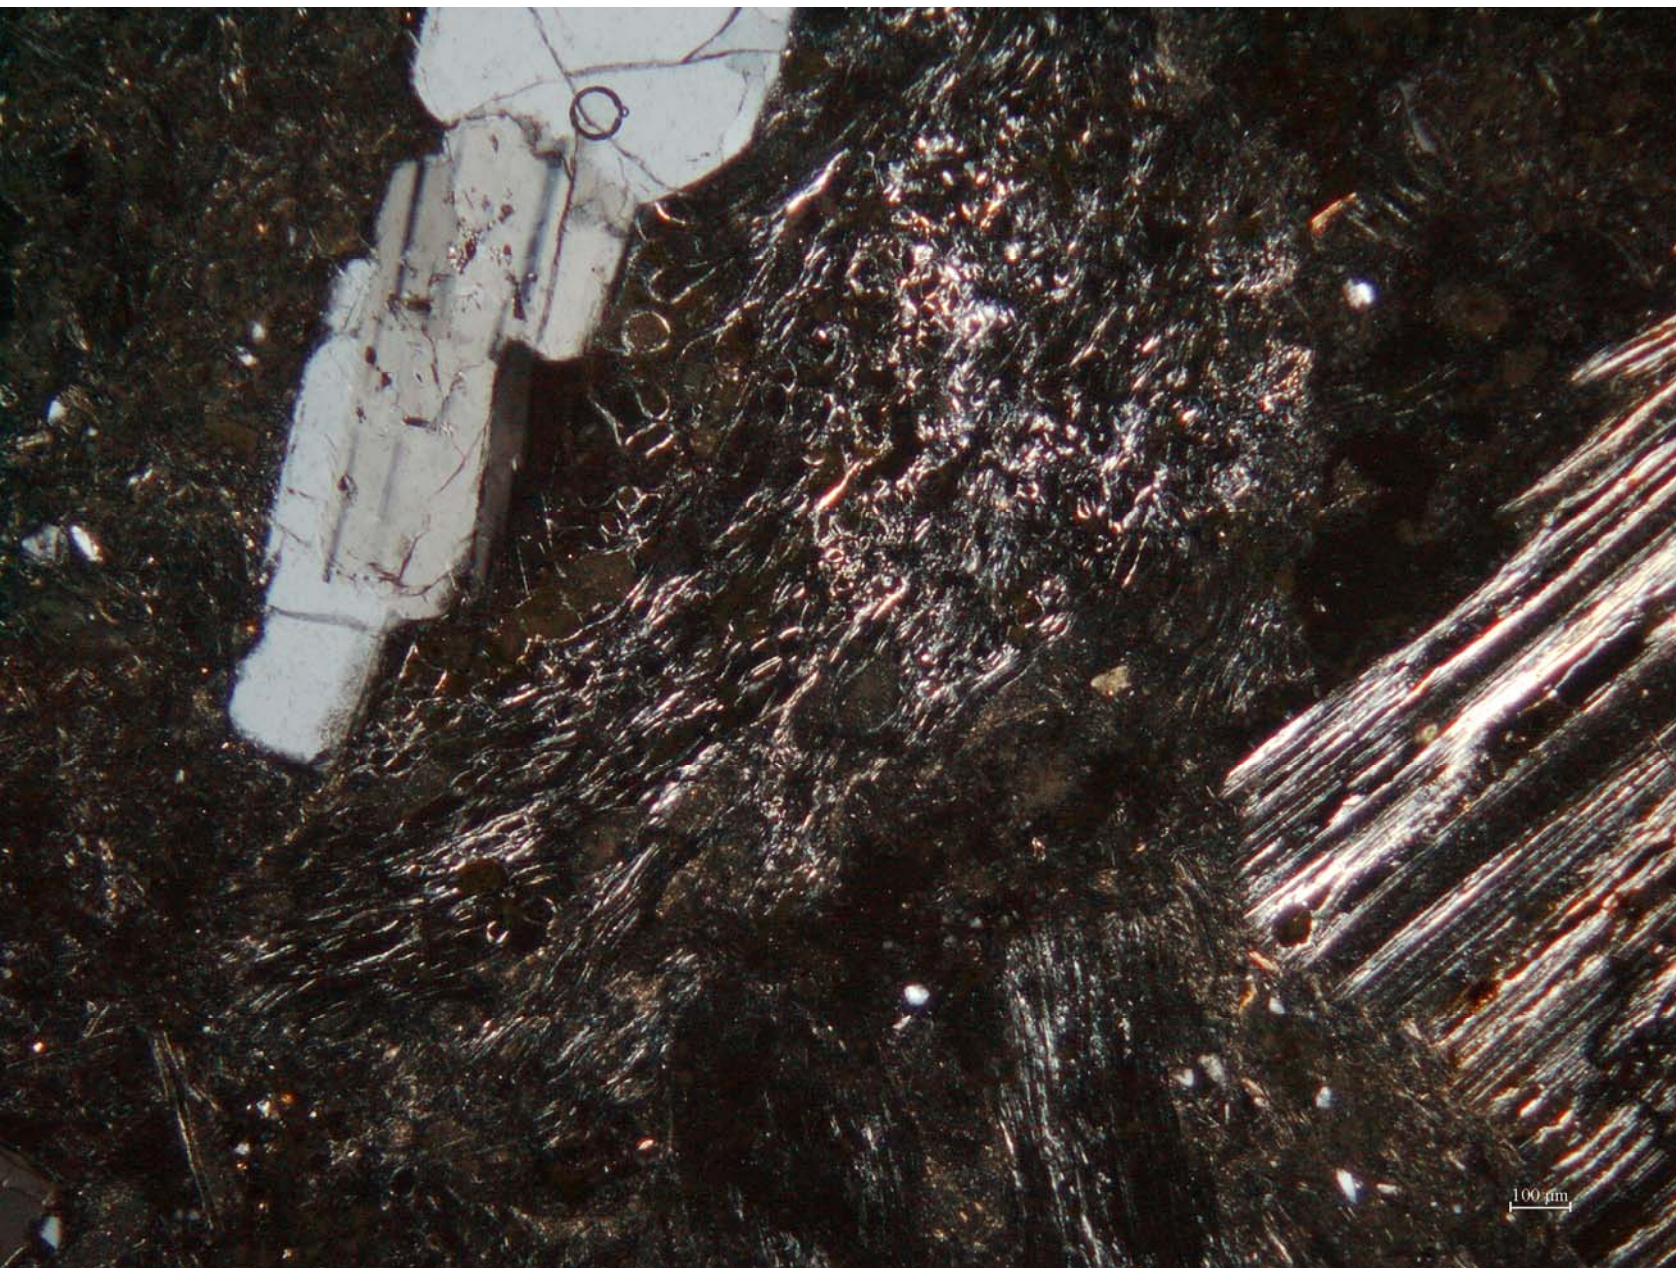

MEGT0322 – c1\_1

cross polarized light



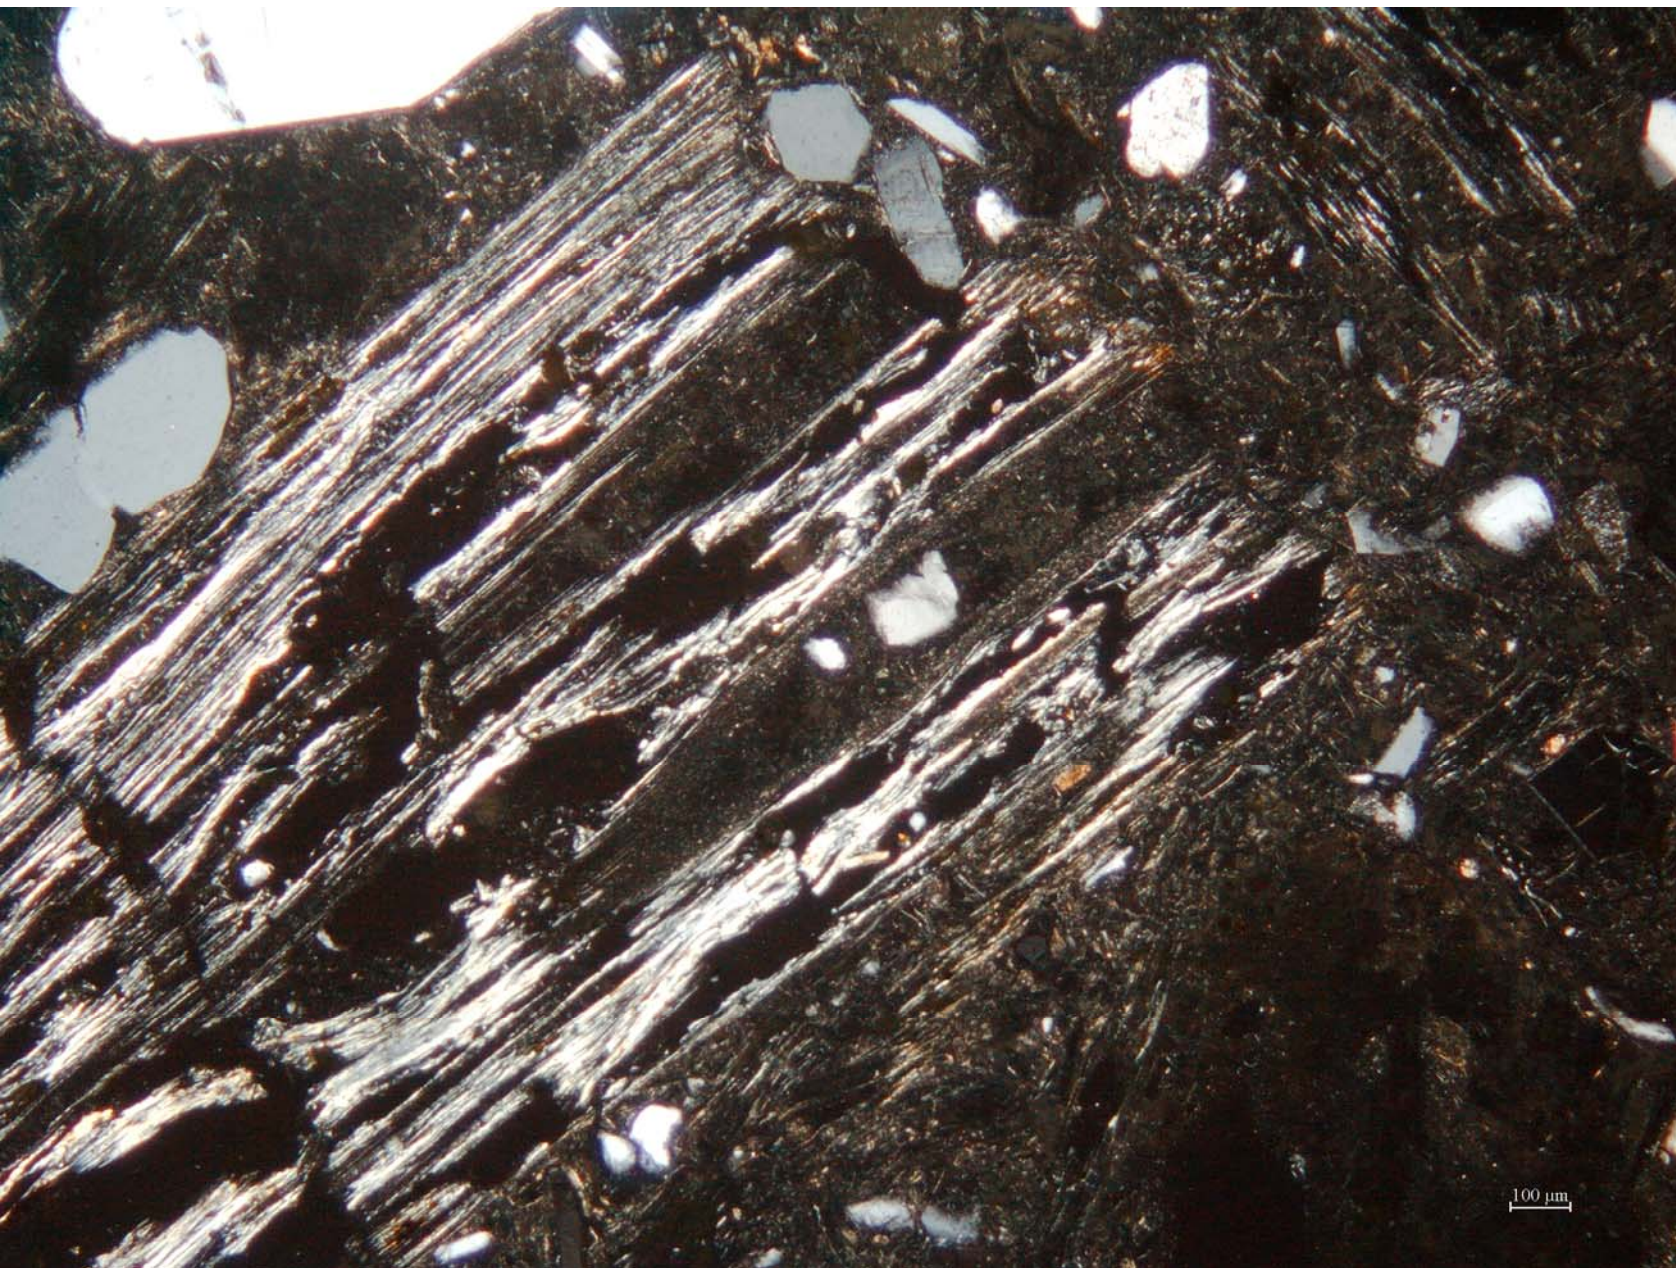

MEGT0322 – c1\_2

cross polarized light



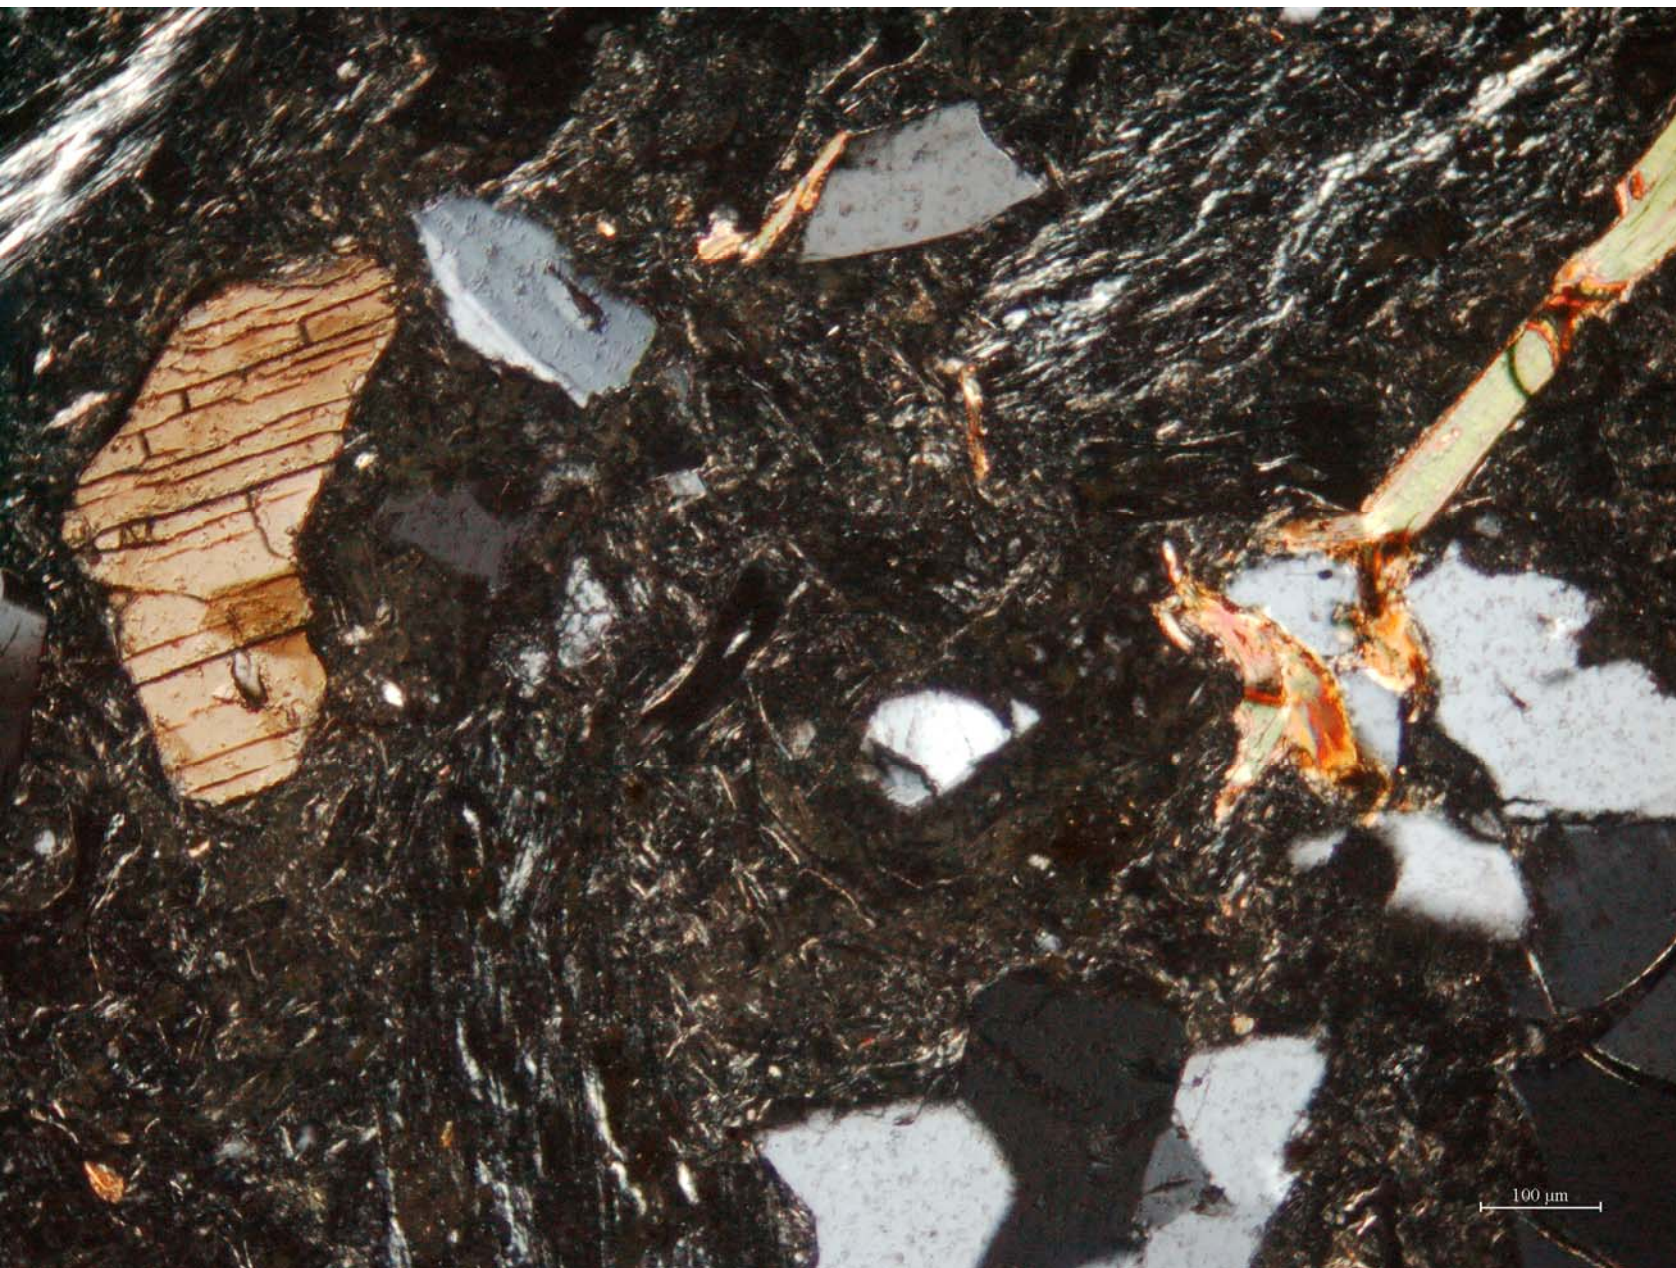

MEGT0322 – c2\_1

cross polarized light



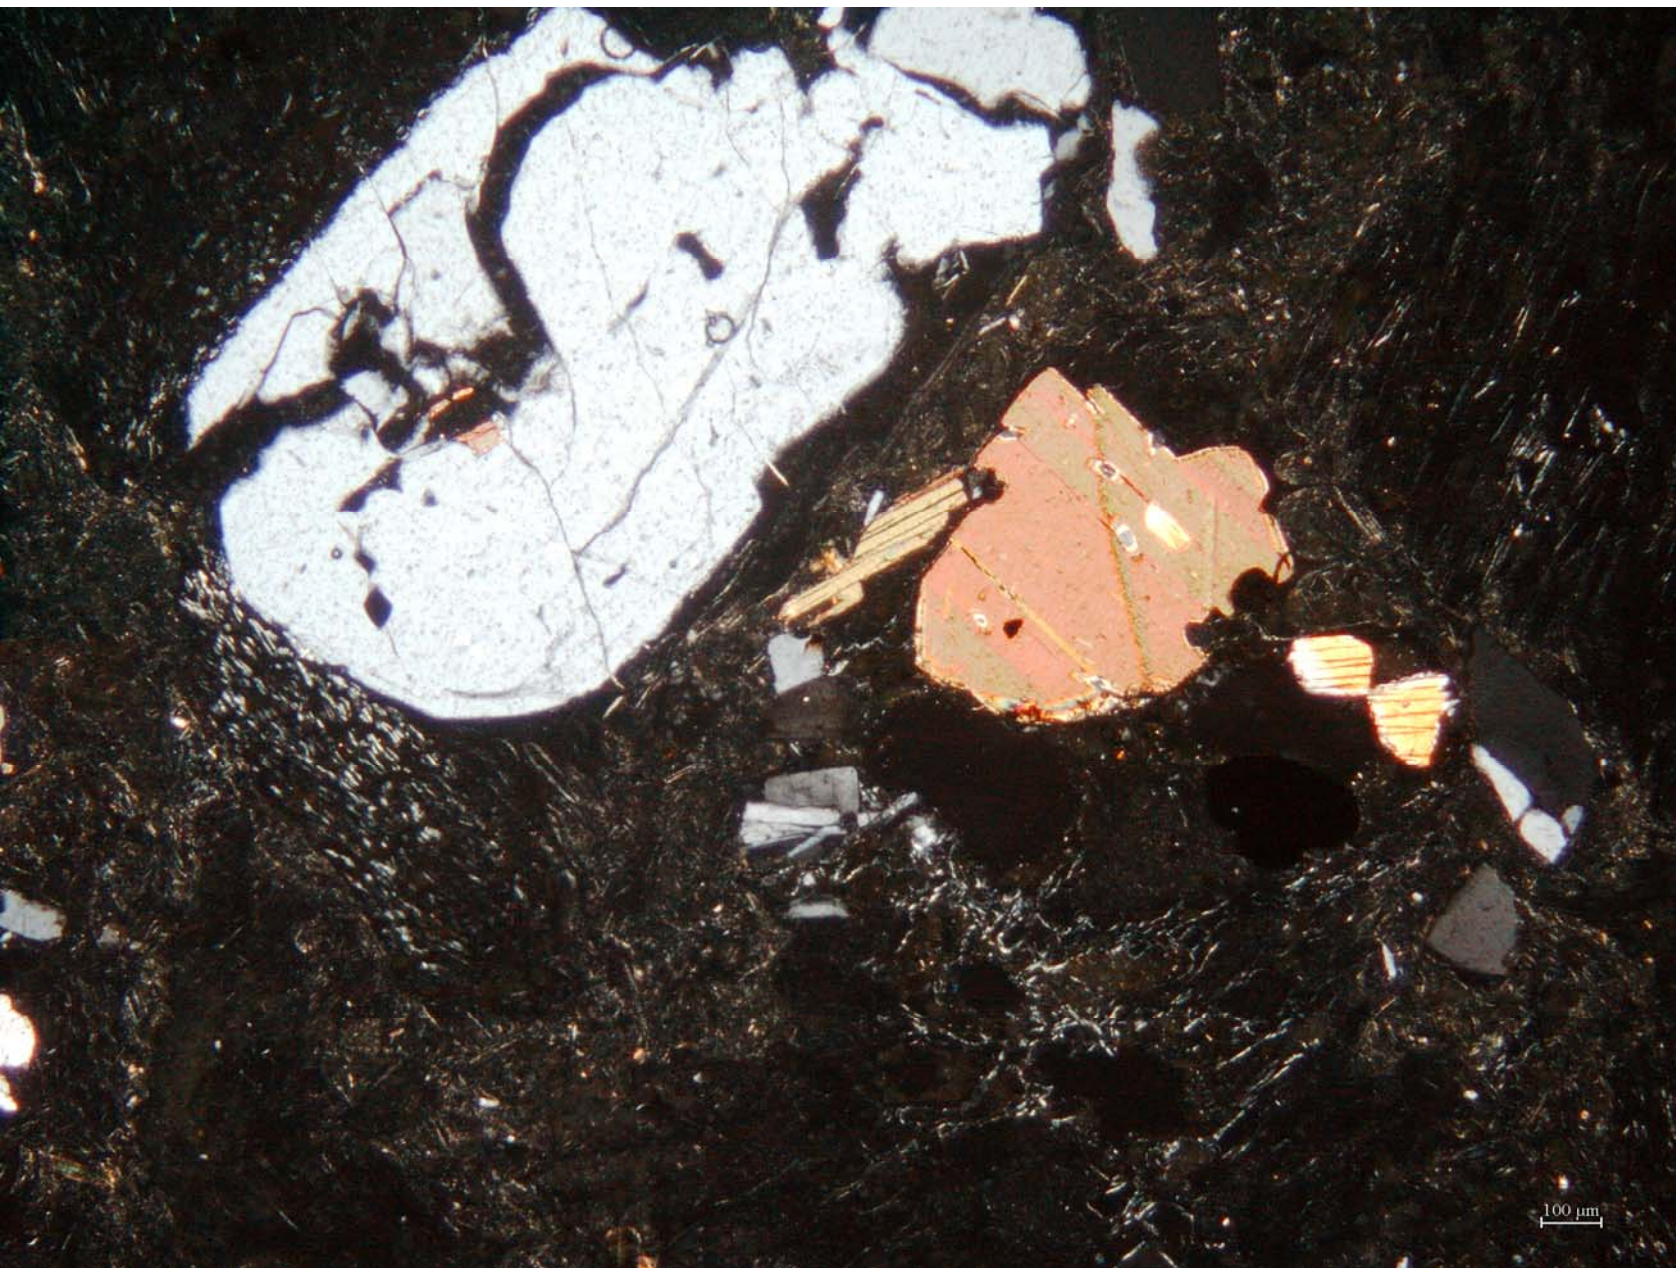

MEGT0322 – c3\_1

cross polarized light



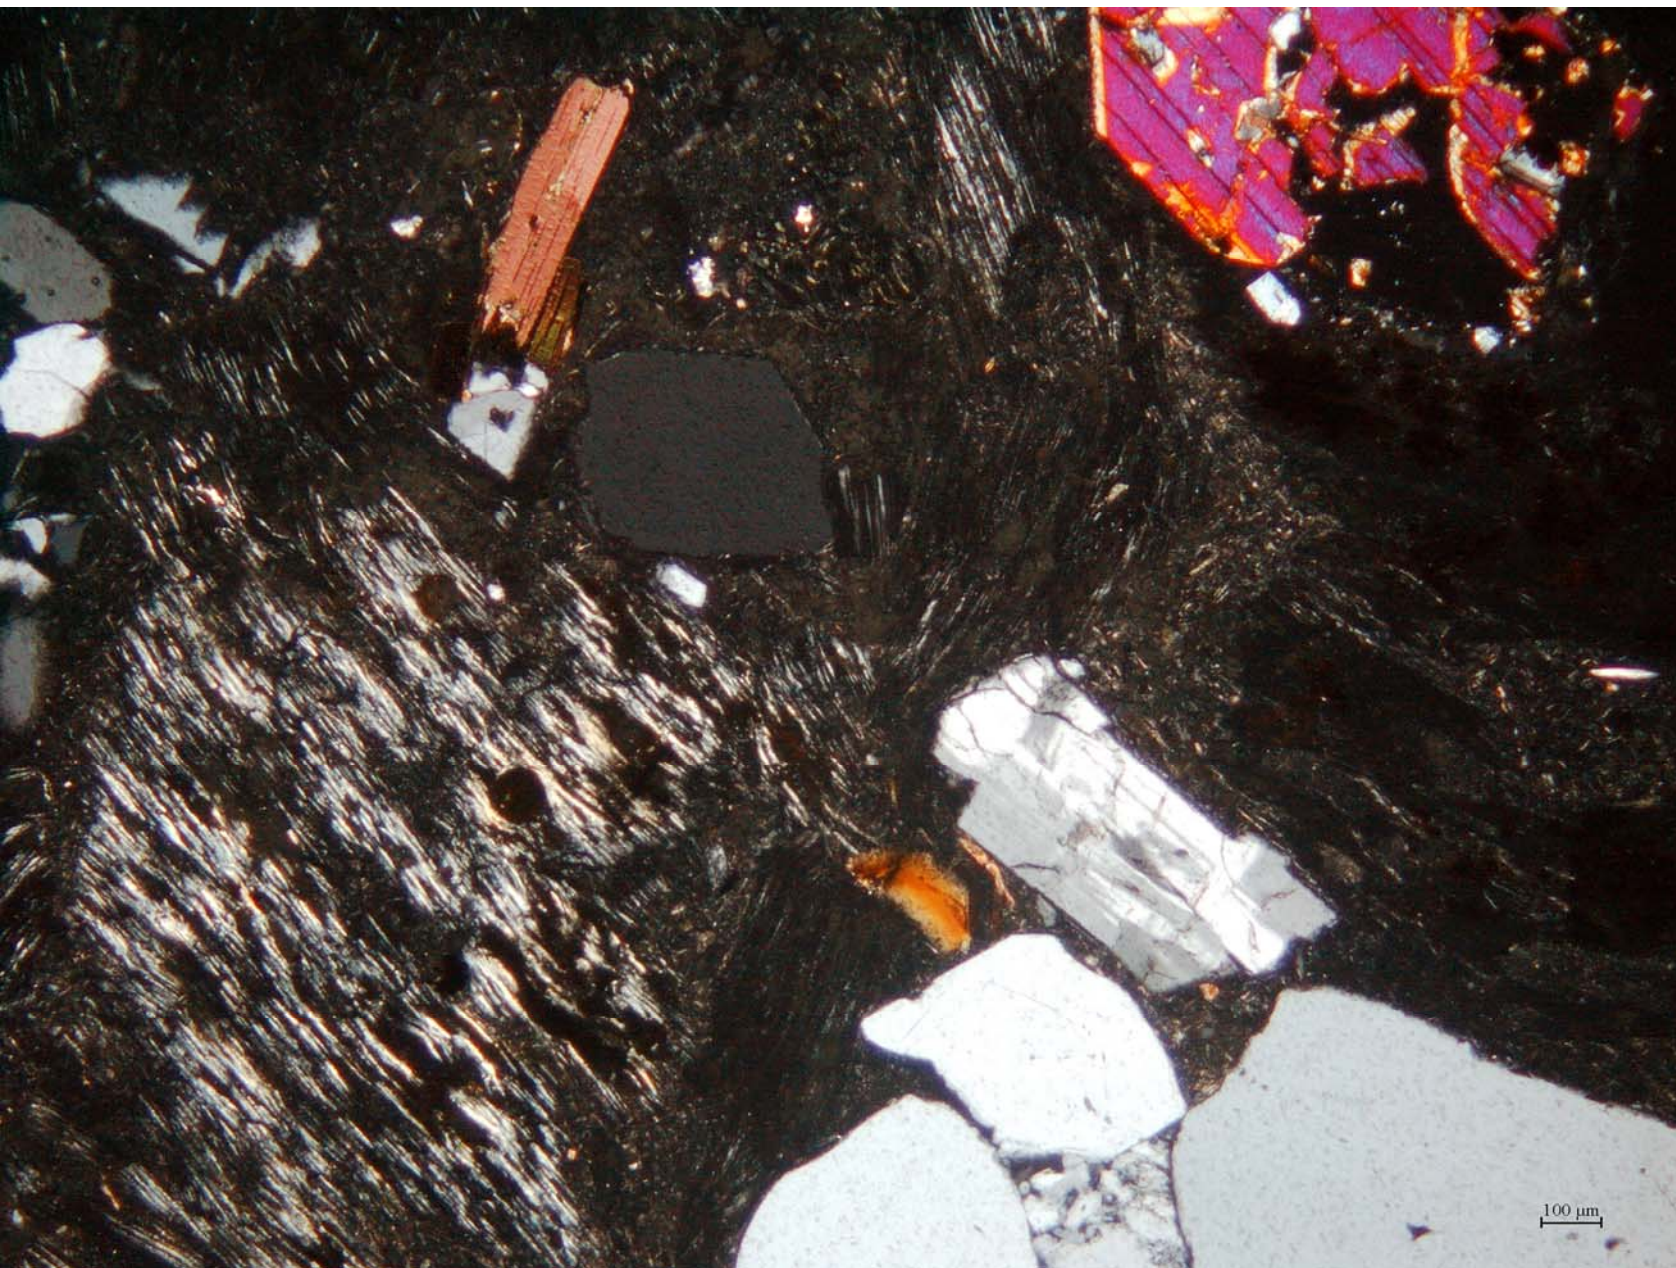

MEGT0322 – c4\_1

cross polarized light



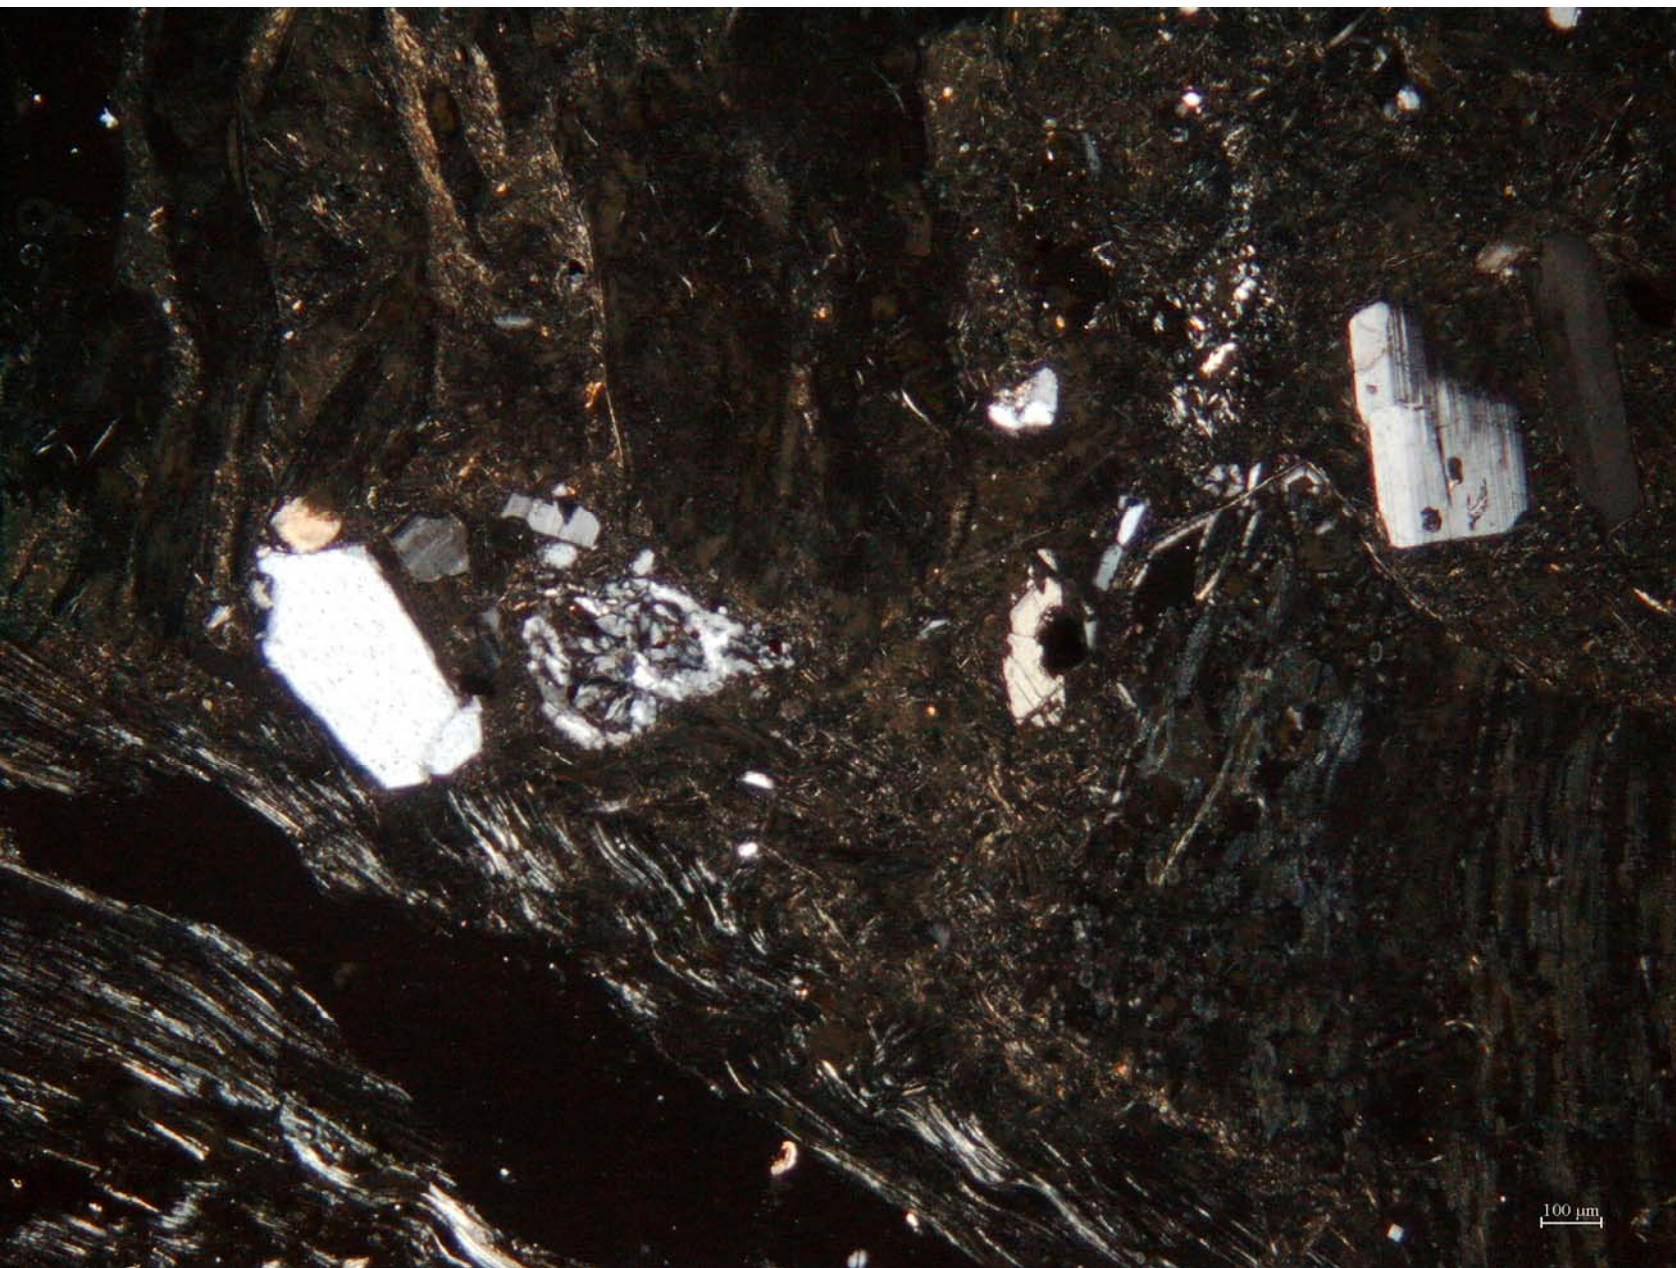

MEGT0322 – c5\_1

cross polarized light



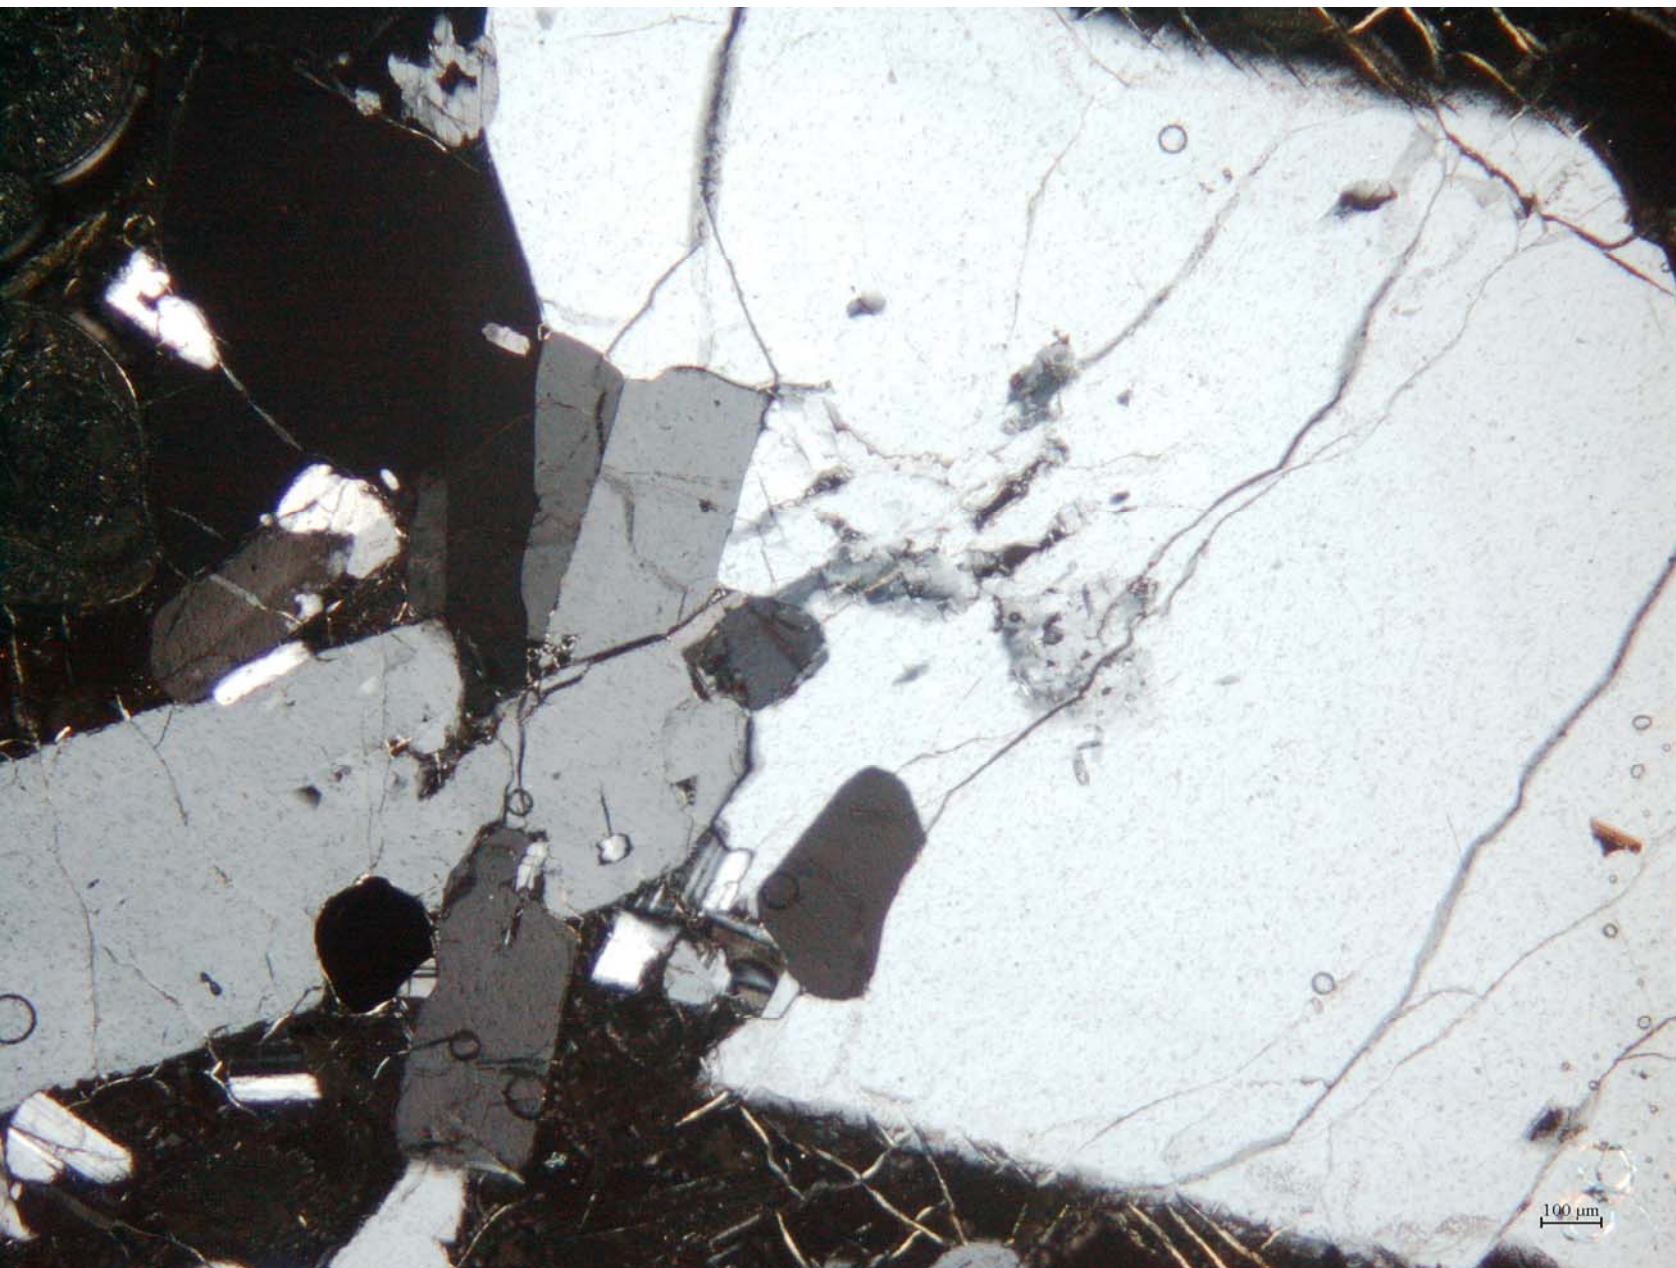

MEGT0322 – c5\_1bis

cross polarized light



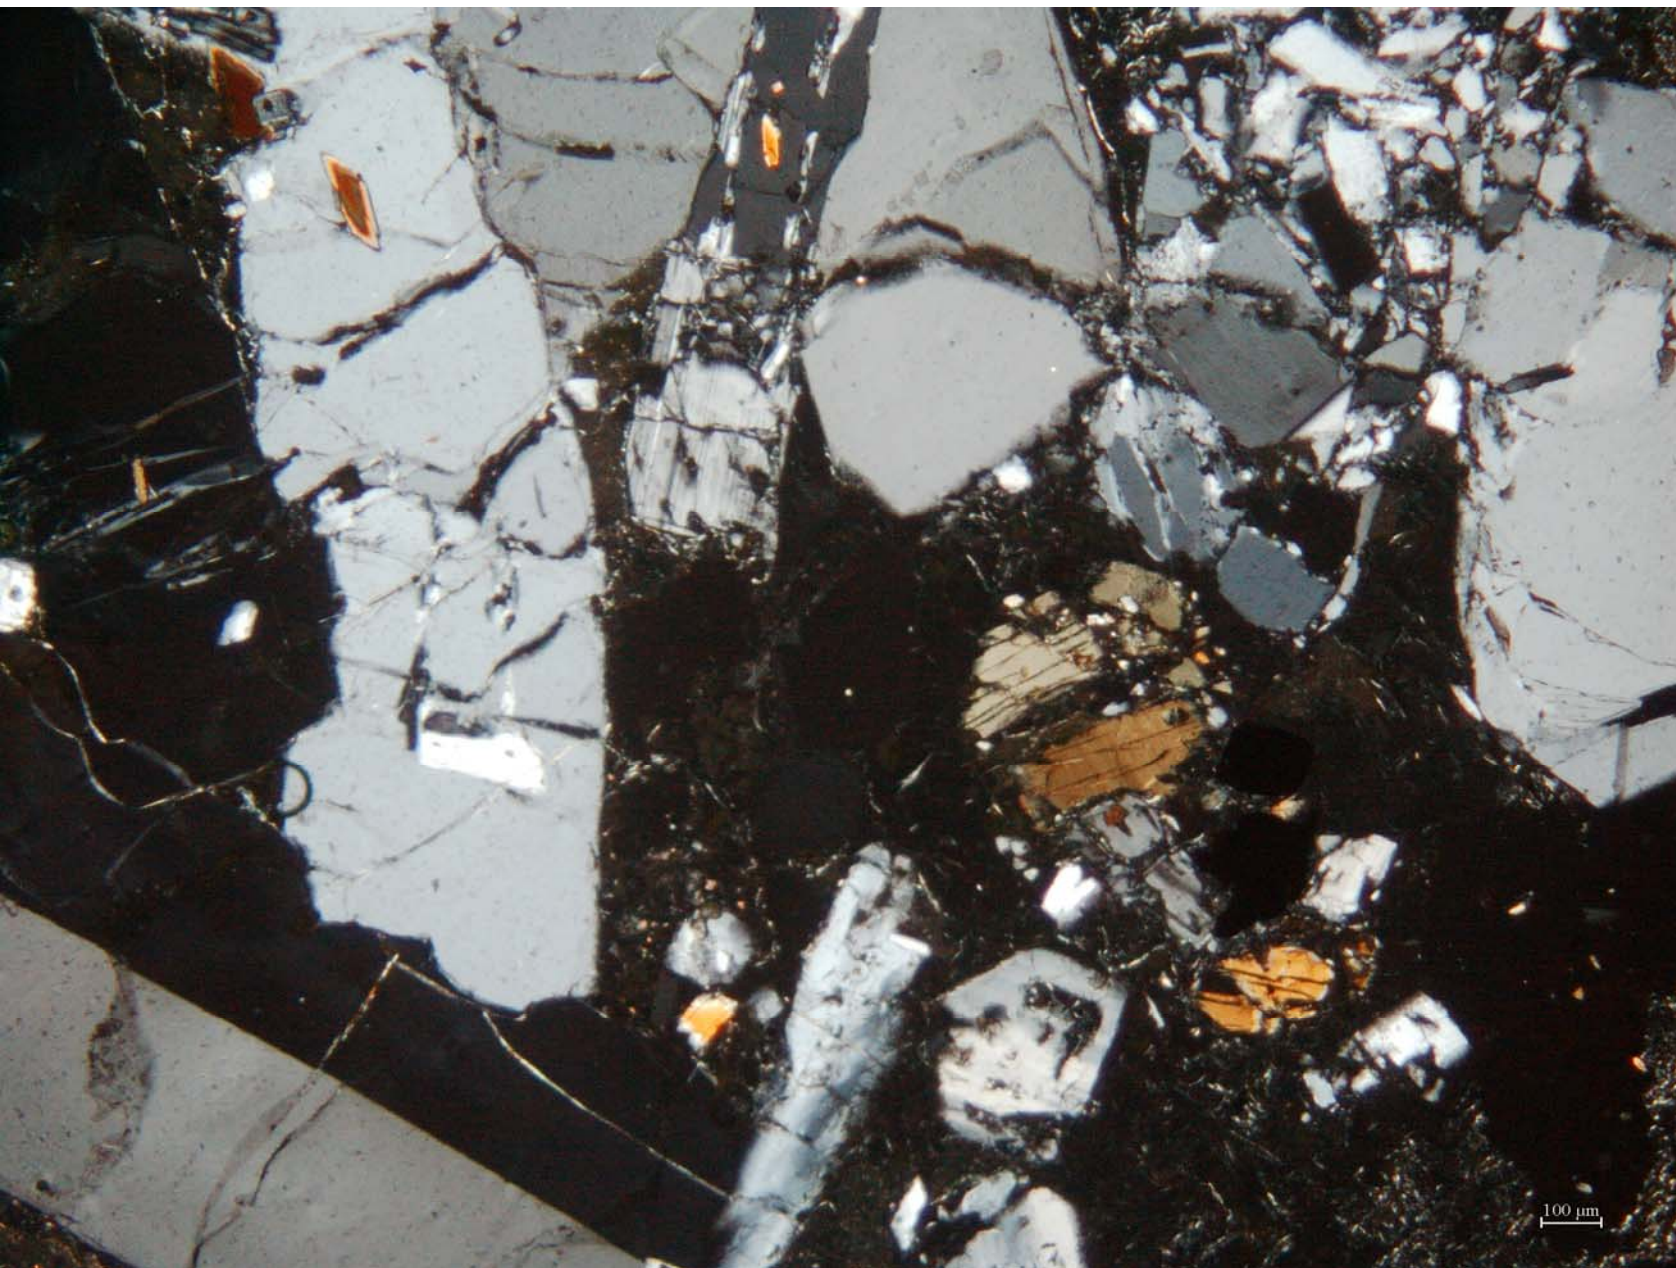

MEGT0322 – c6\_1

cross polarized light



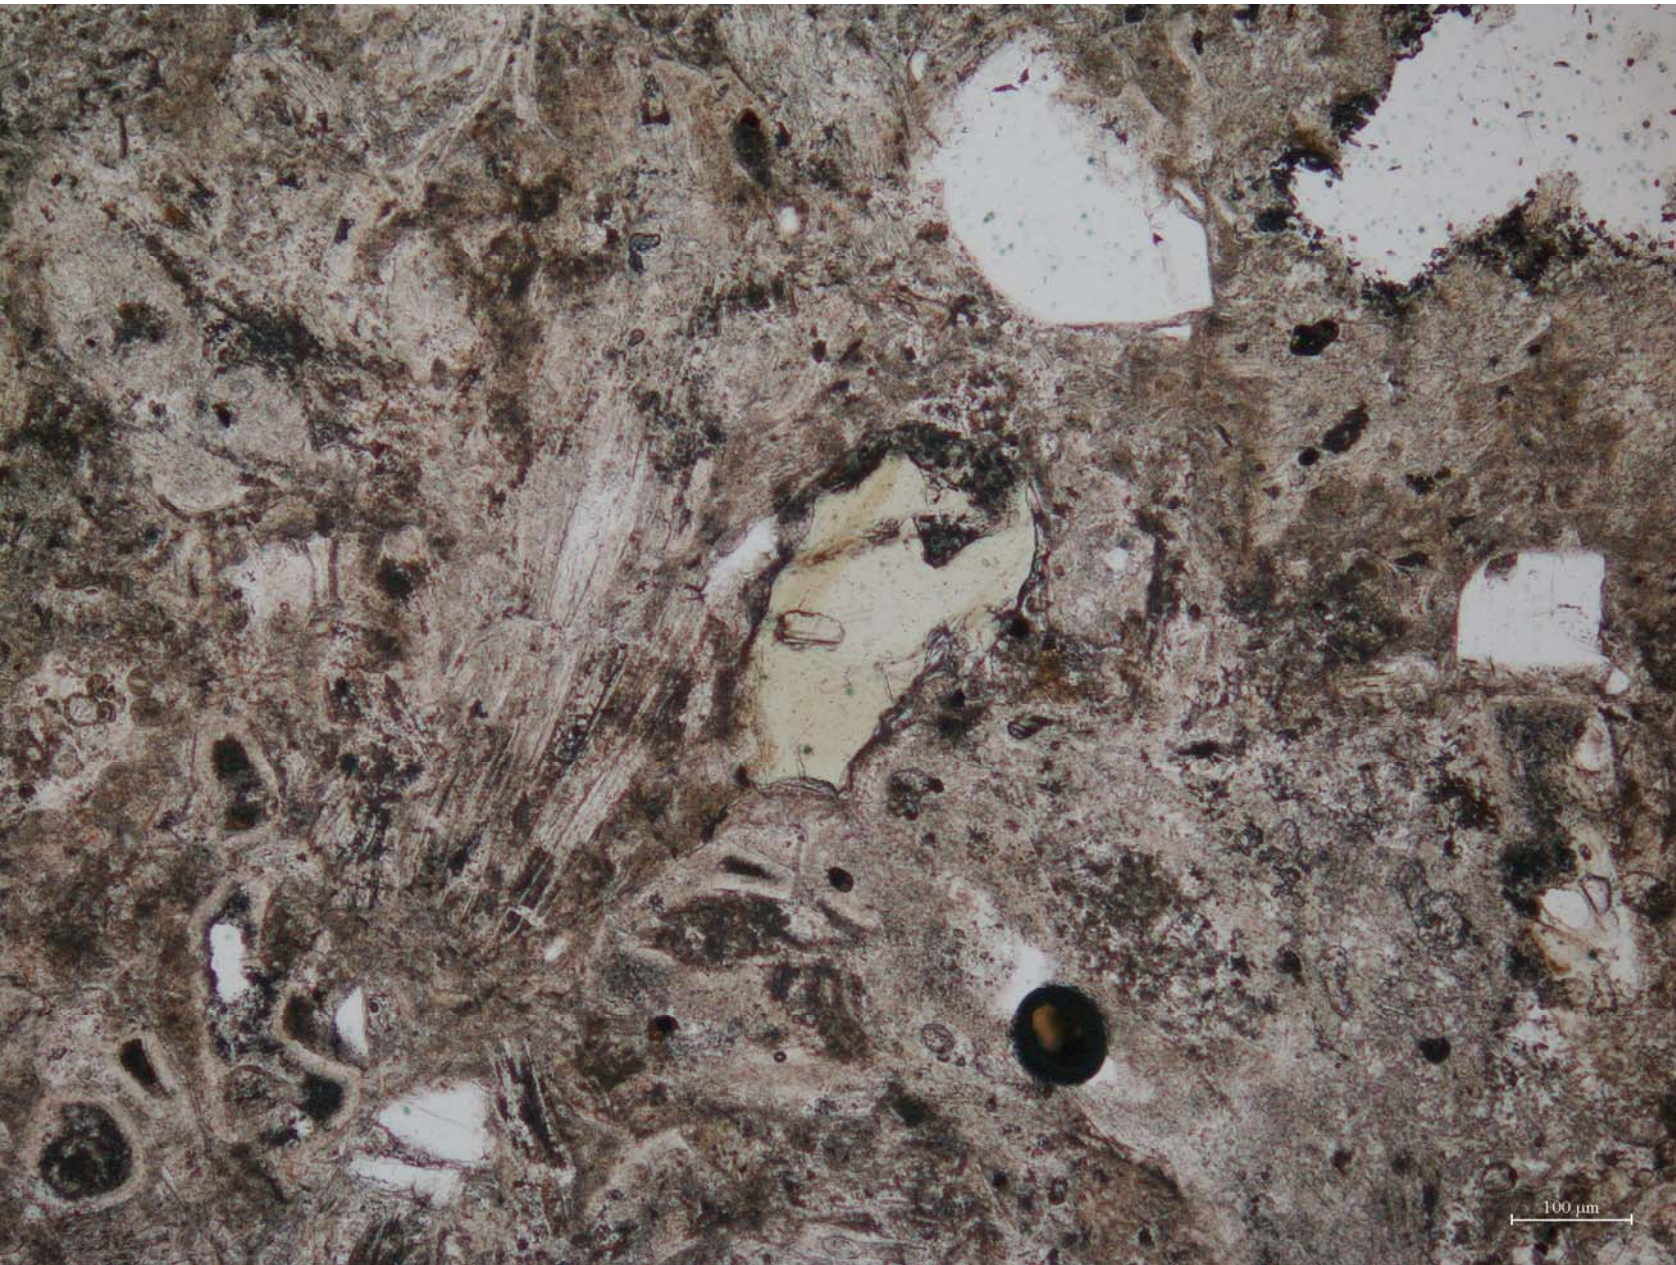

MEGT0322 - c7\_1

plane polarized light



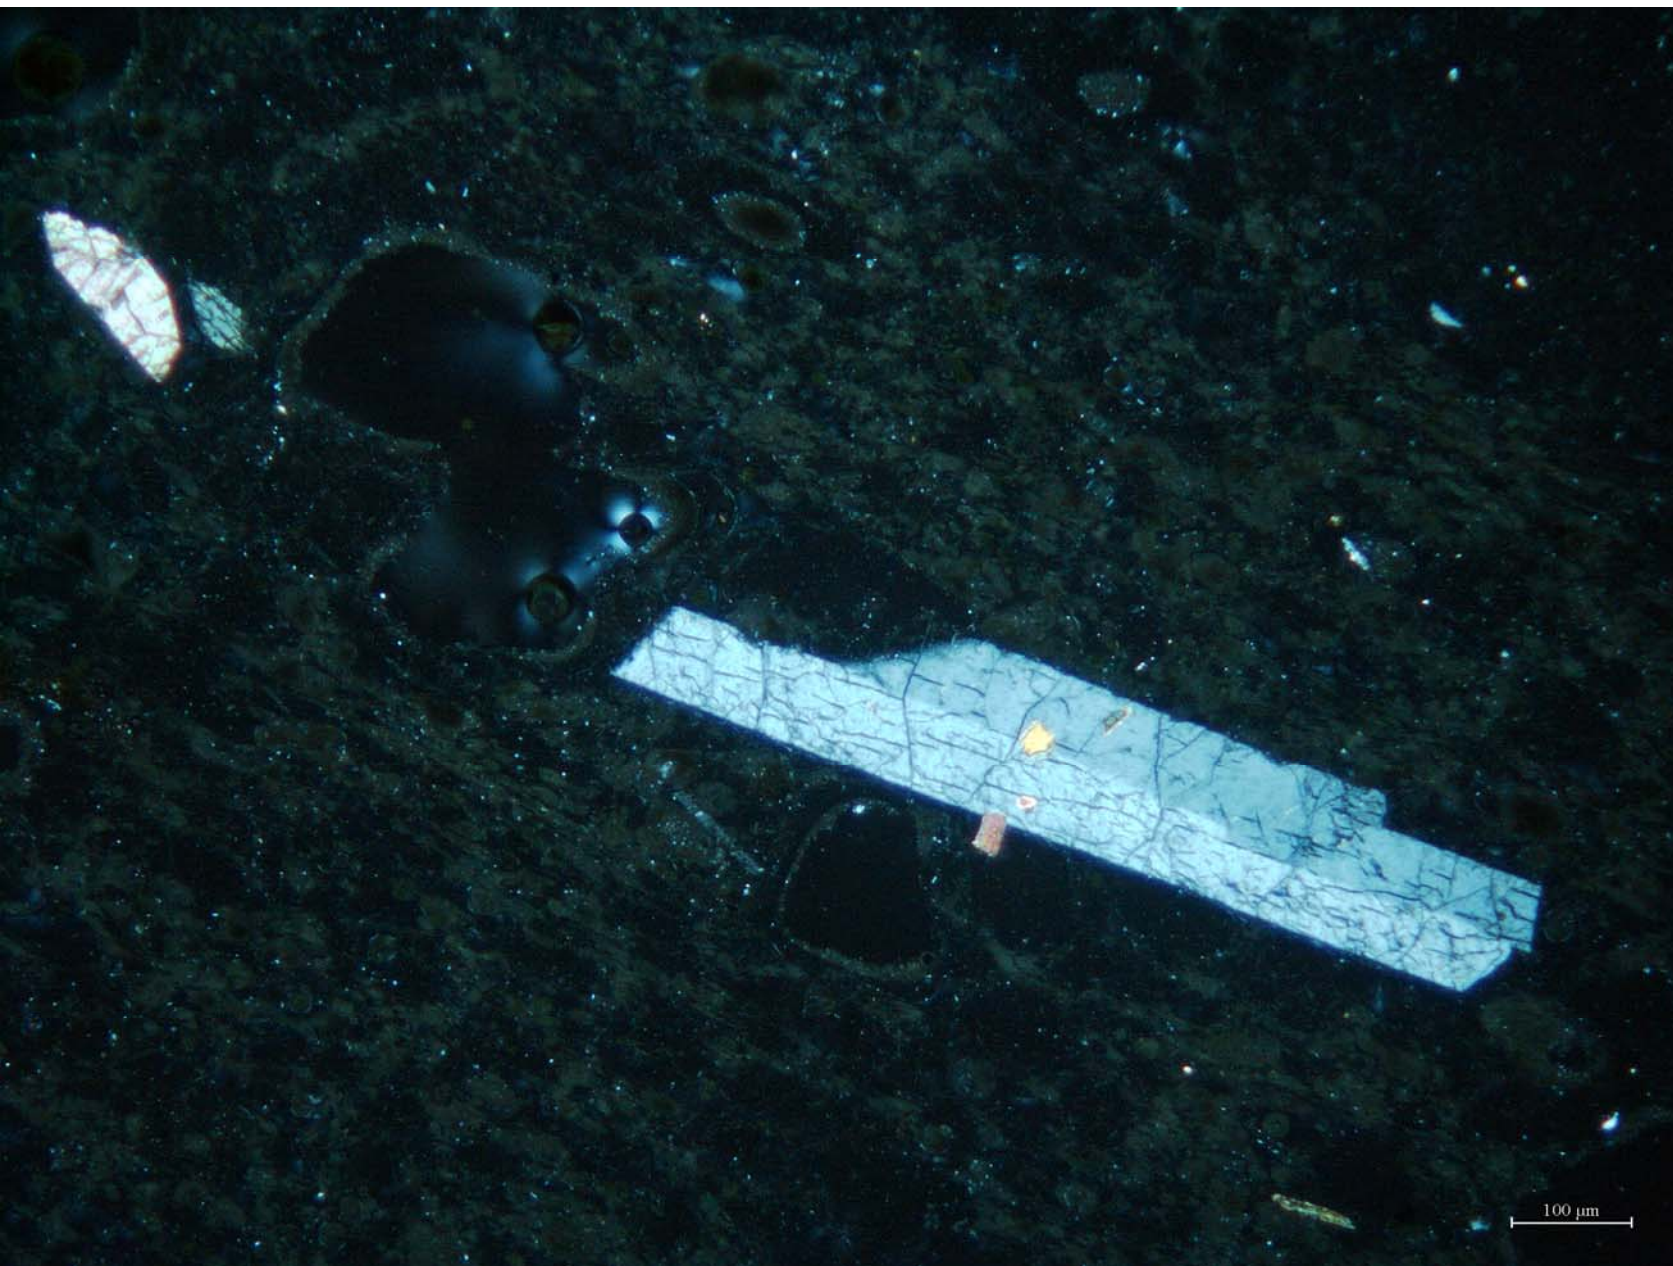

OIS0321 – c1\_1

cross polarized light



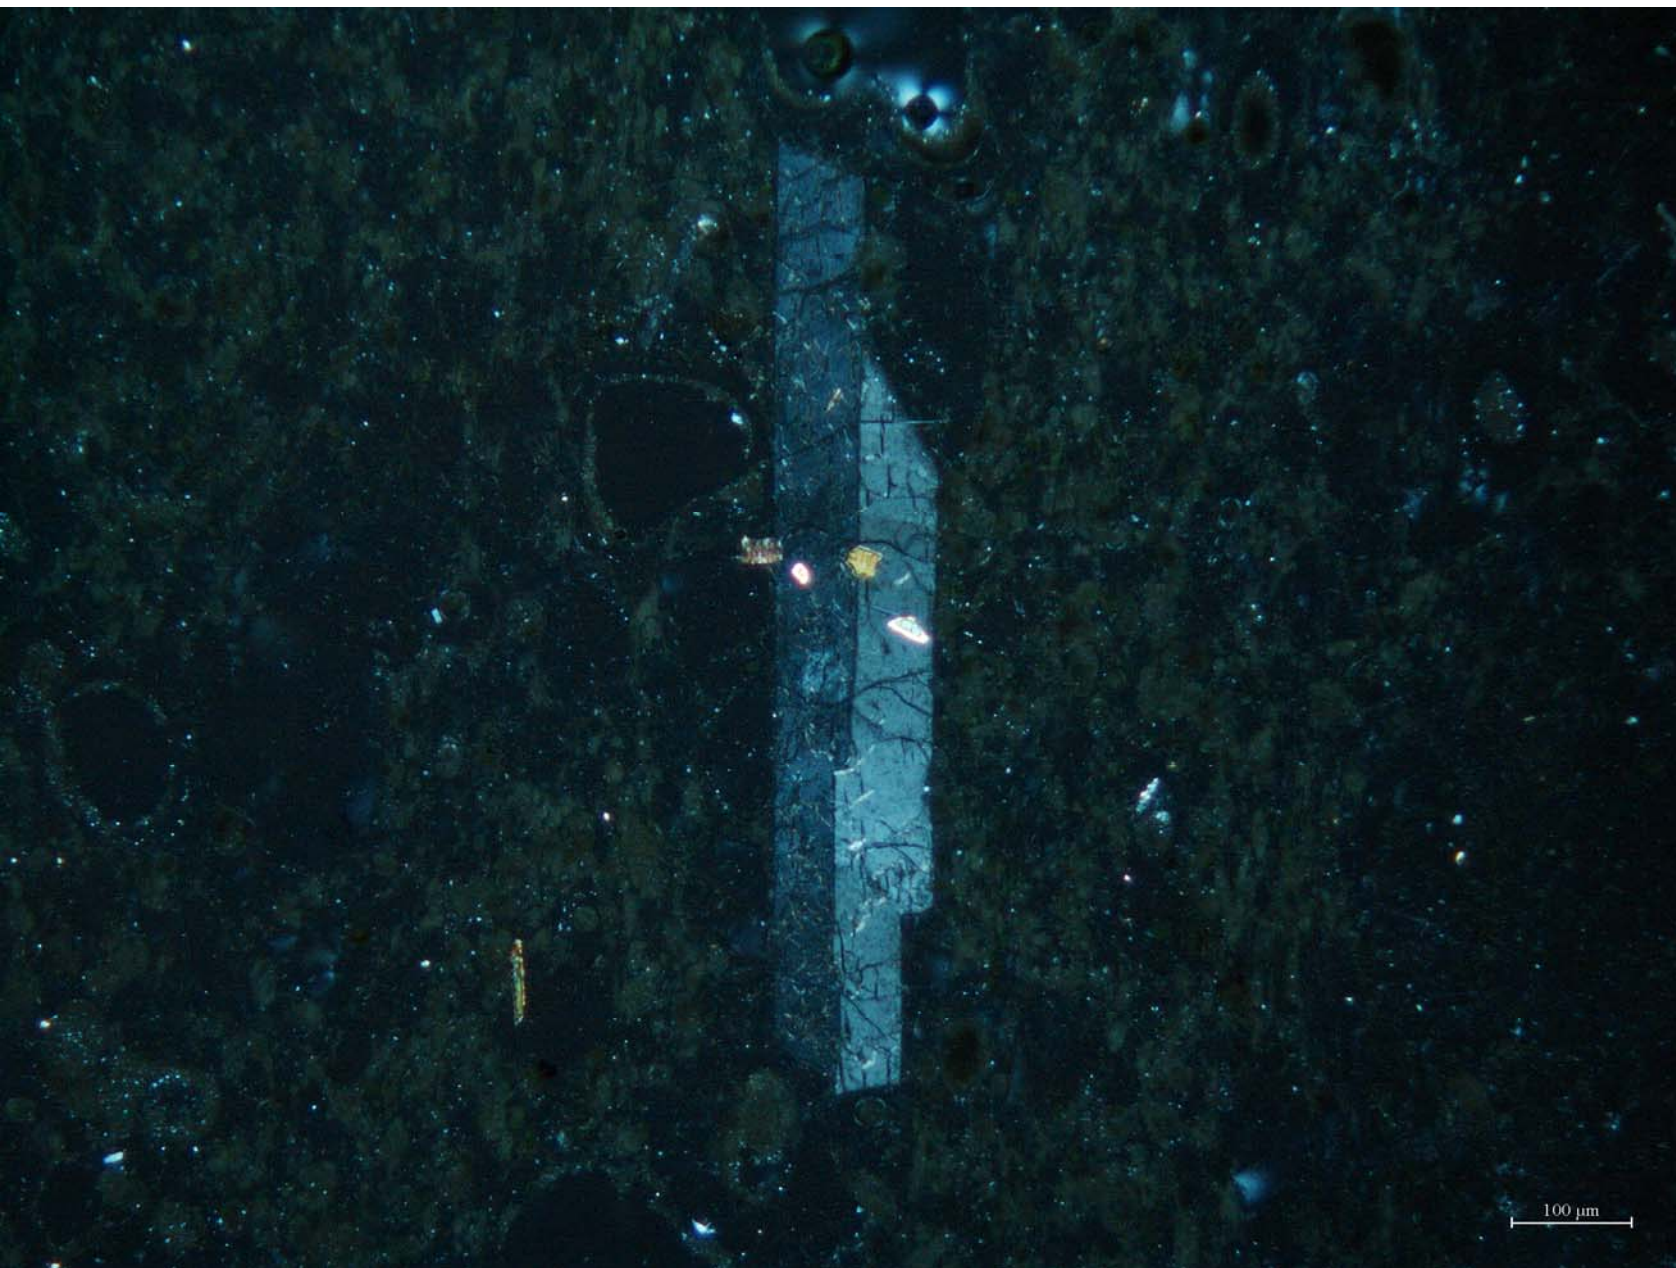

OIS0321 – c1\_2

cross polarized light



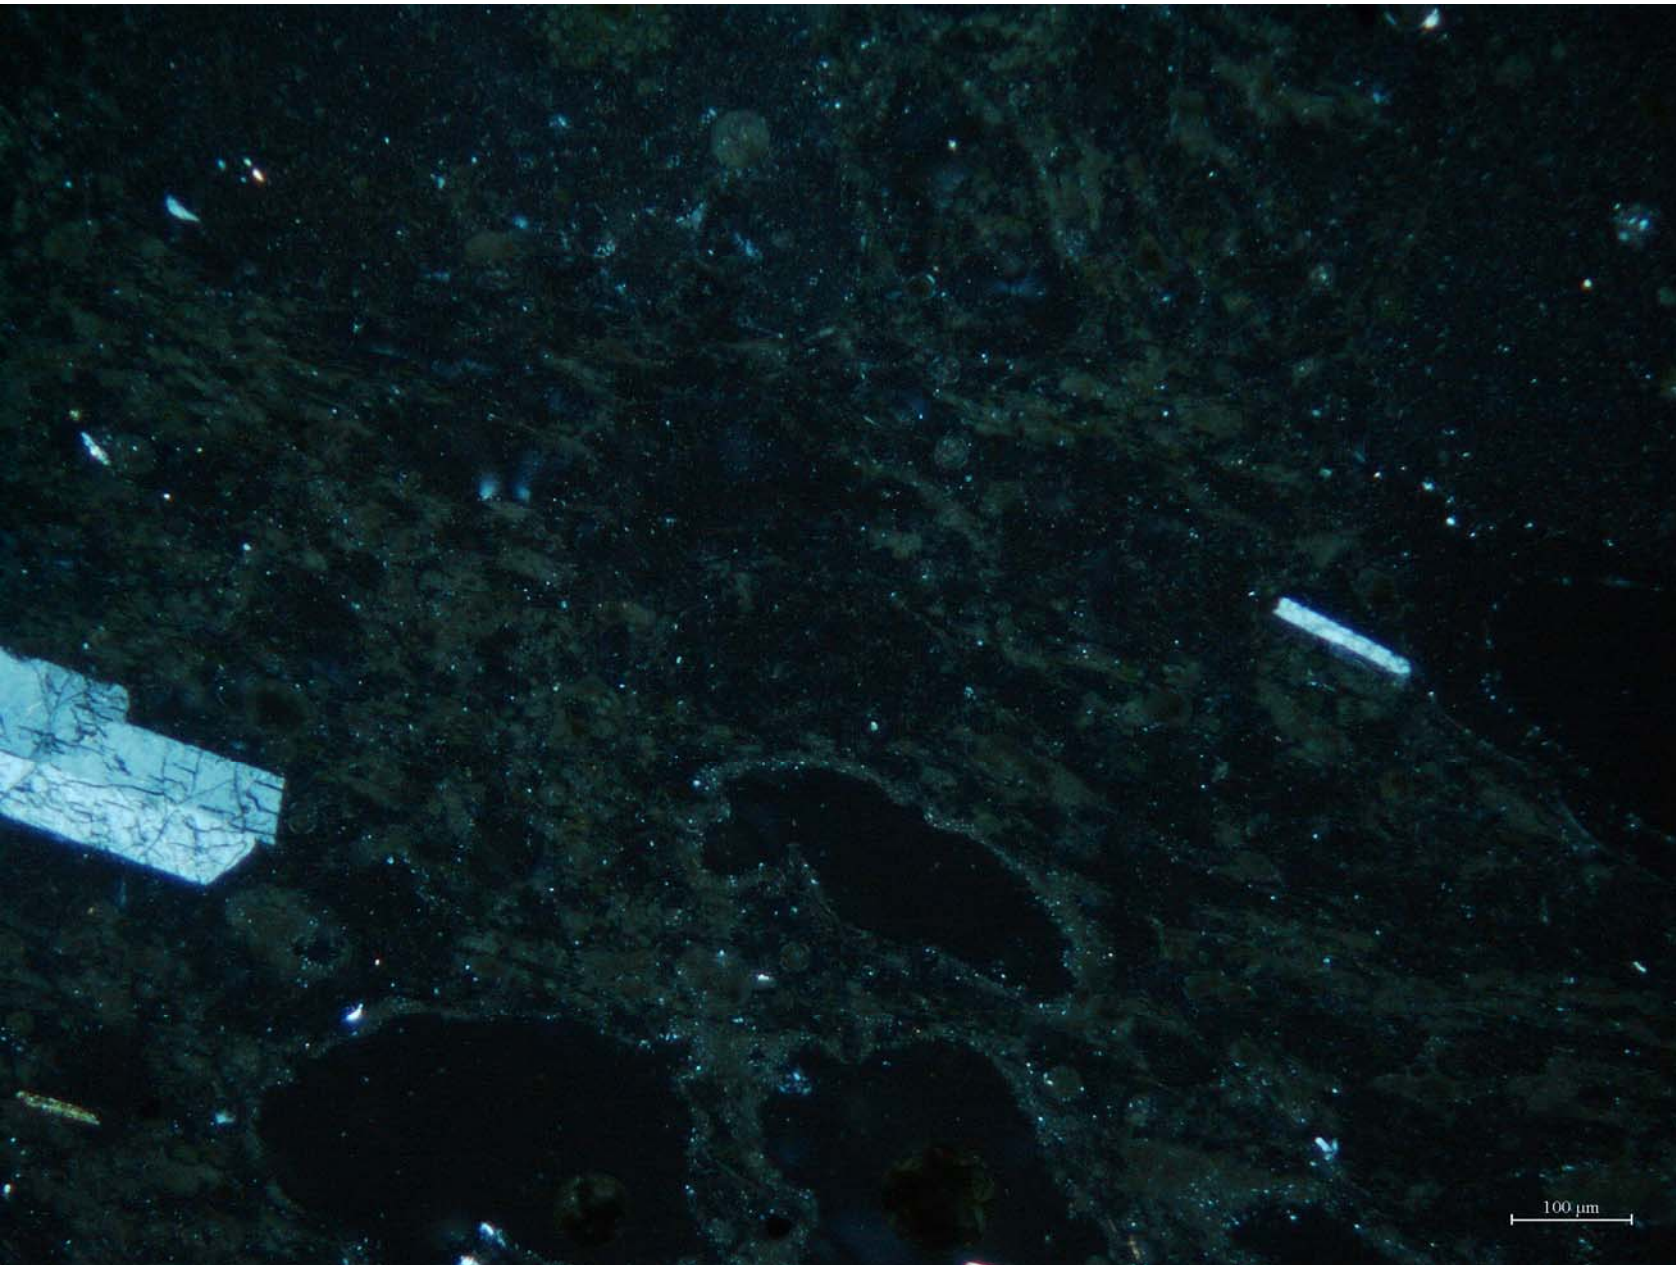

OIS0321 – c1\_3

cross polarized light



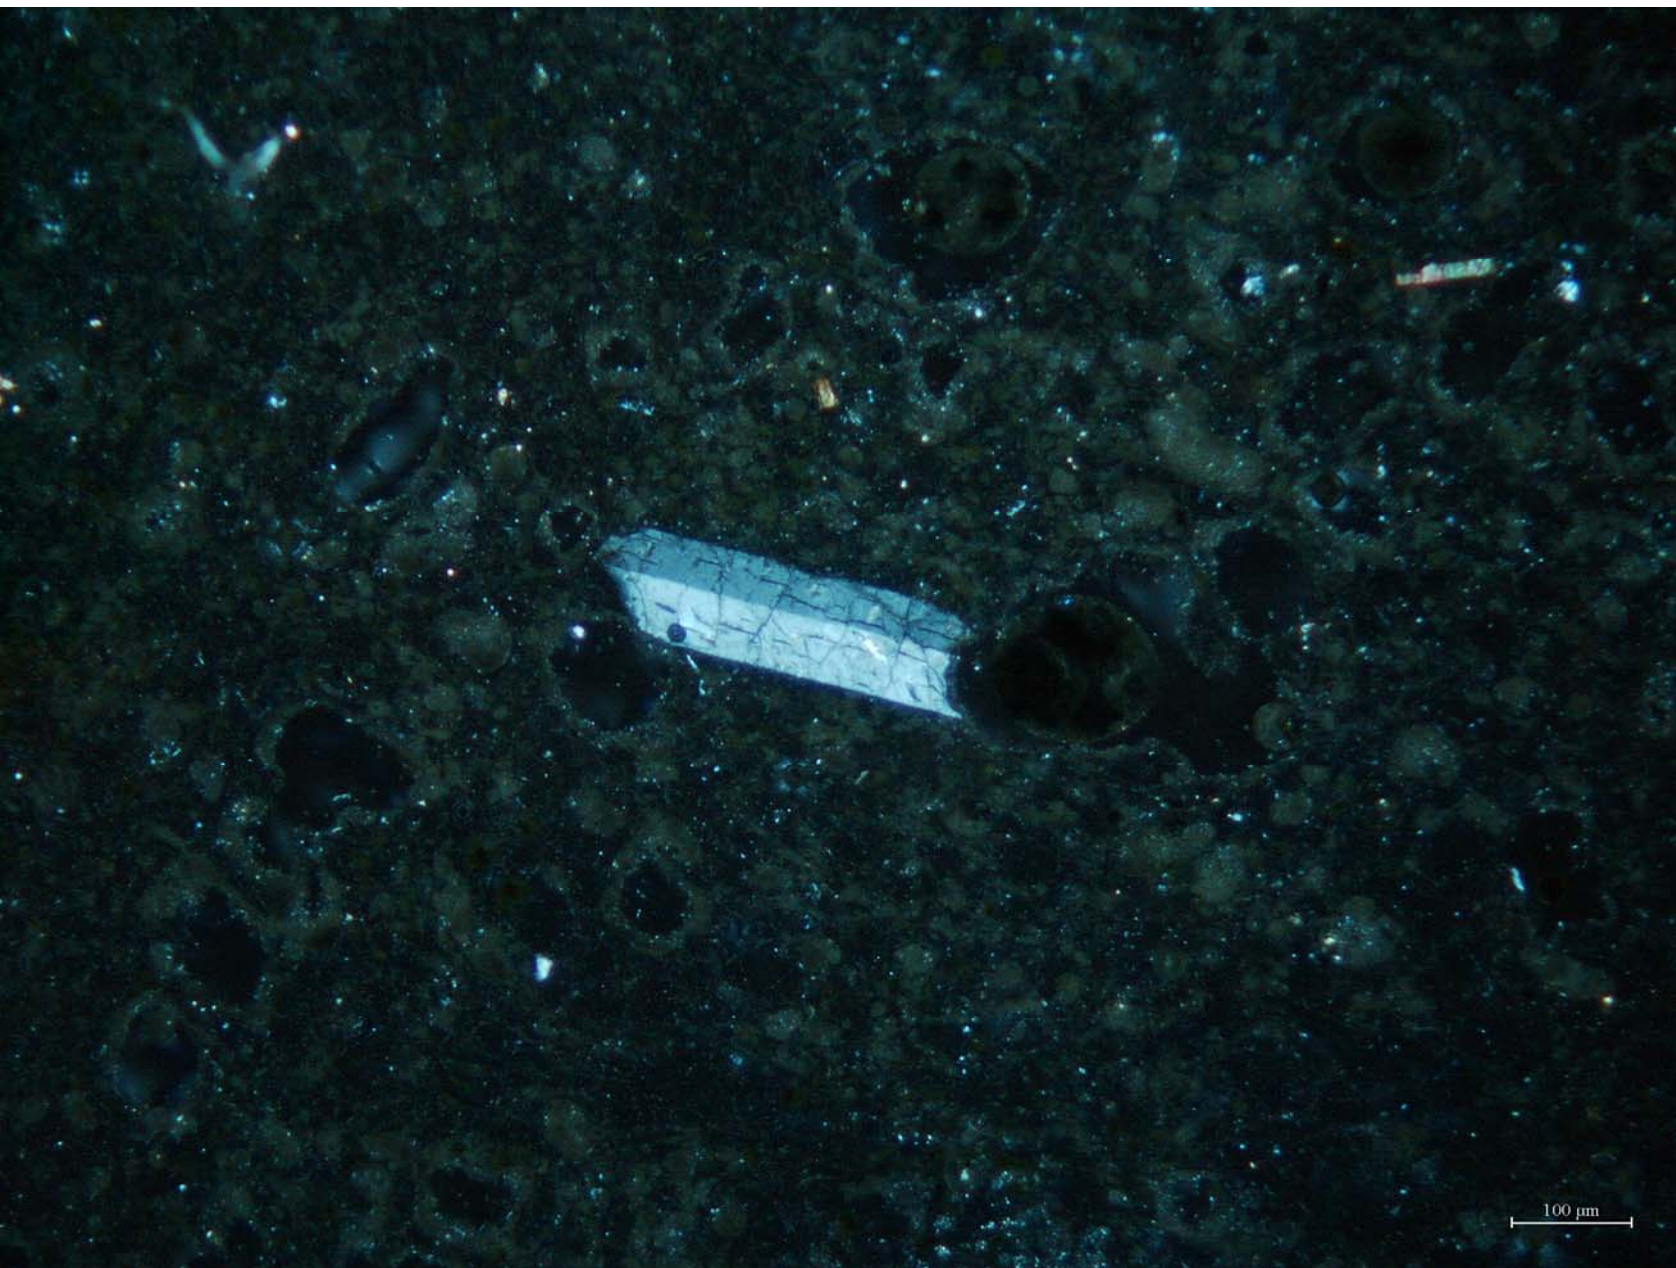

OIS0321 – c2\_1

cross polarized light



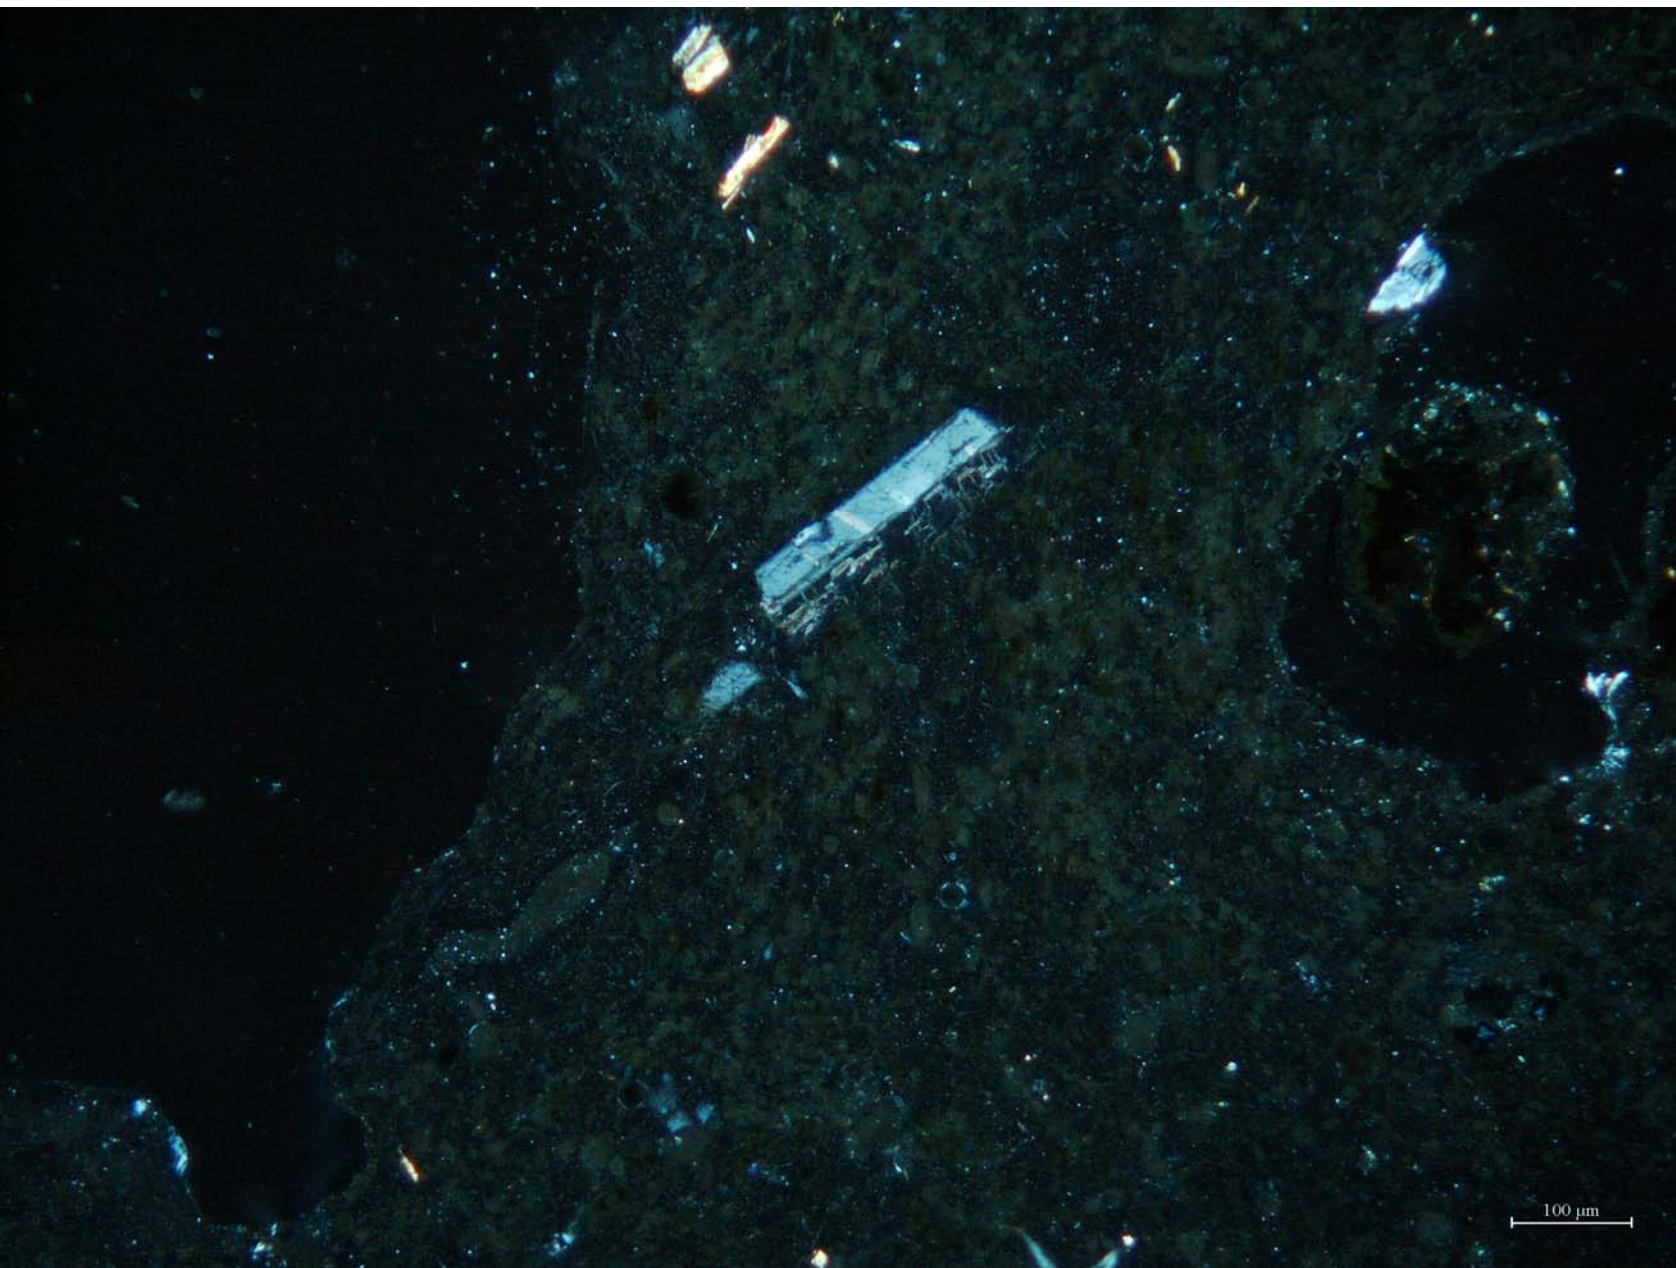

OIS0321 – c2\_2

cross polarized light



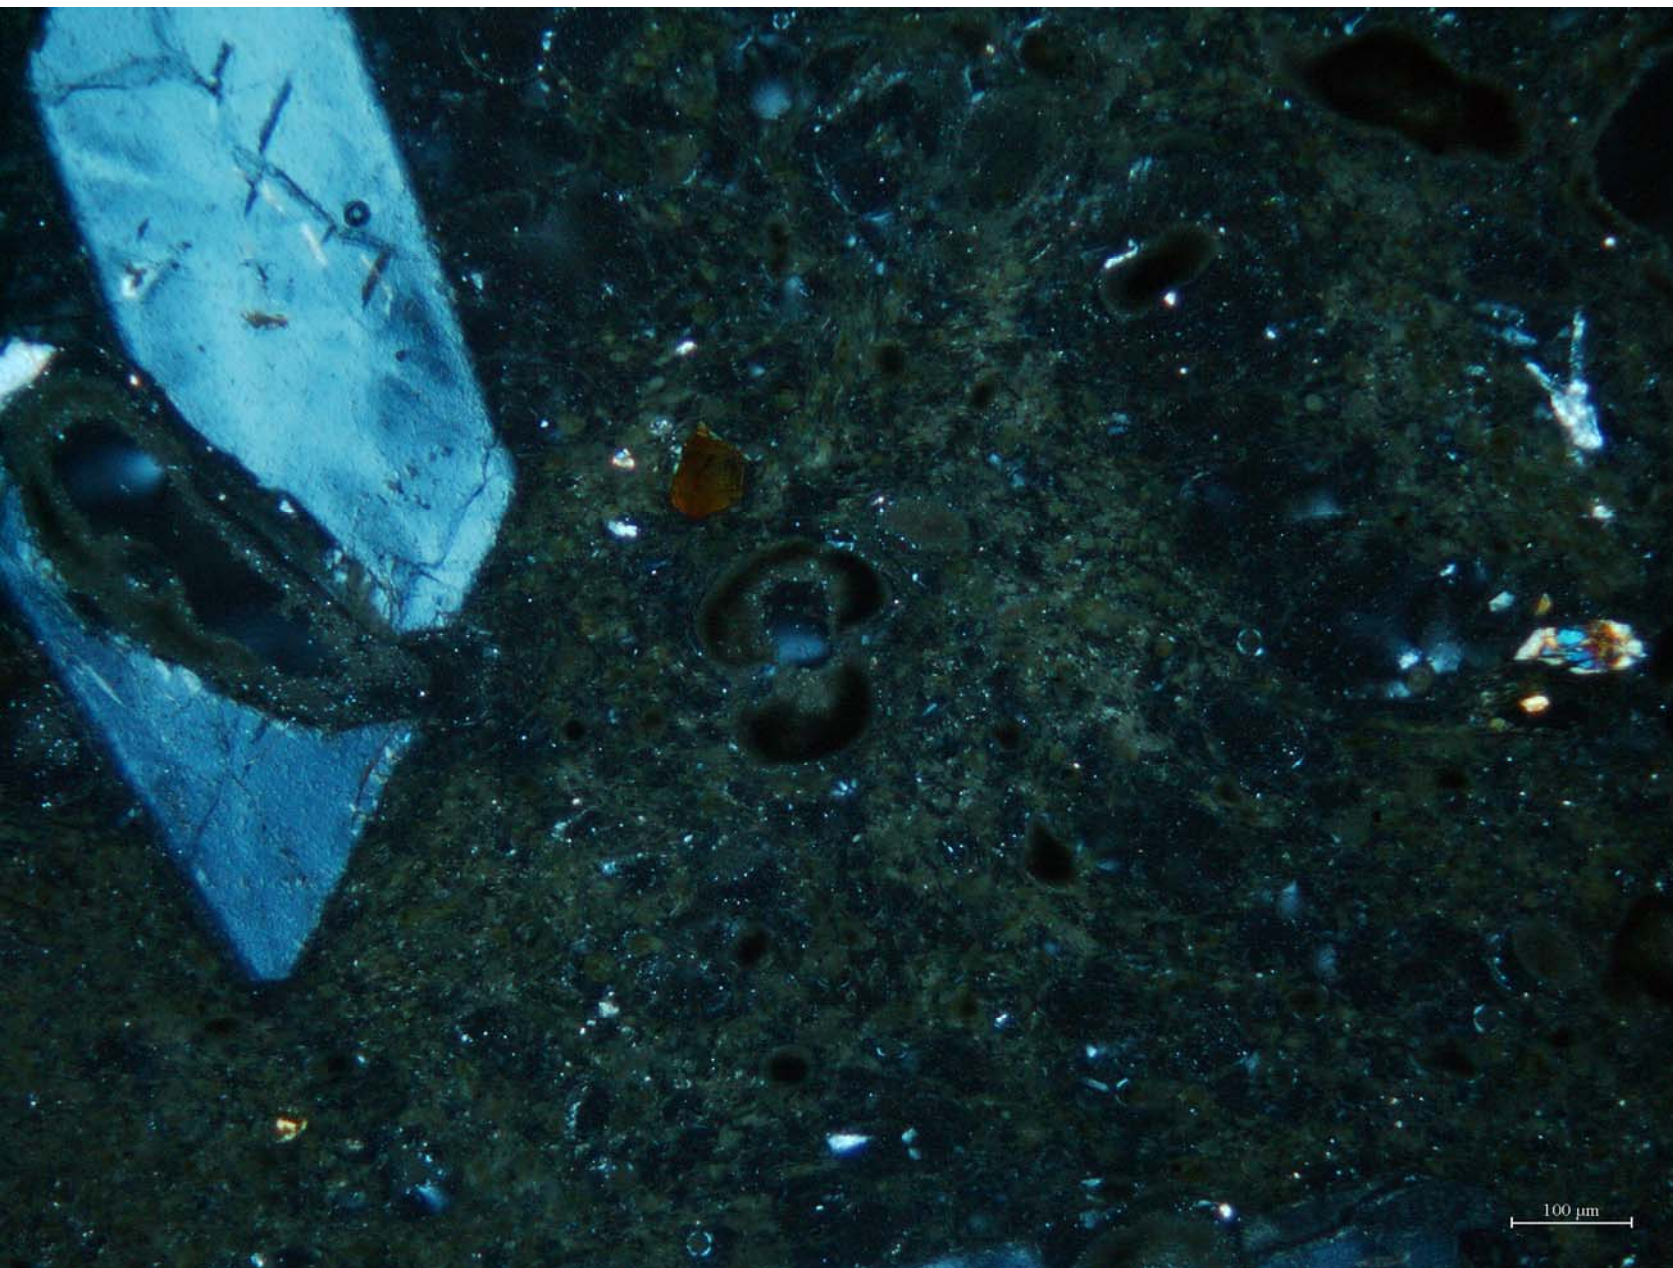

OIS0321 – c3\_1

cross polarized light



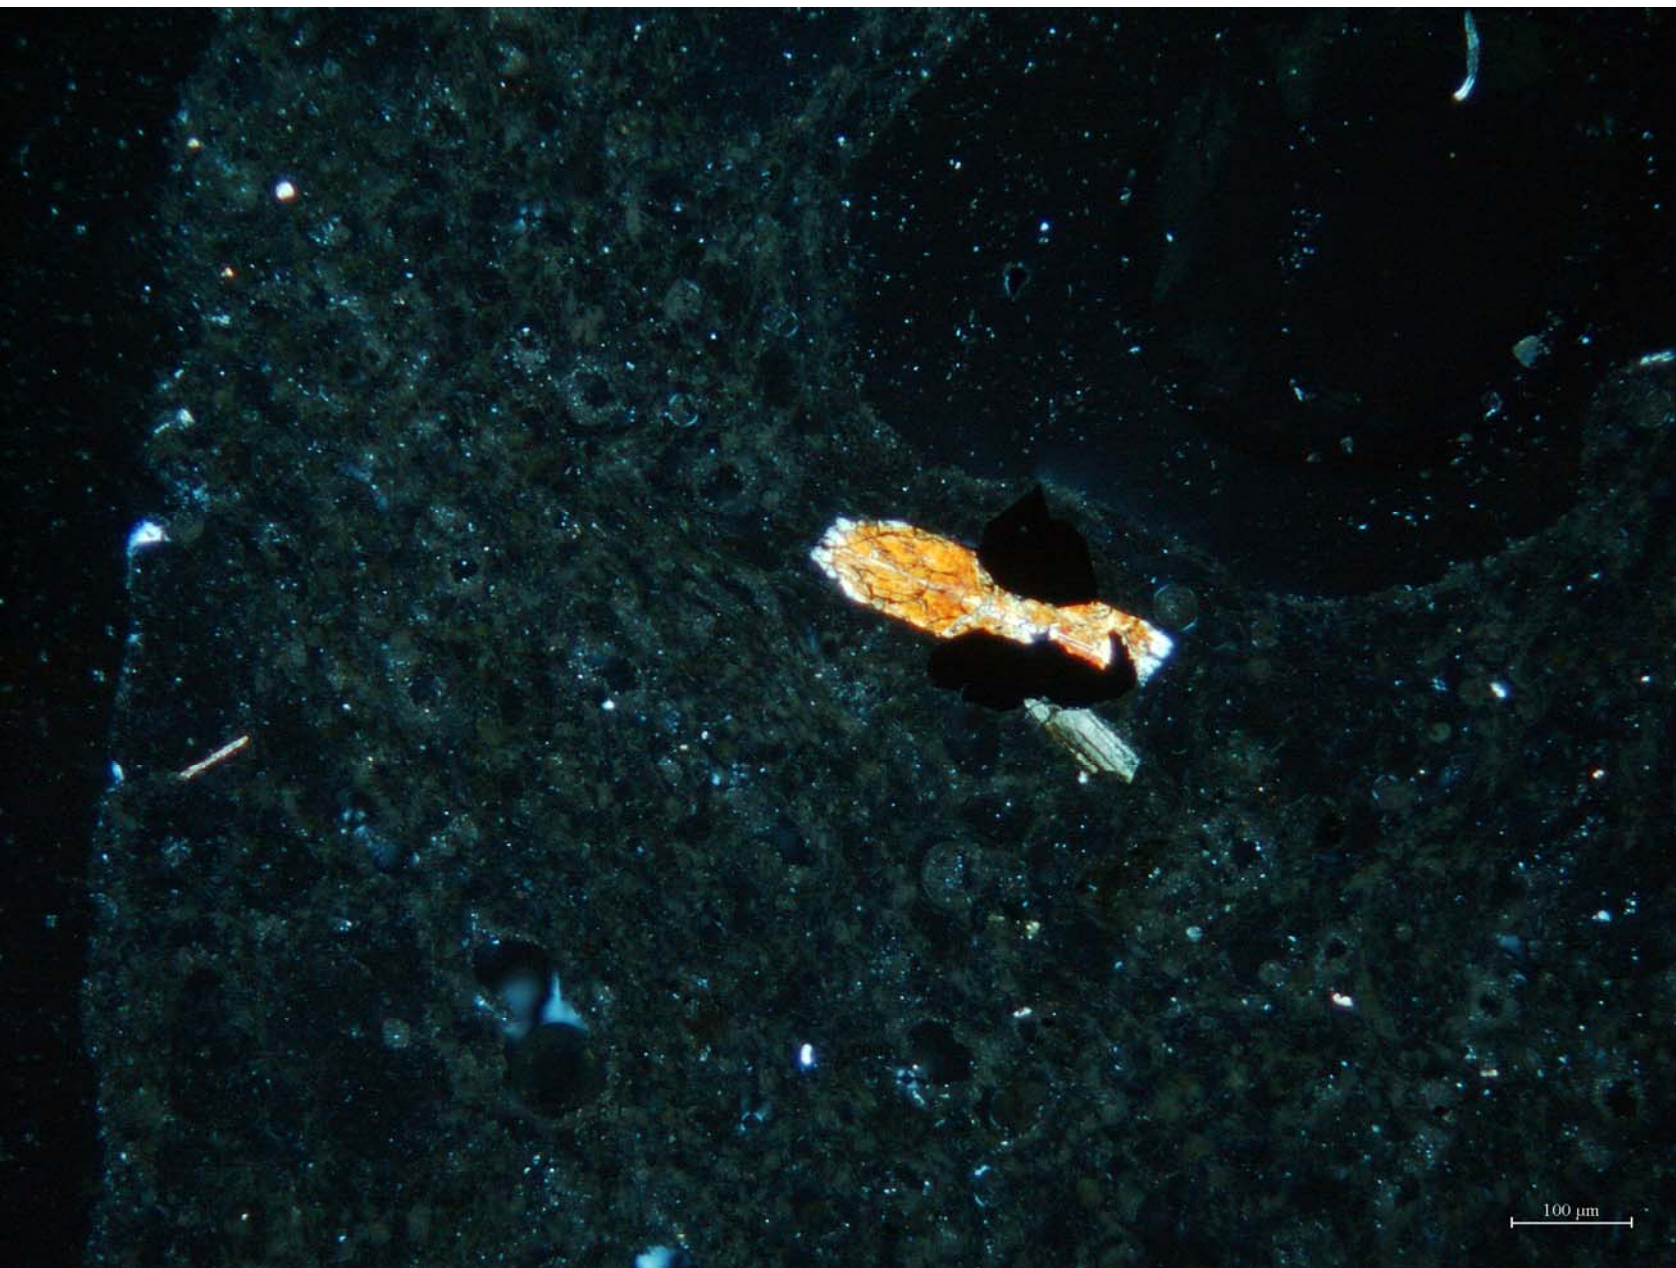

OIS0321 – c4\_1

cross polarized light



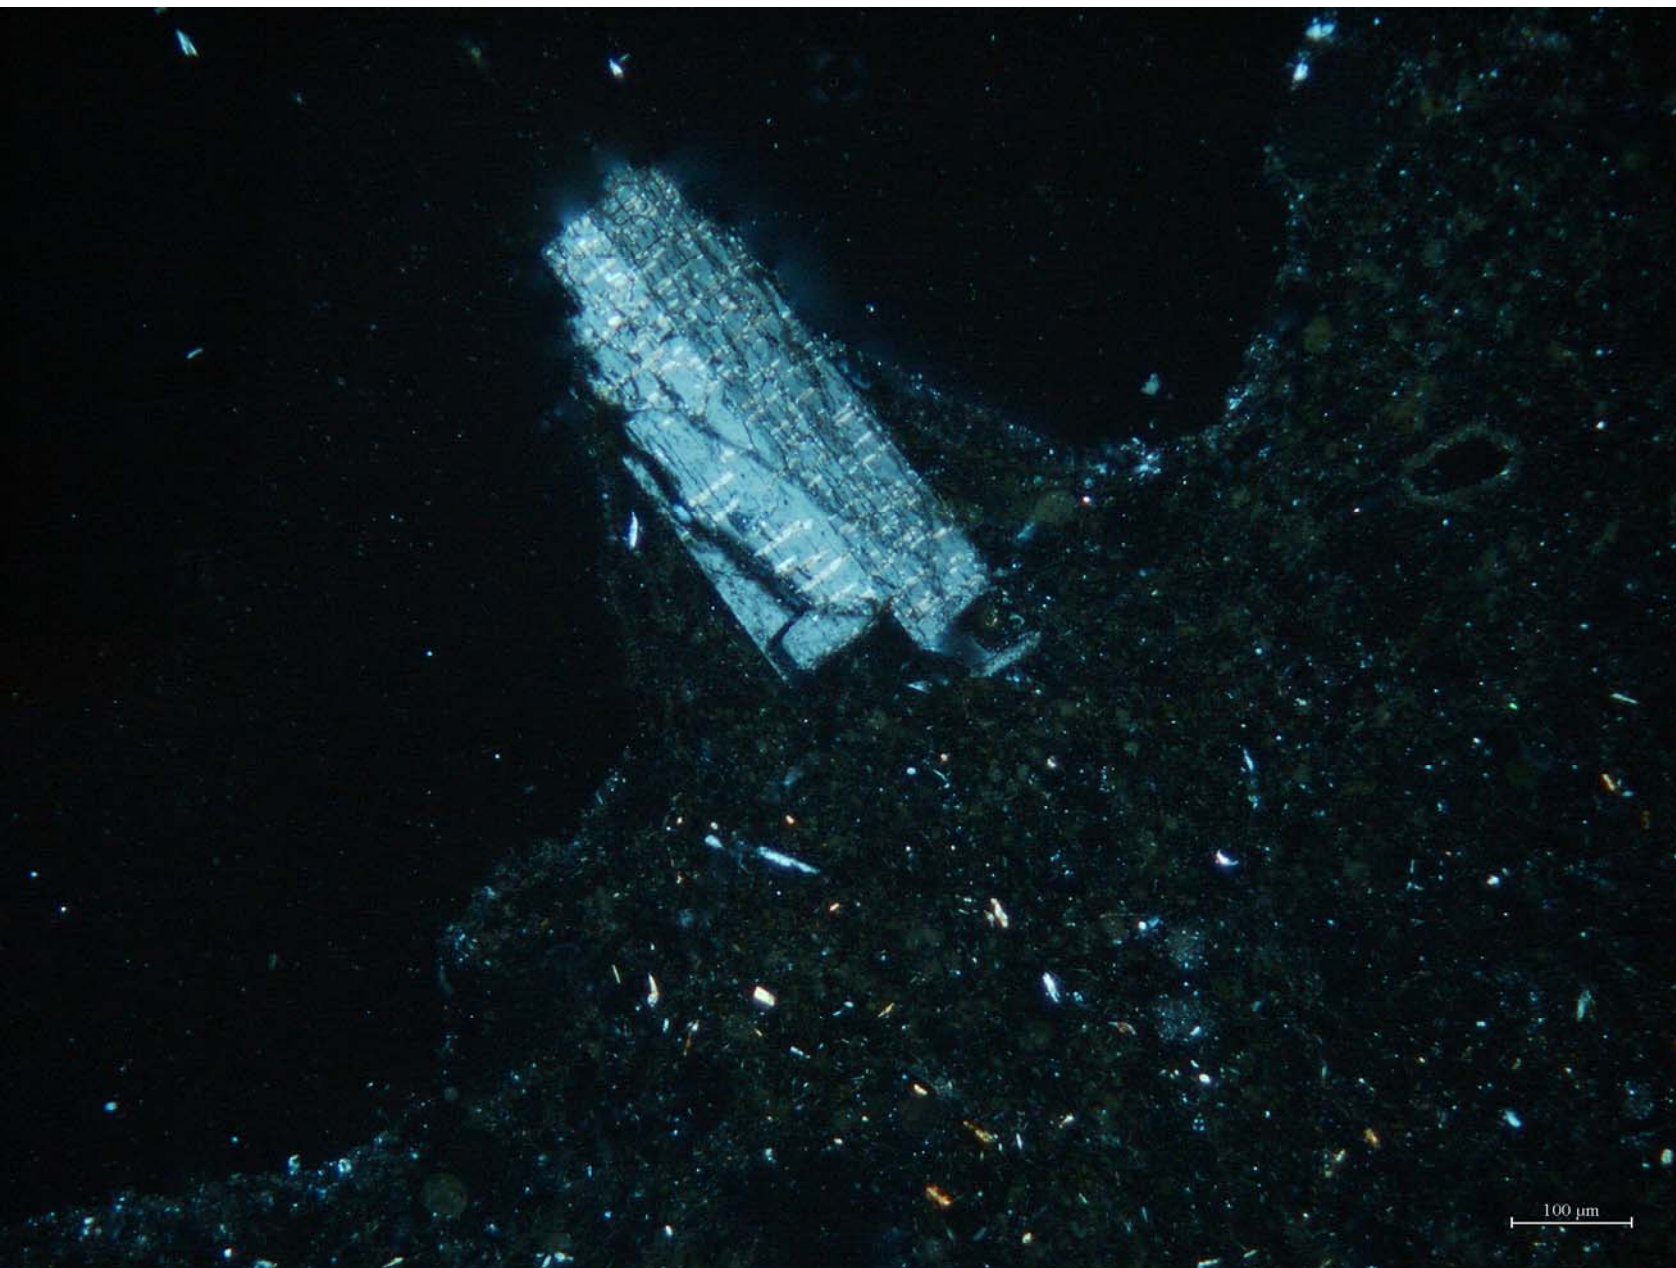

OIS0321 – c5\_1

cross polarized light



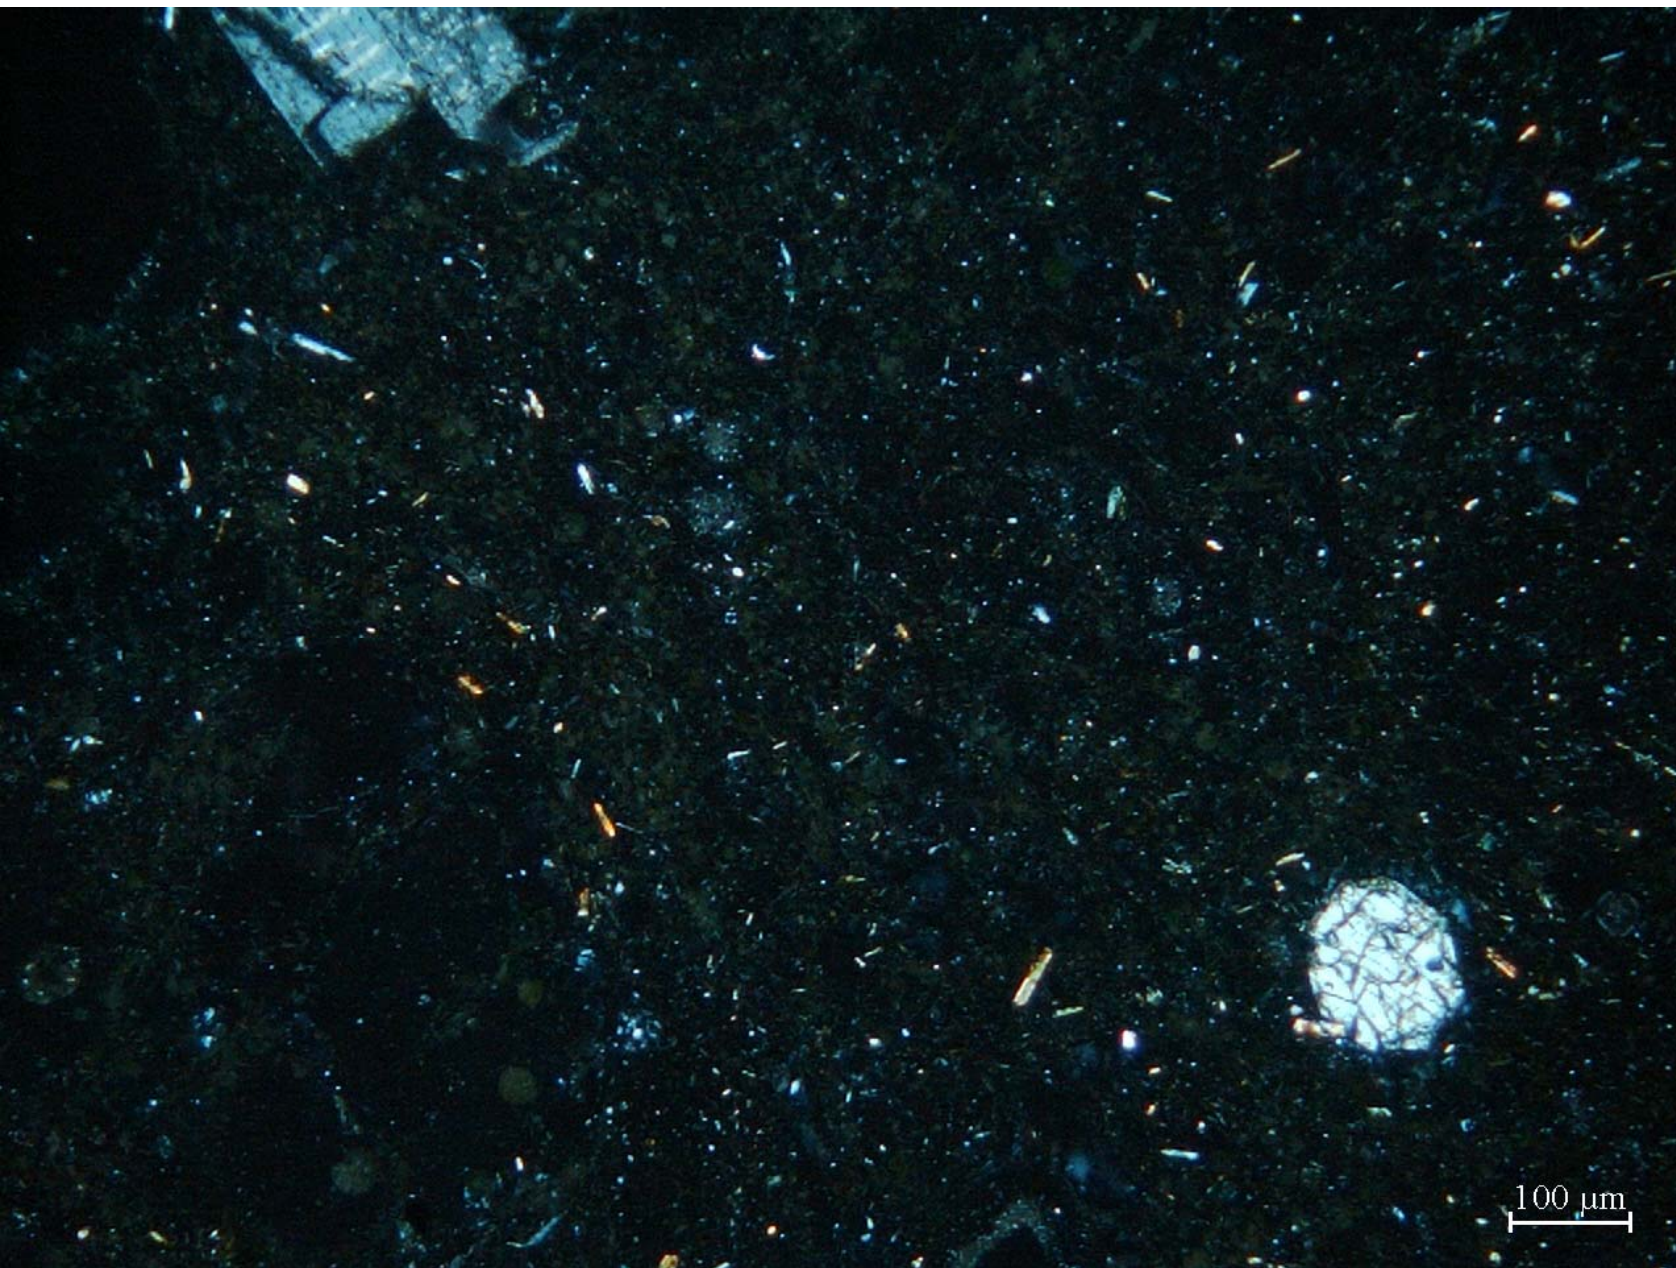

OIS0321 – c5\_2

cross polarized light



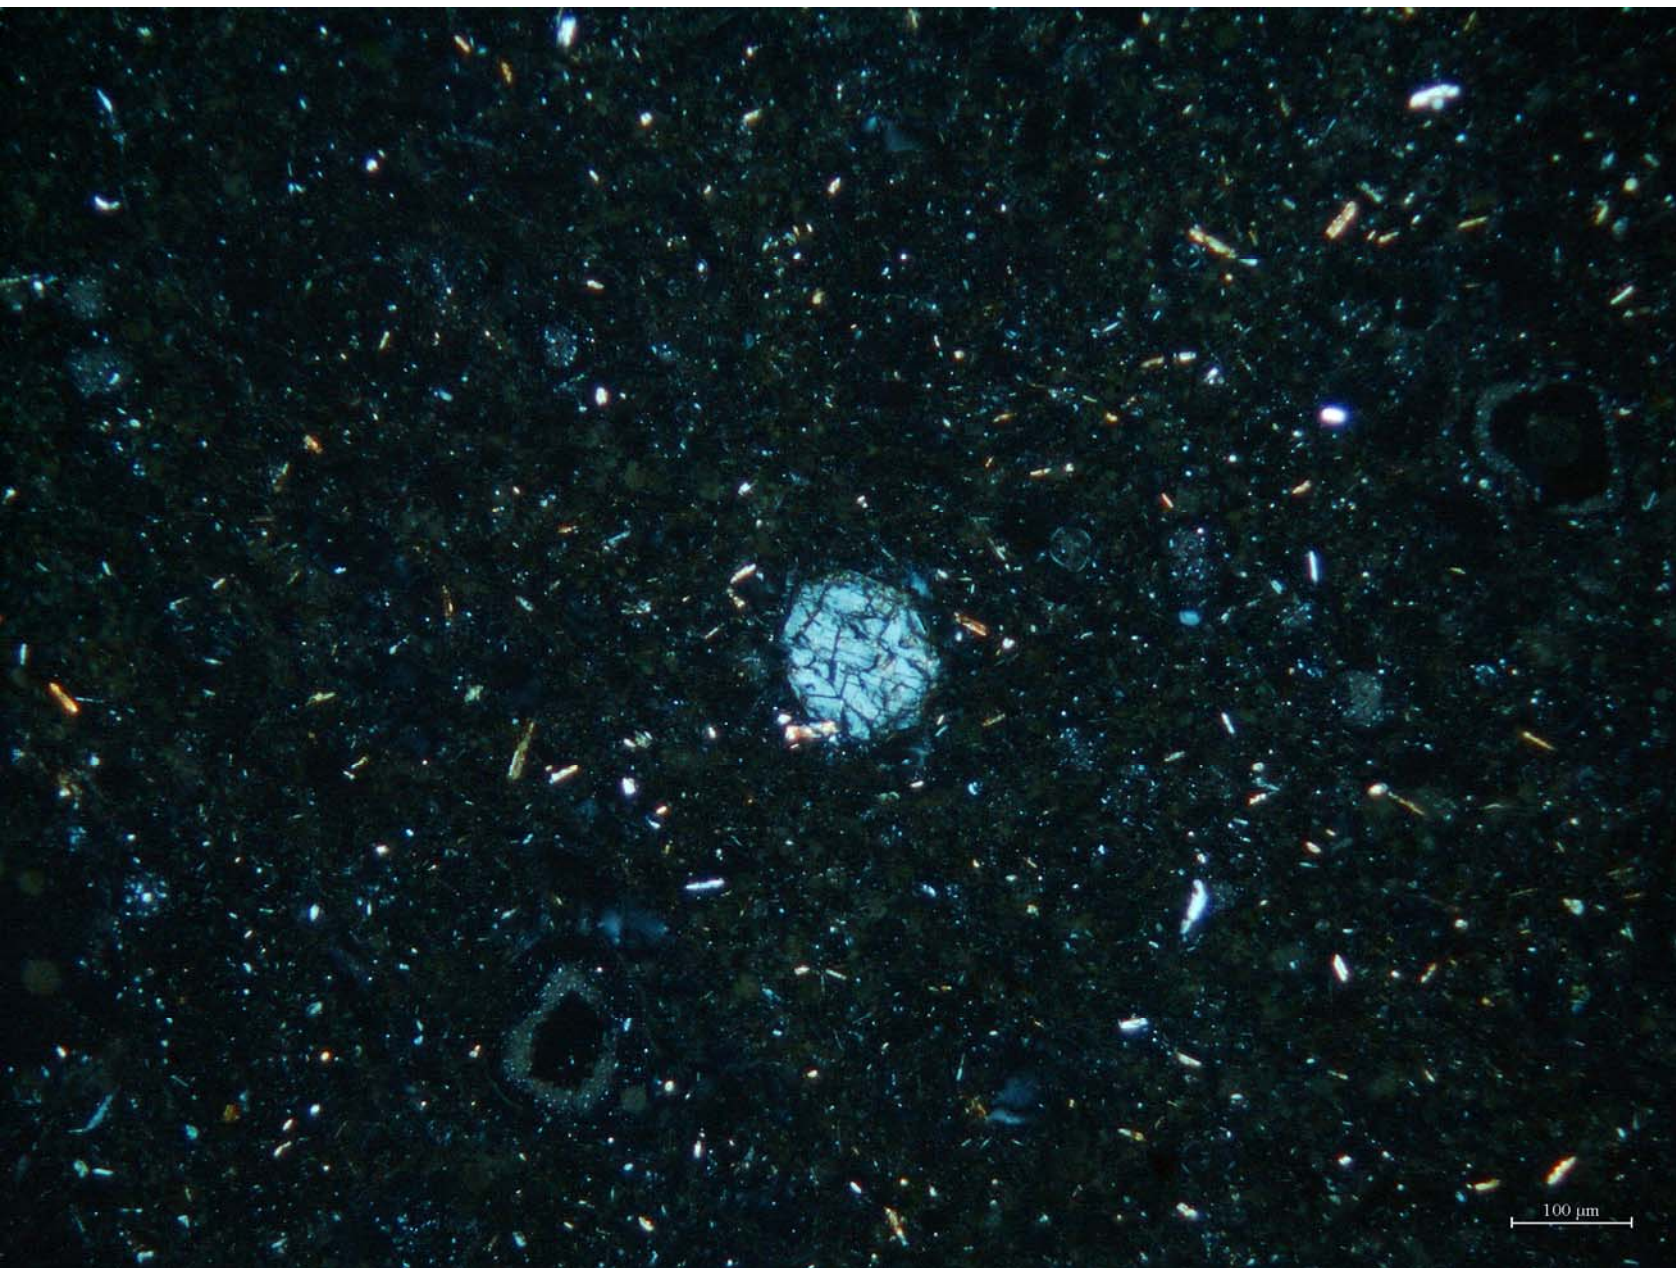

OIS0321 – c5\_3

cross polarized light



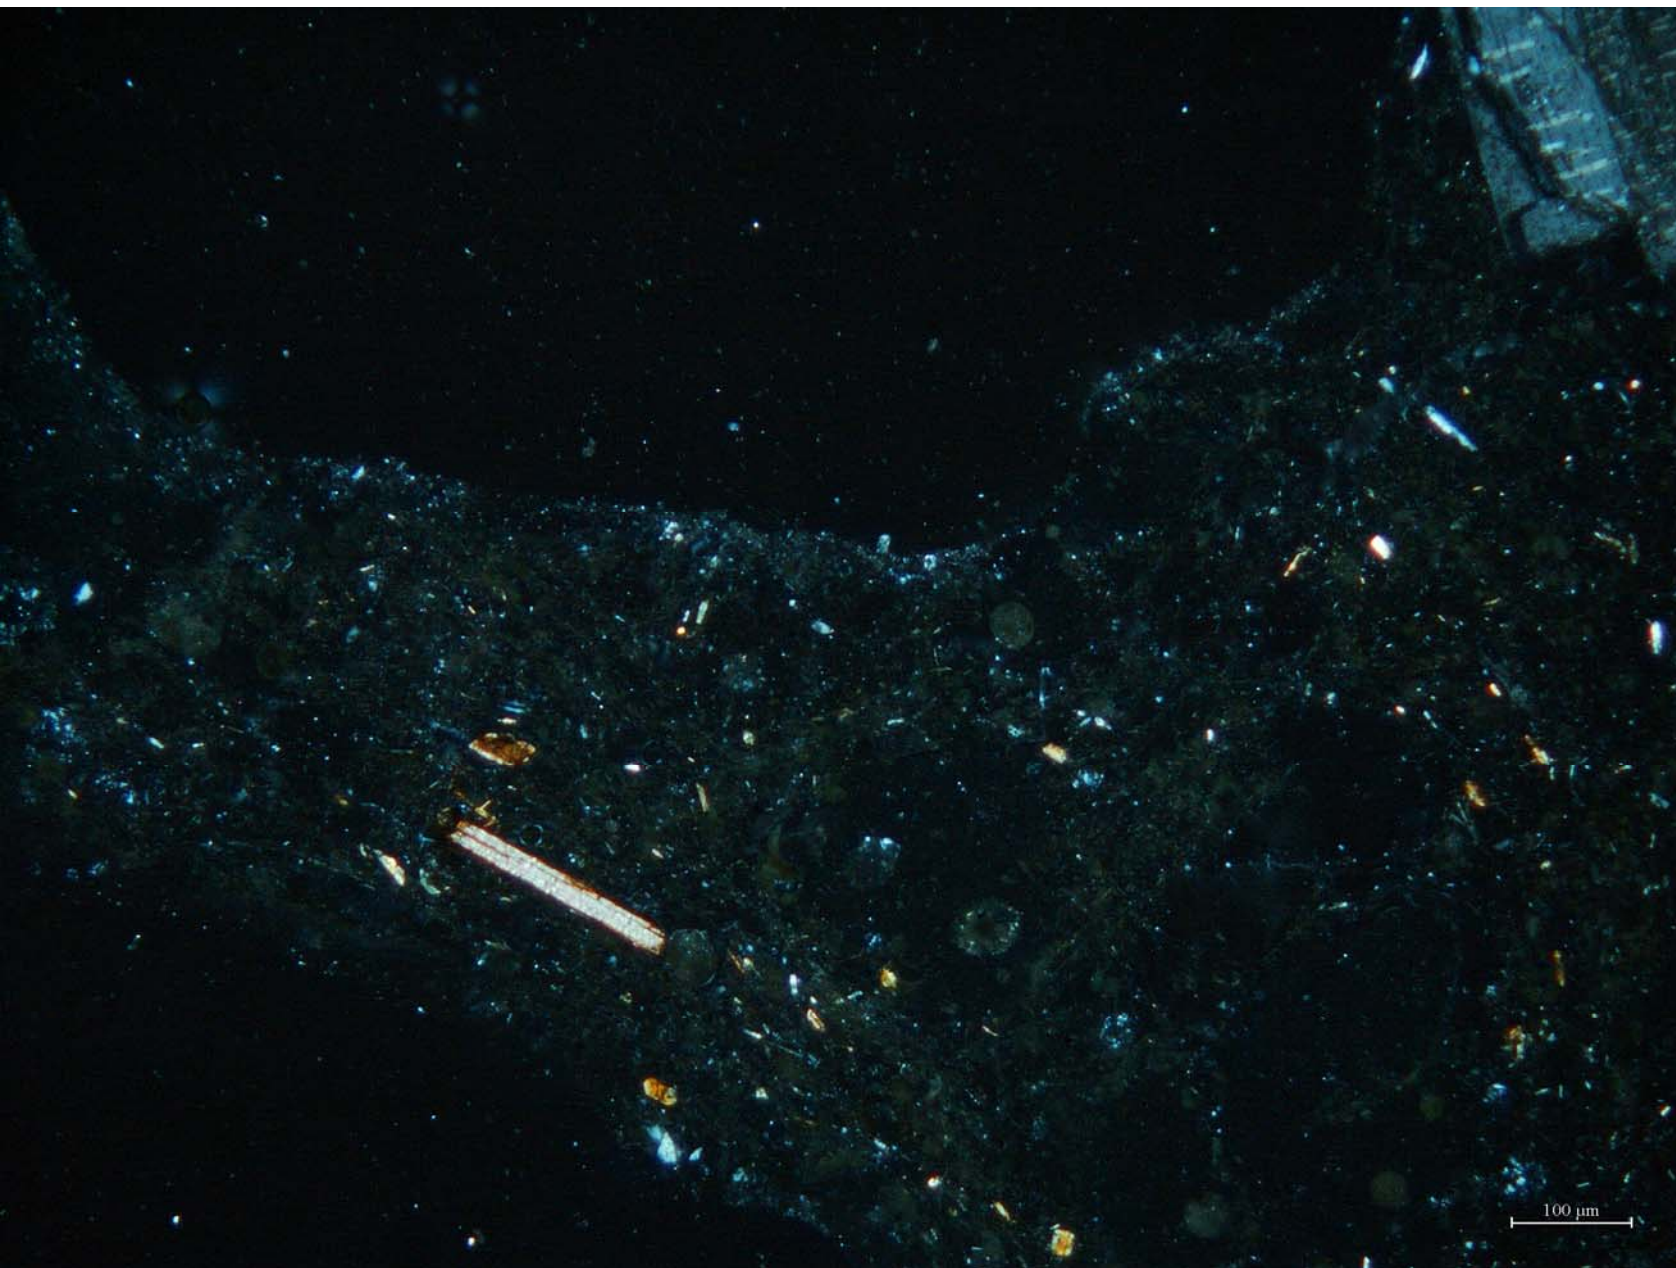

OIS0321 – c5\_4

cross polarized light

100  $\mu\text{m}$



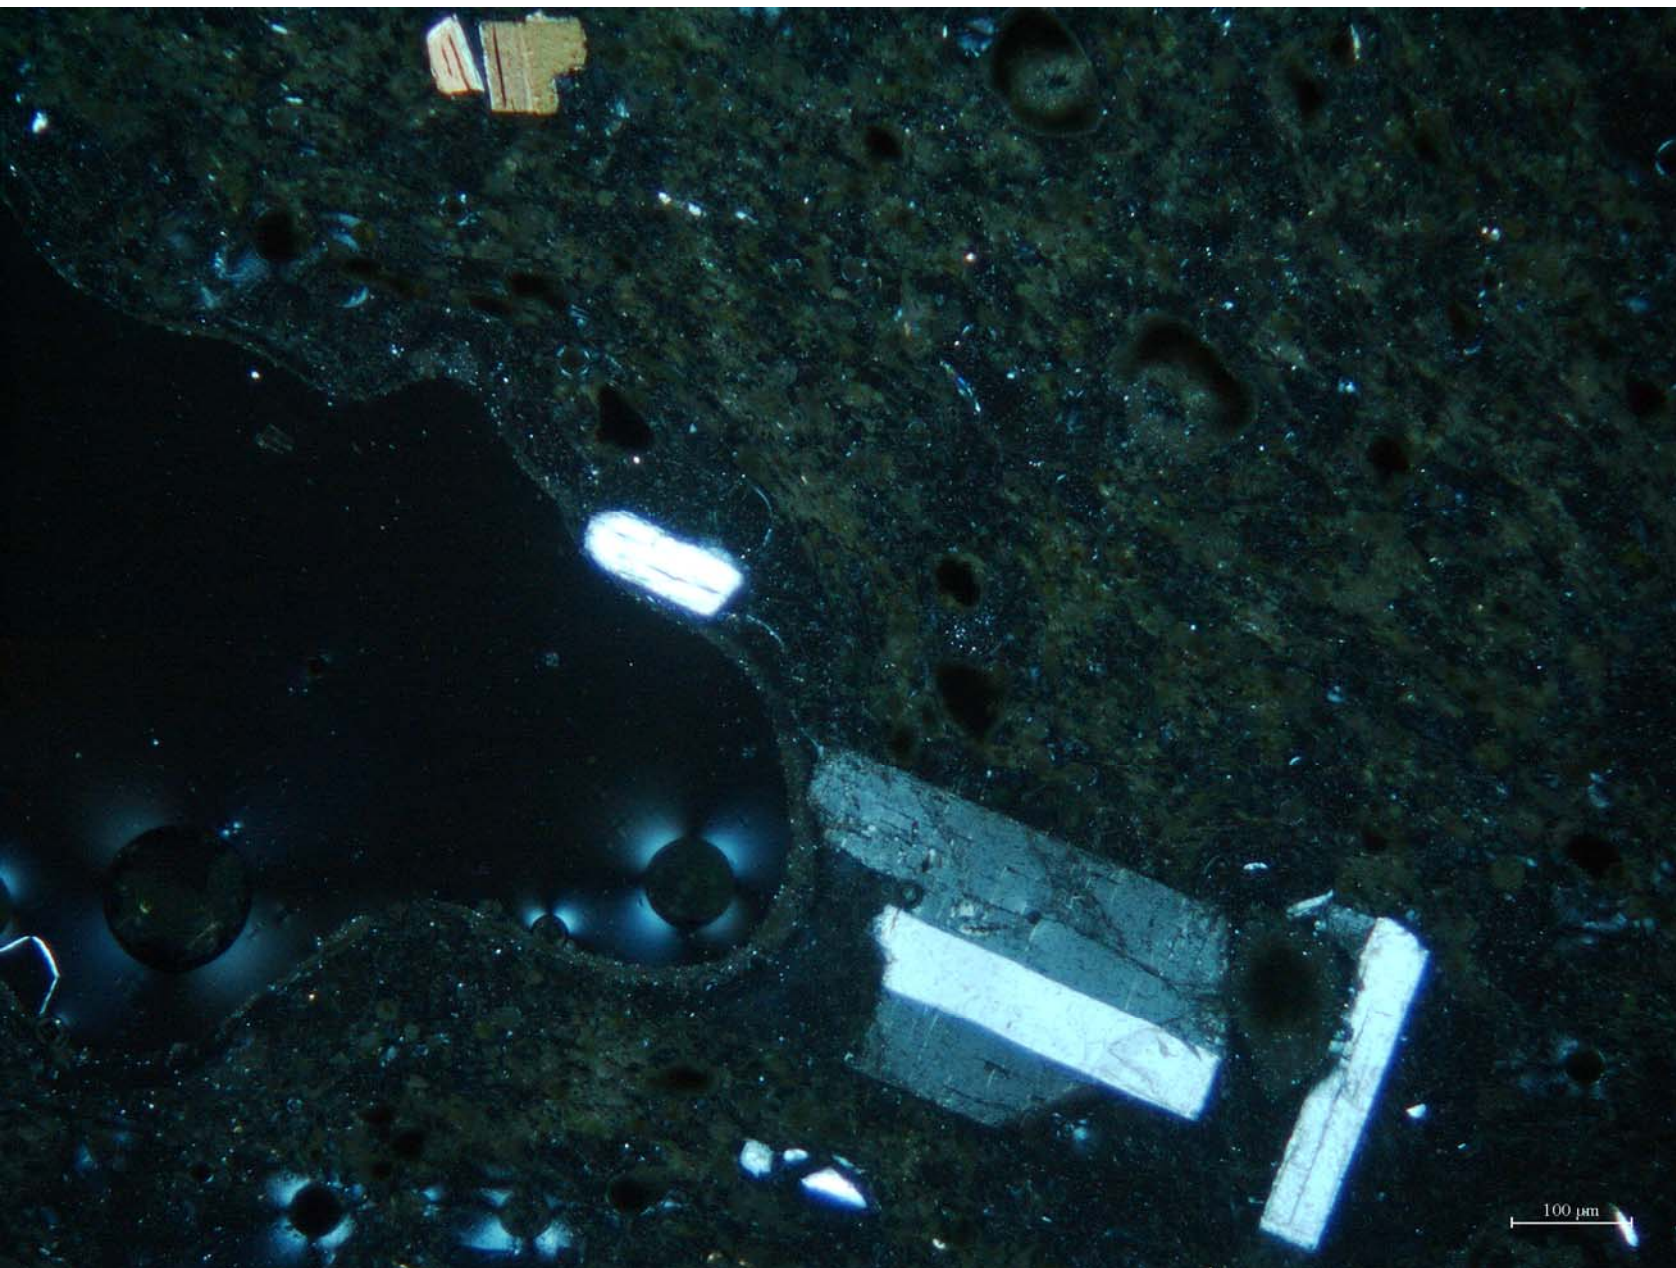

OIS0321 – c6\_1

cross polarized light



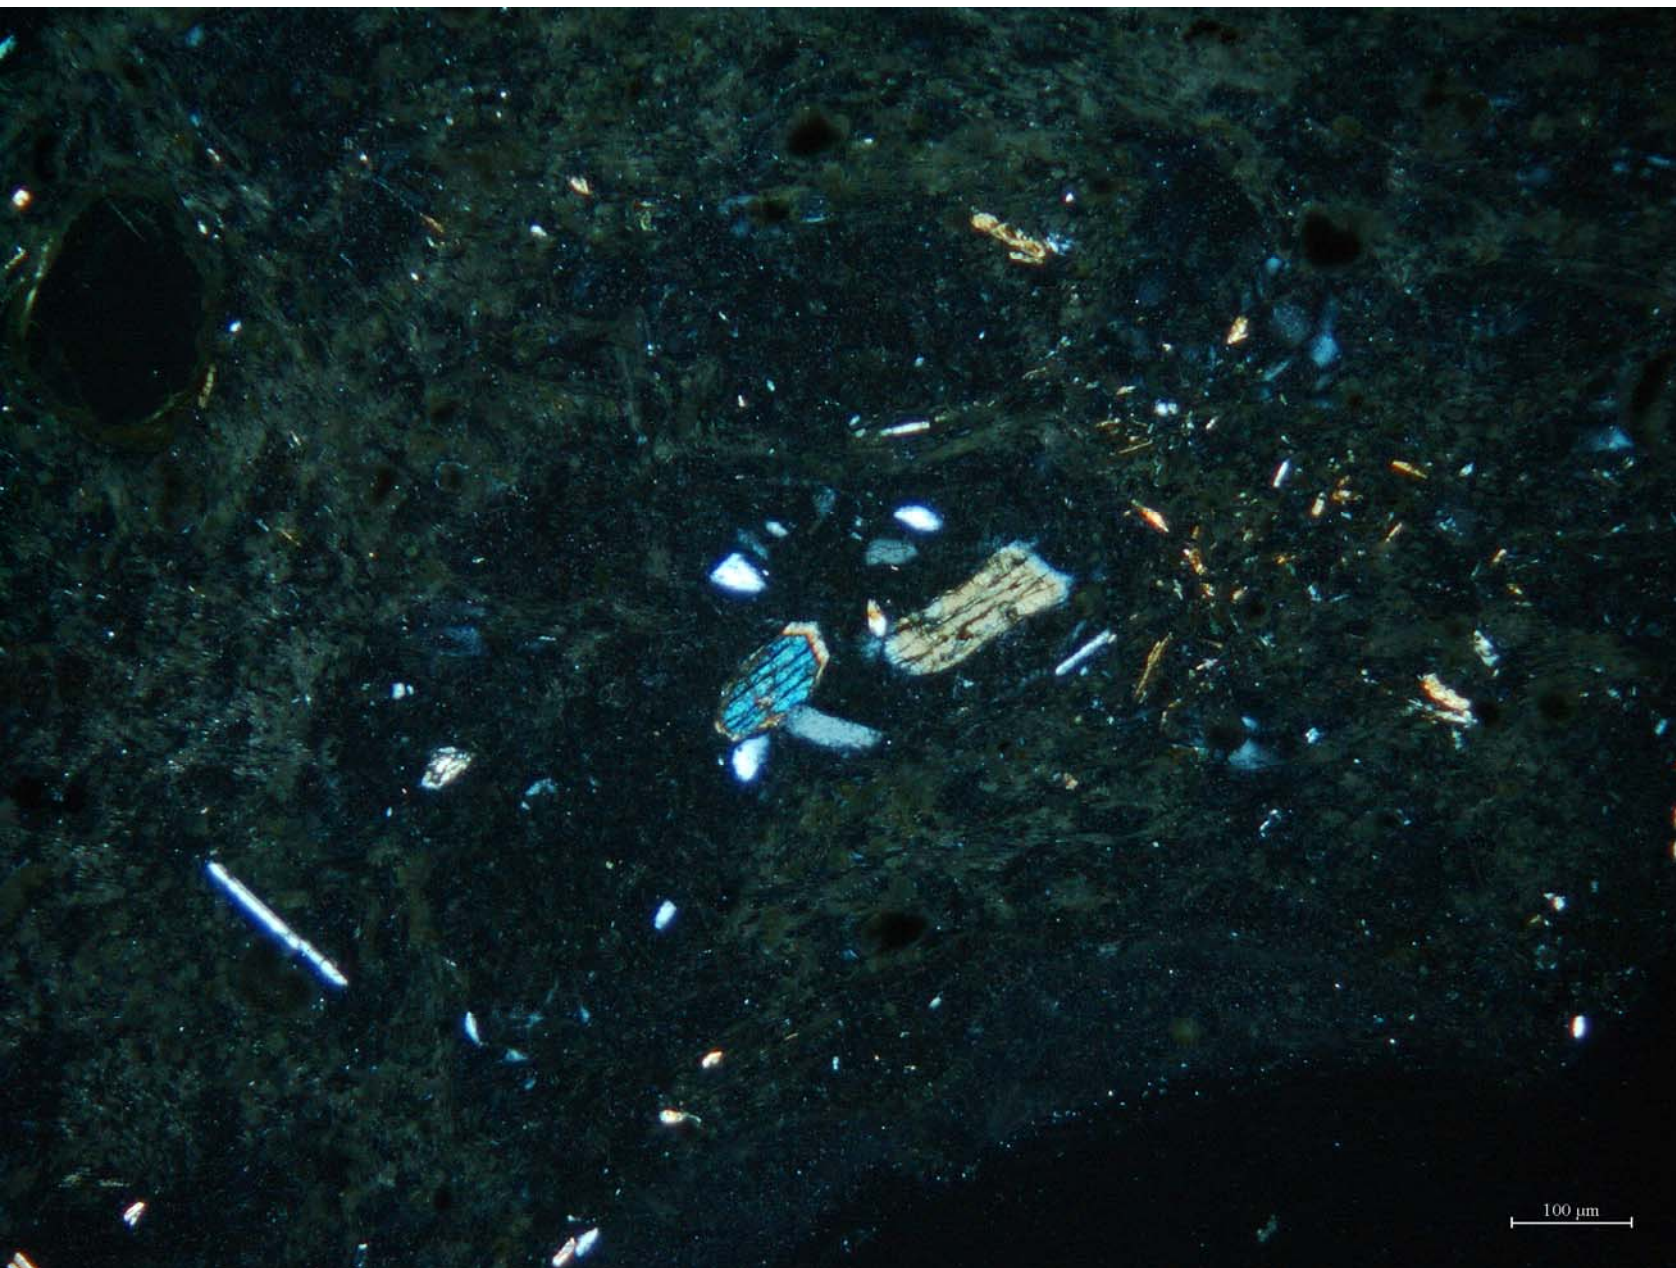

OIS0321 – c7\_1

cross polarized light



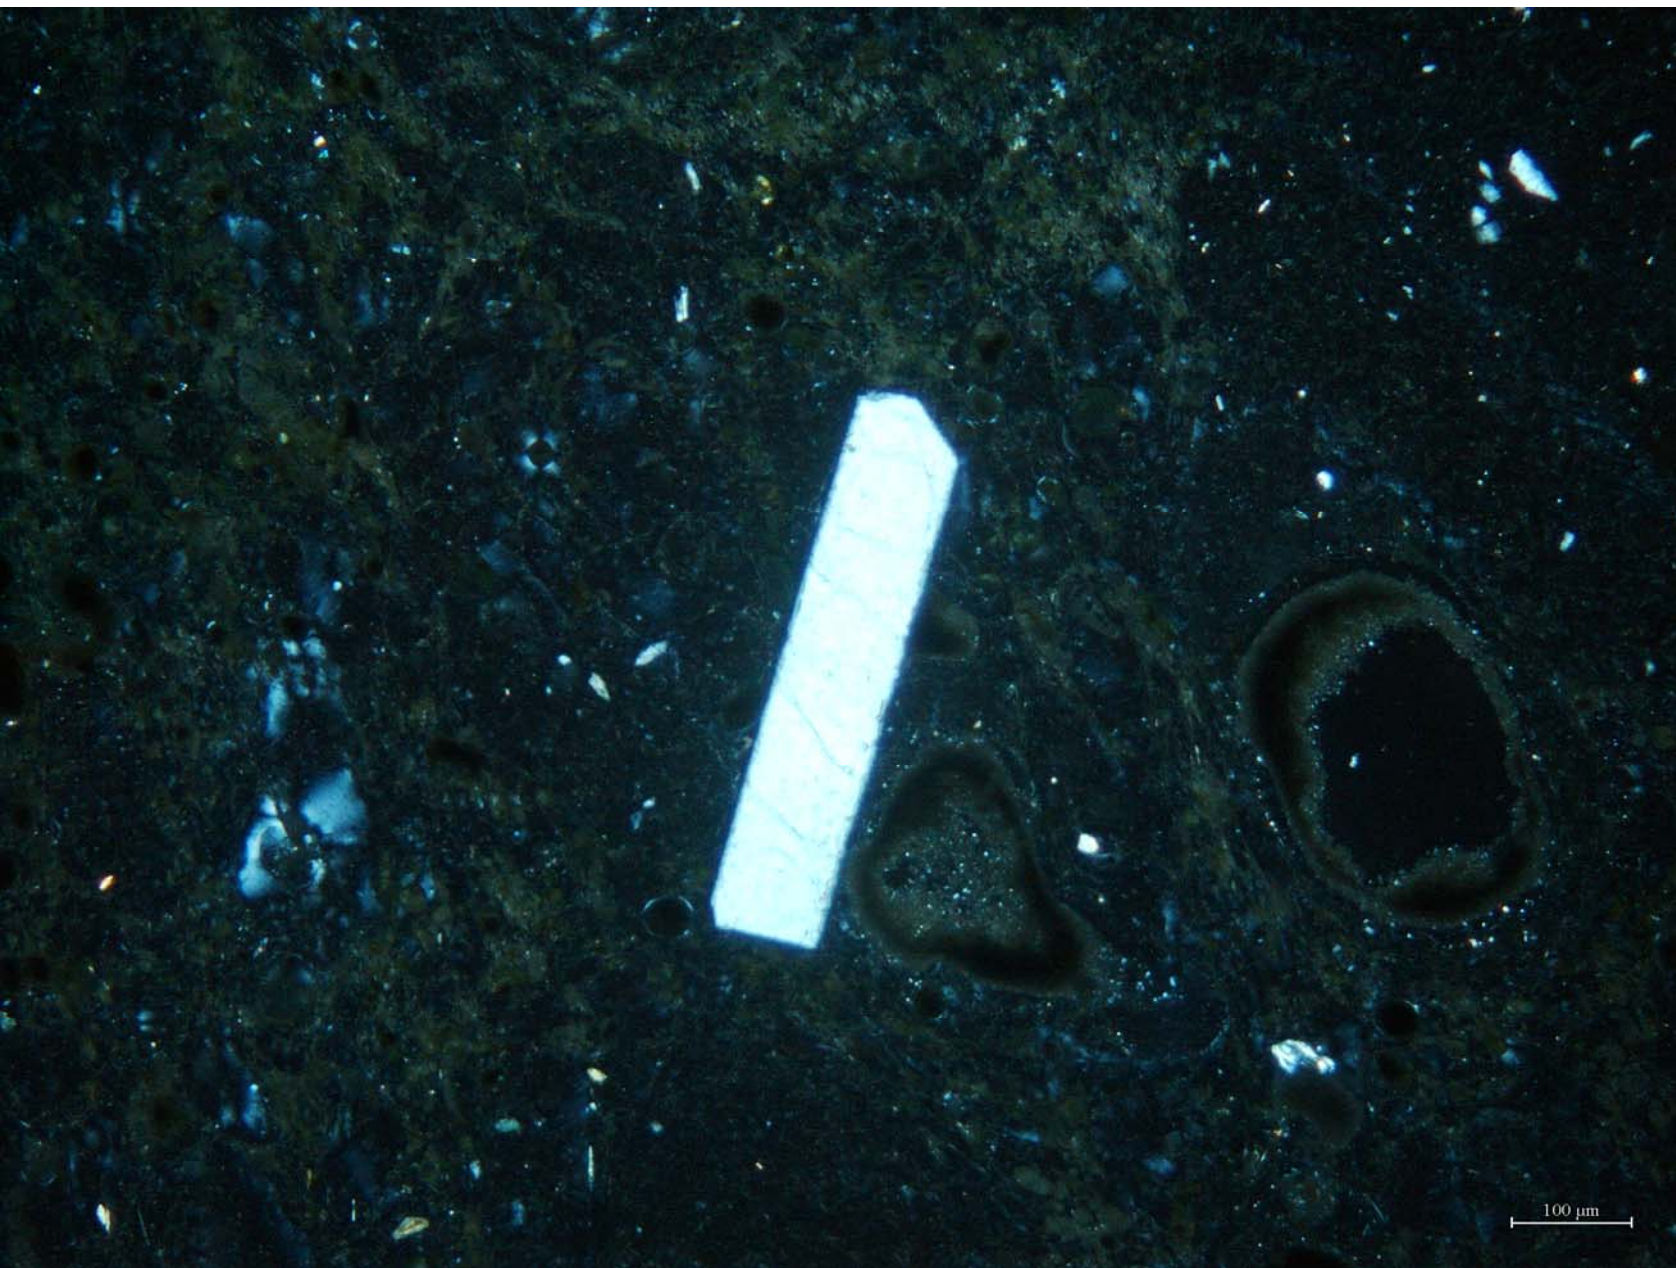

OIS0321 – c8\_1

cross polarized light

100  $\mu\text{m}$



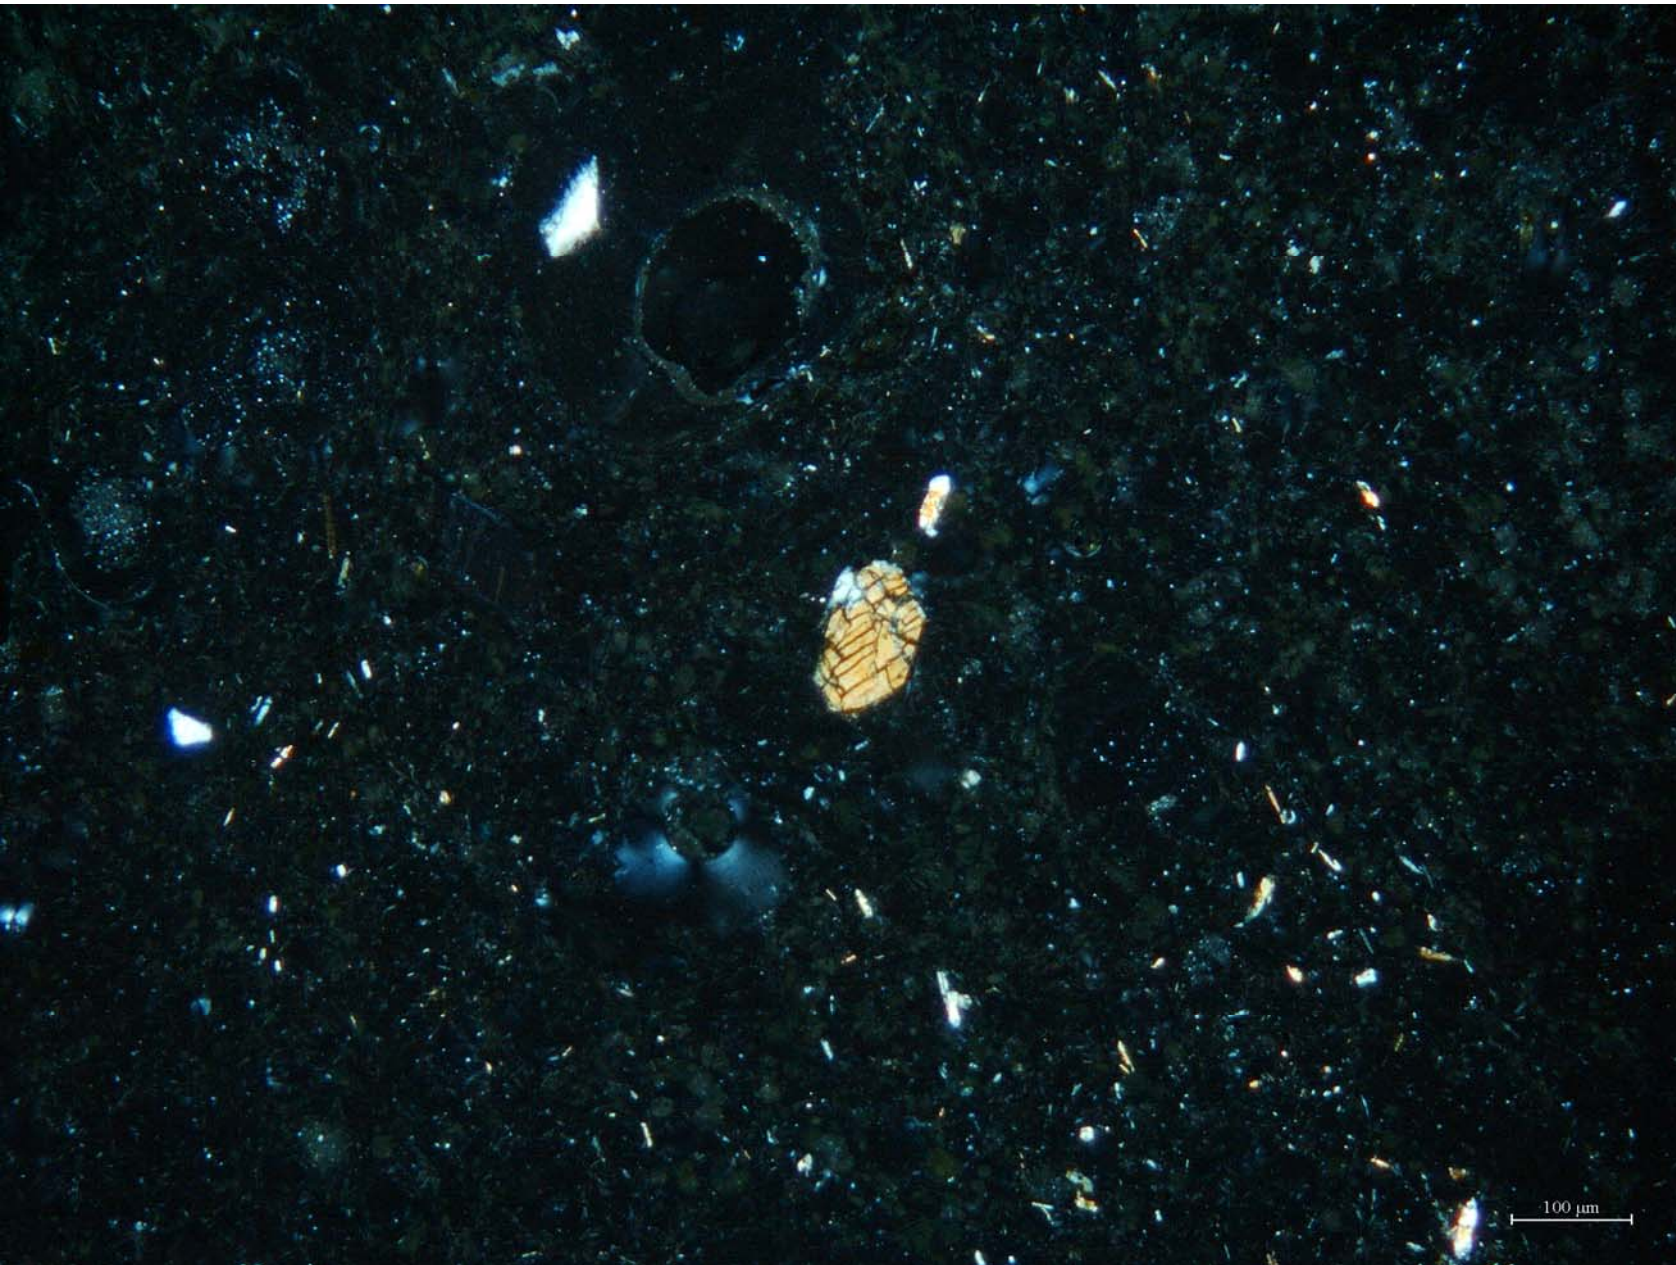

OIS0321 – c9\_1

cross polarized light



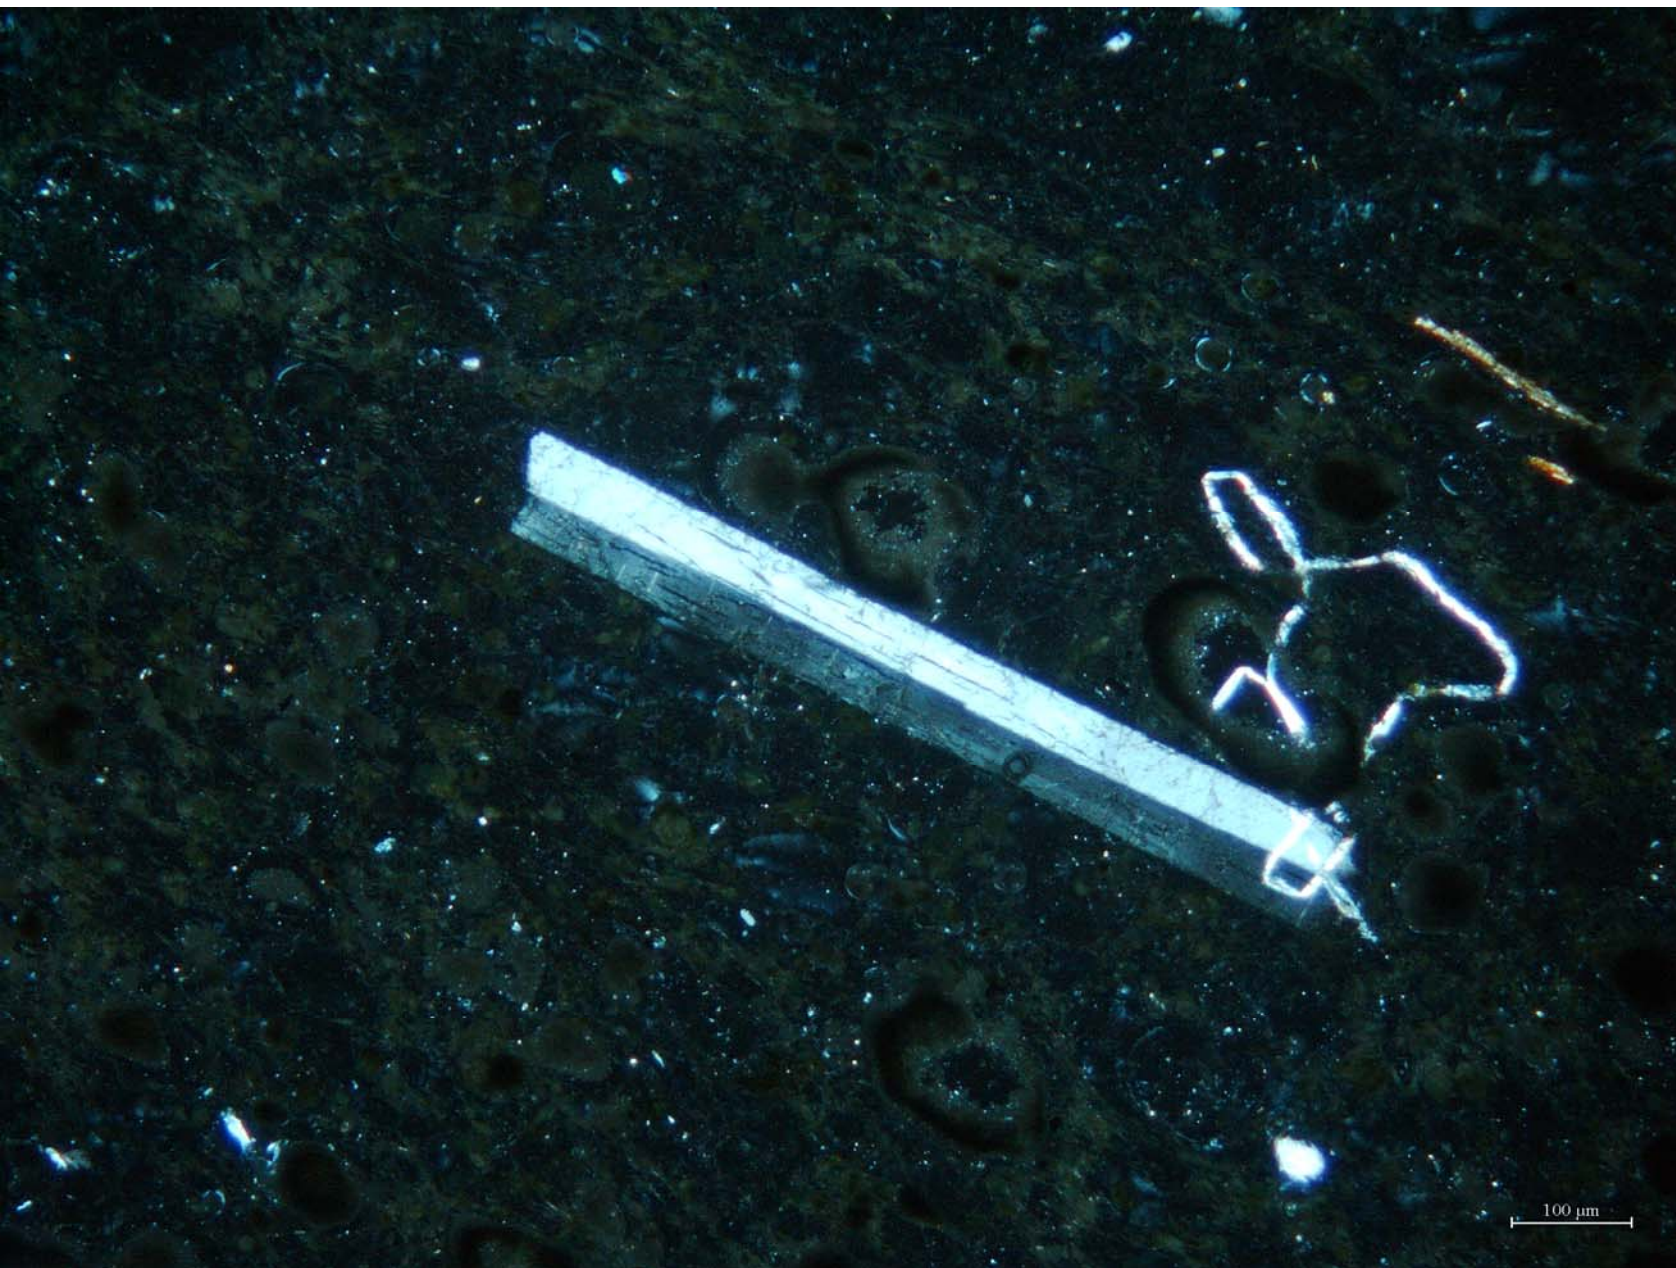

OIS0321 – c10\_1

cross polarized light



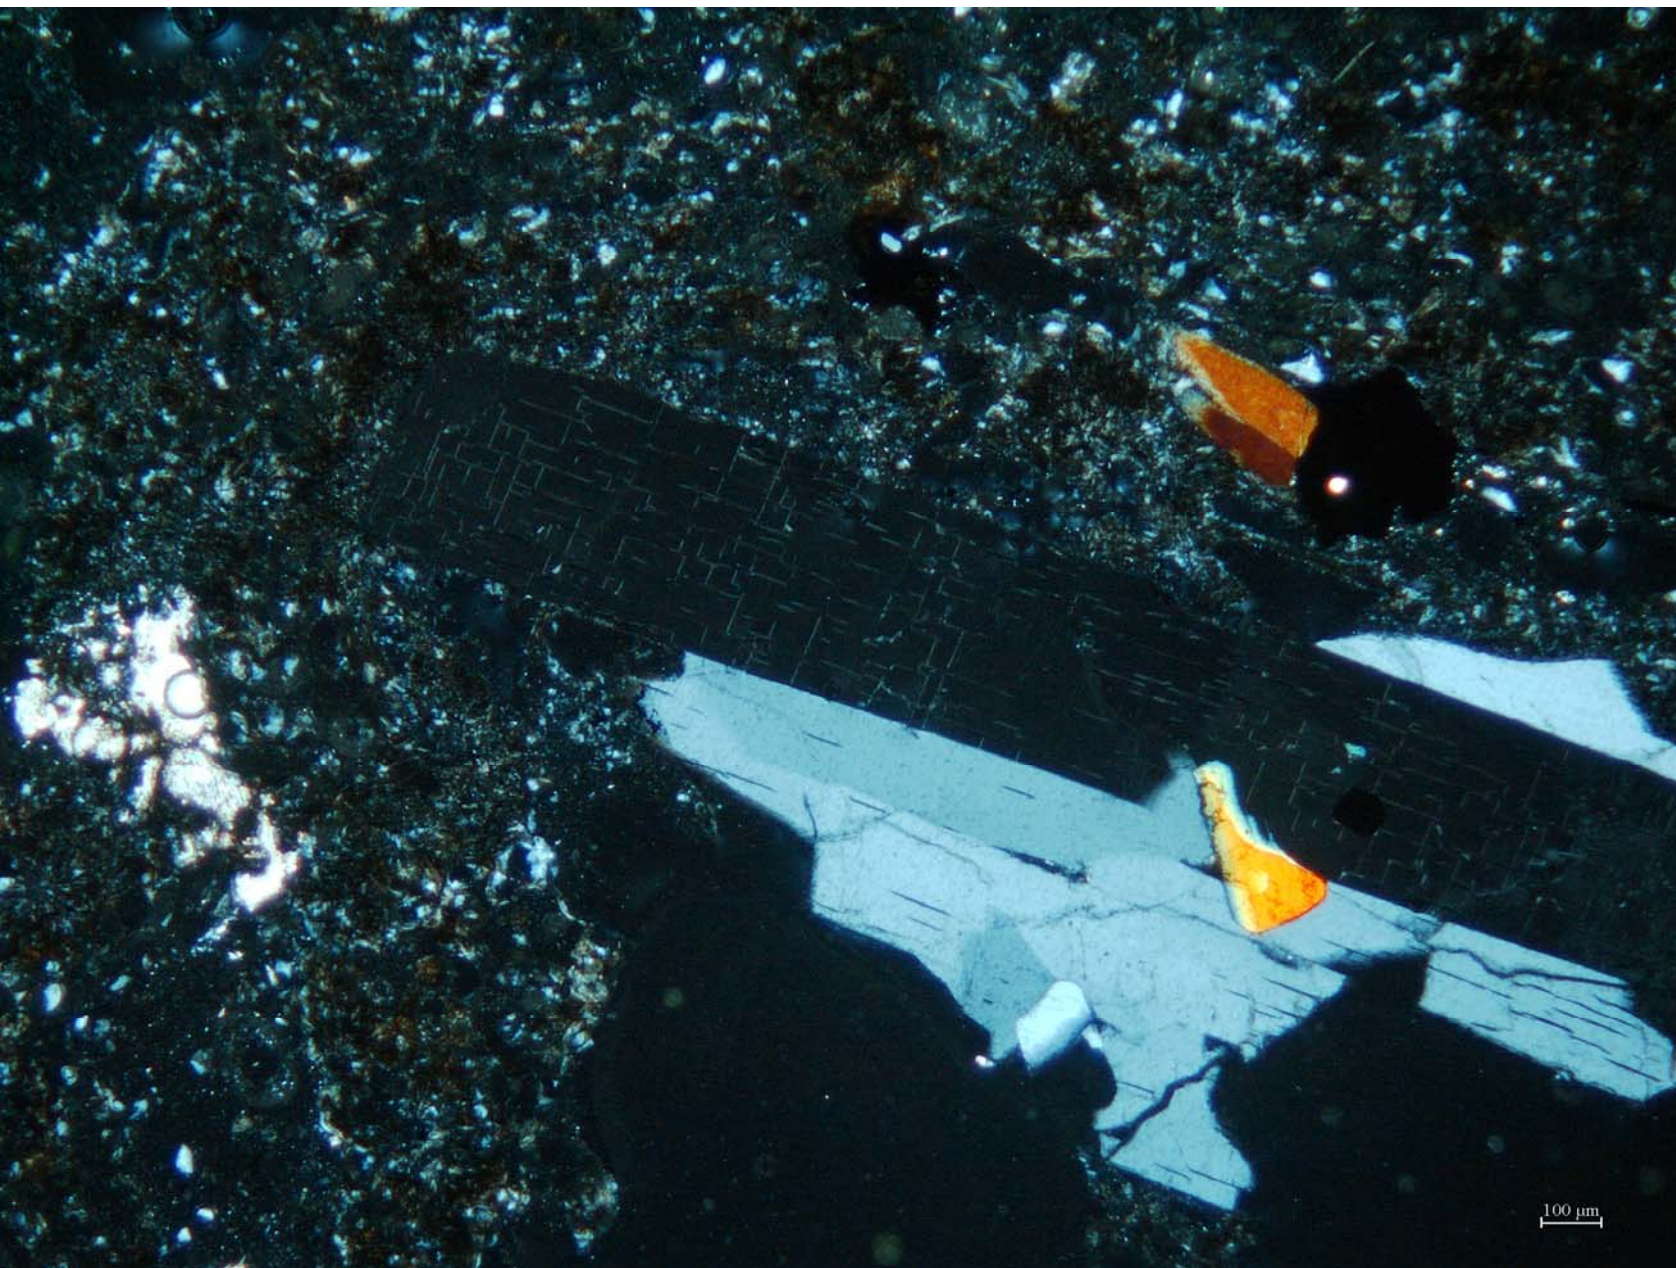

OIS0325 – c1\_1

cross polarized light



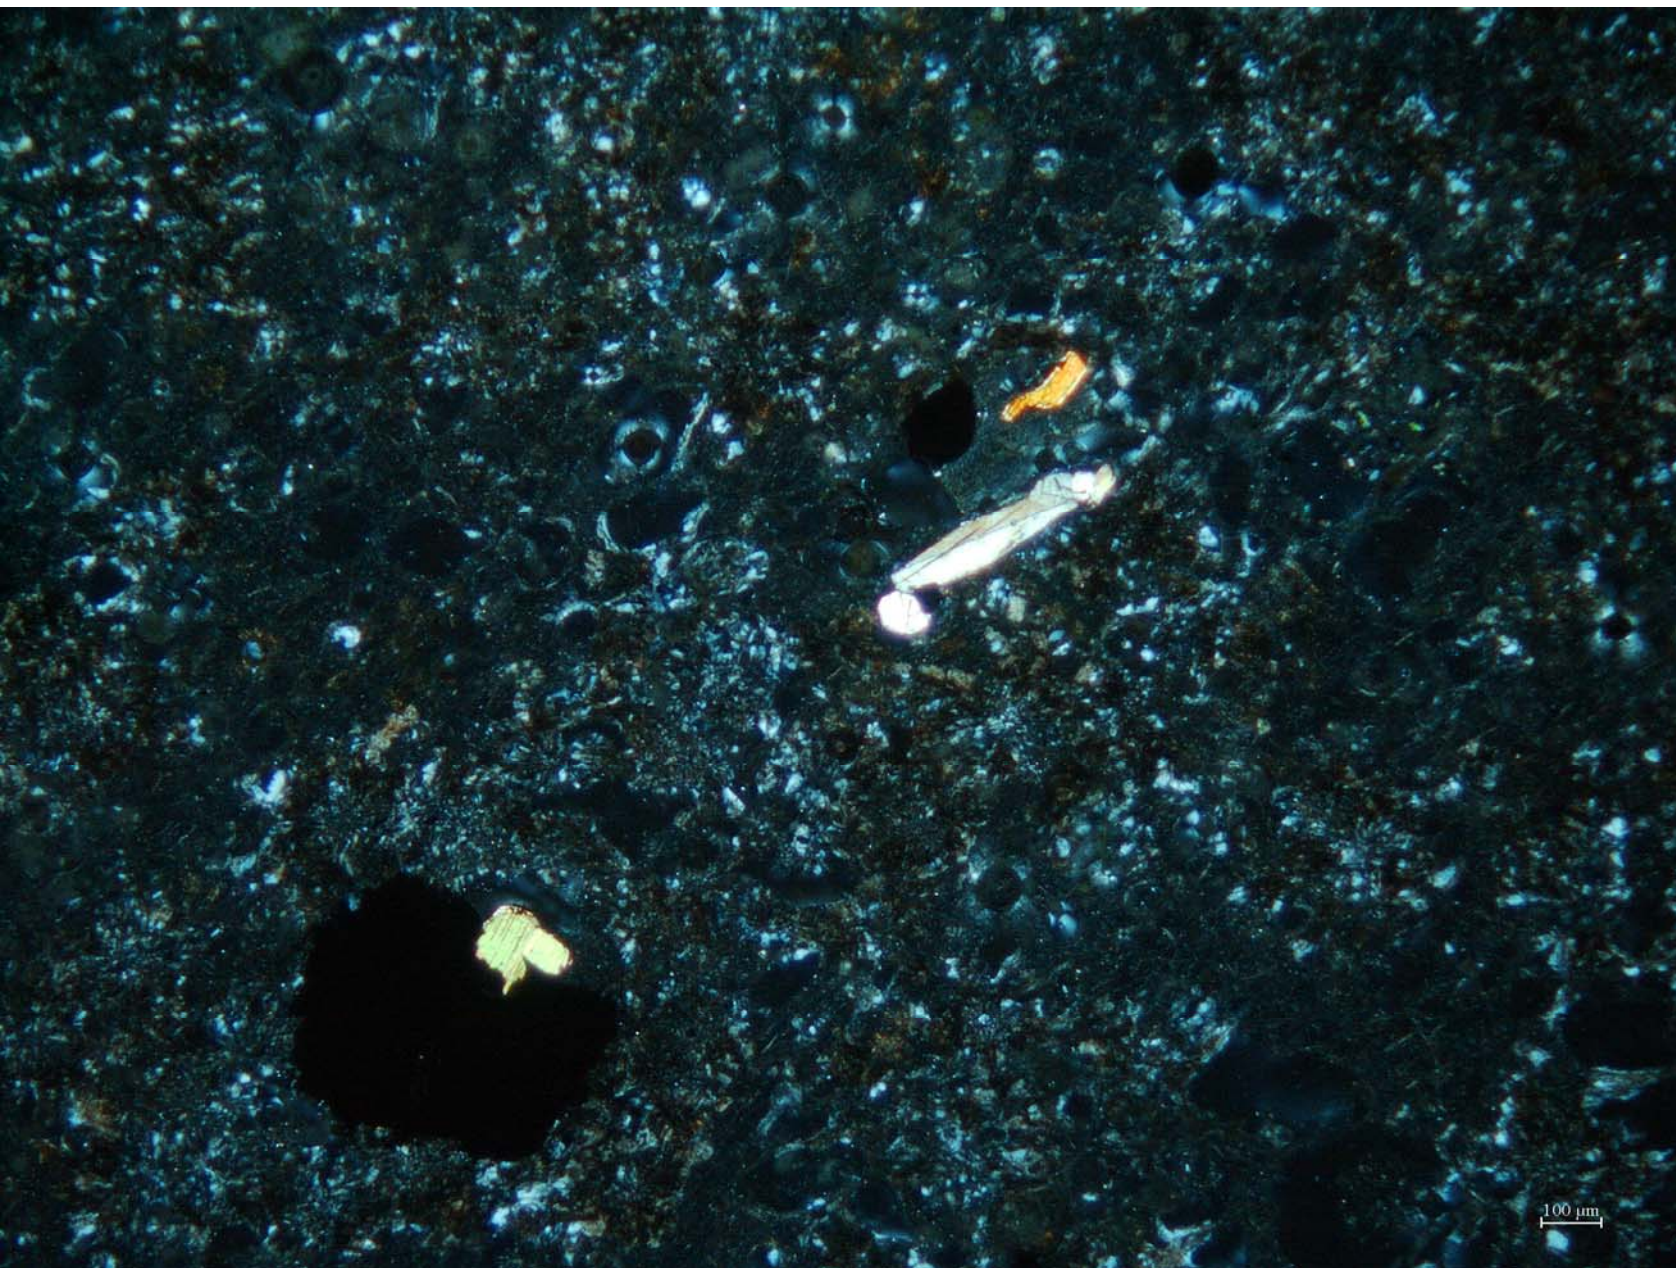

OIS0325 – c2\_1

cross polarized light



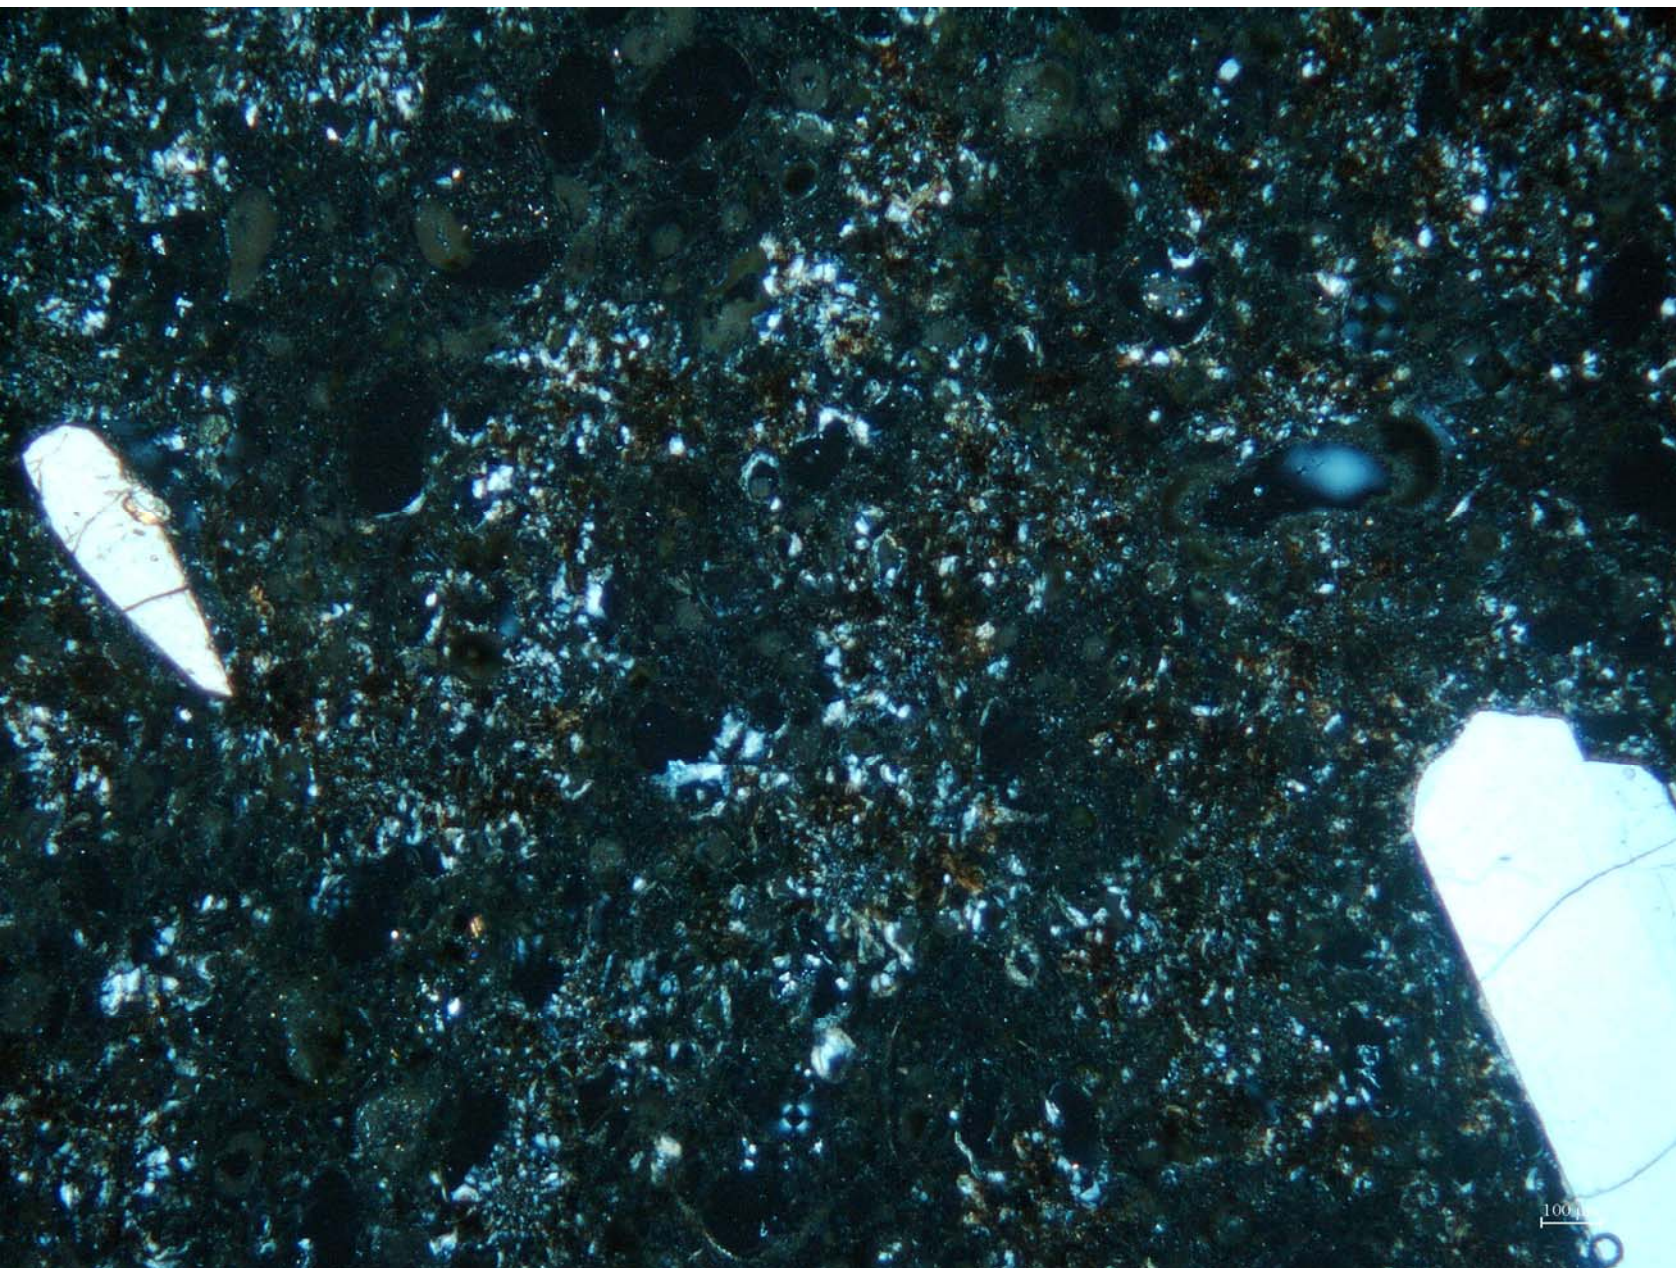

OIS0325 – c3\_1

cross polarized light

100μ



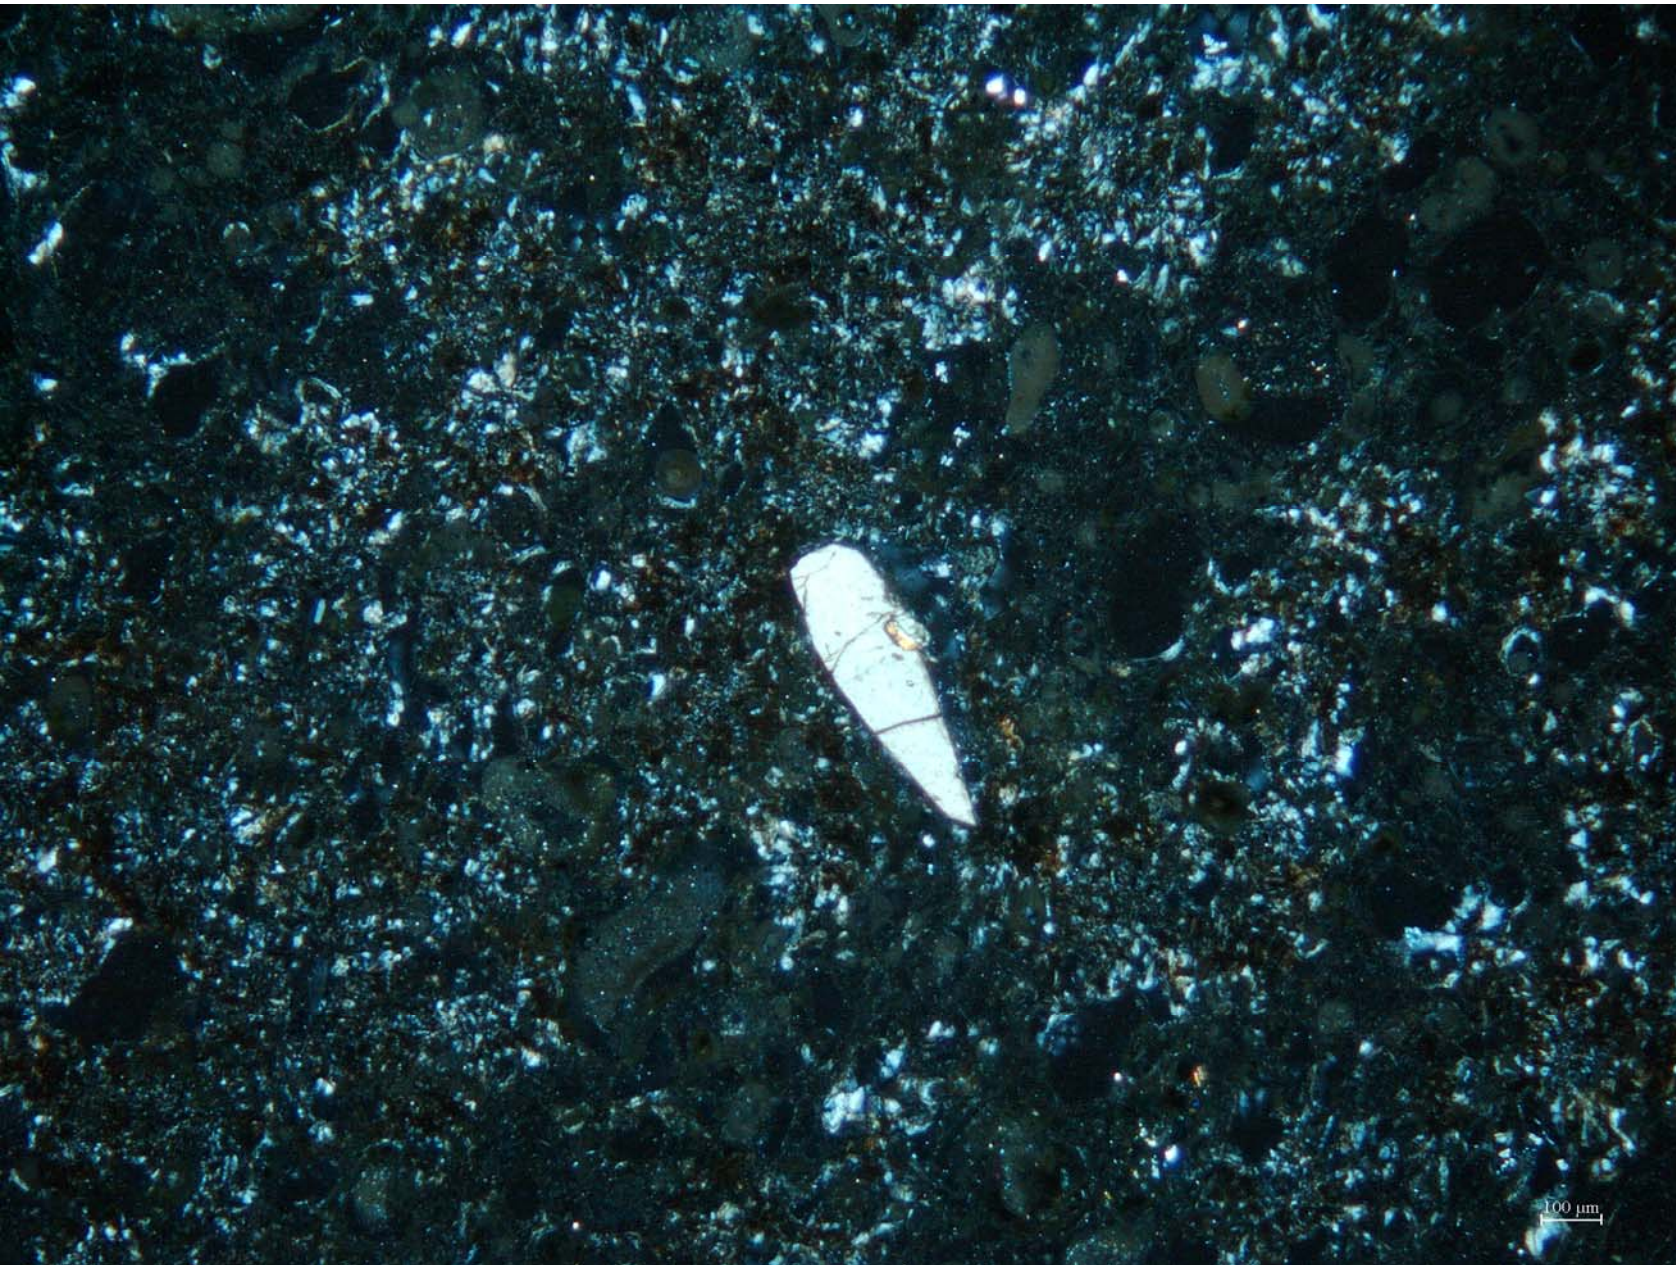

OIS0325 – c3\_2

cross polarized light



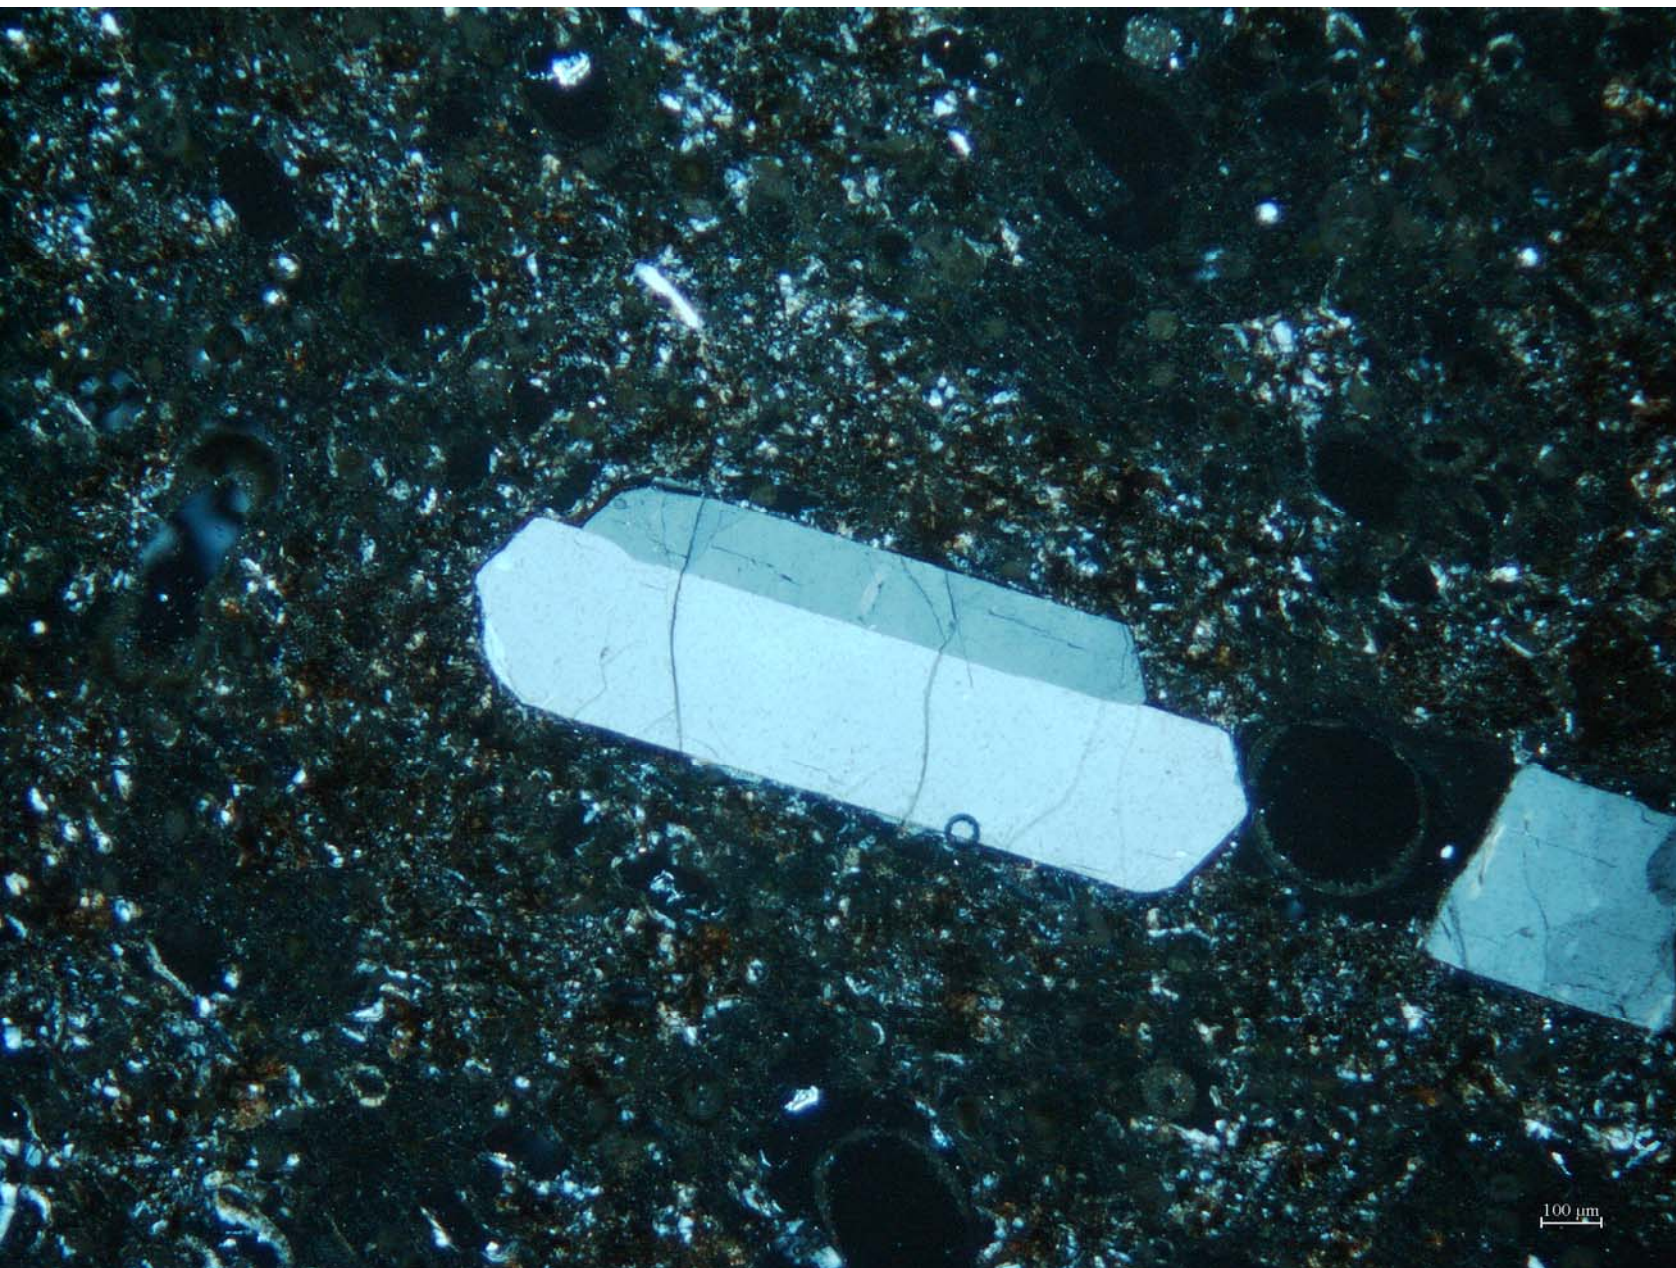

OIS0325 – c3\_3

cross polarized light



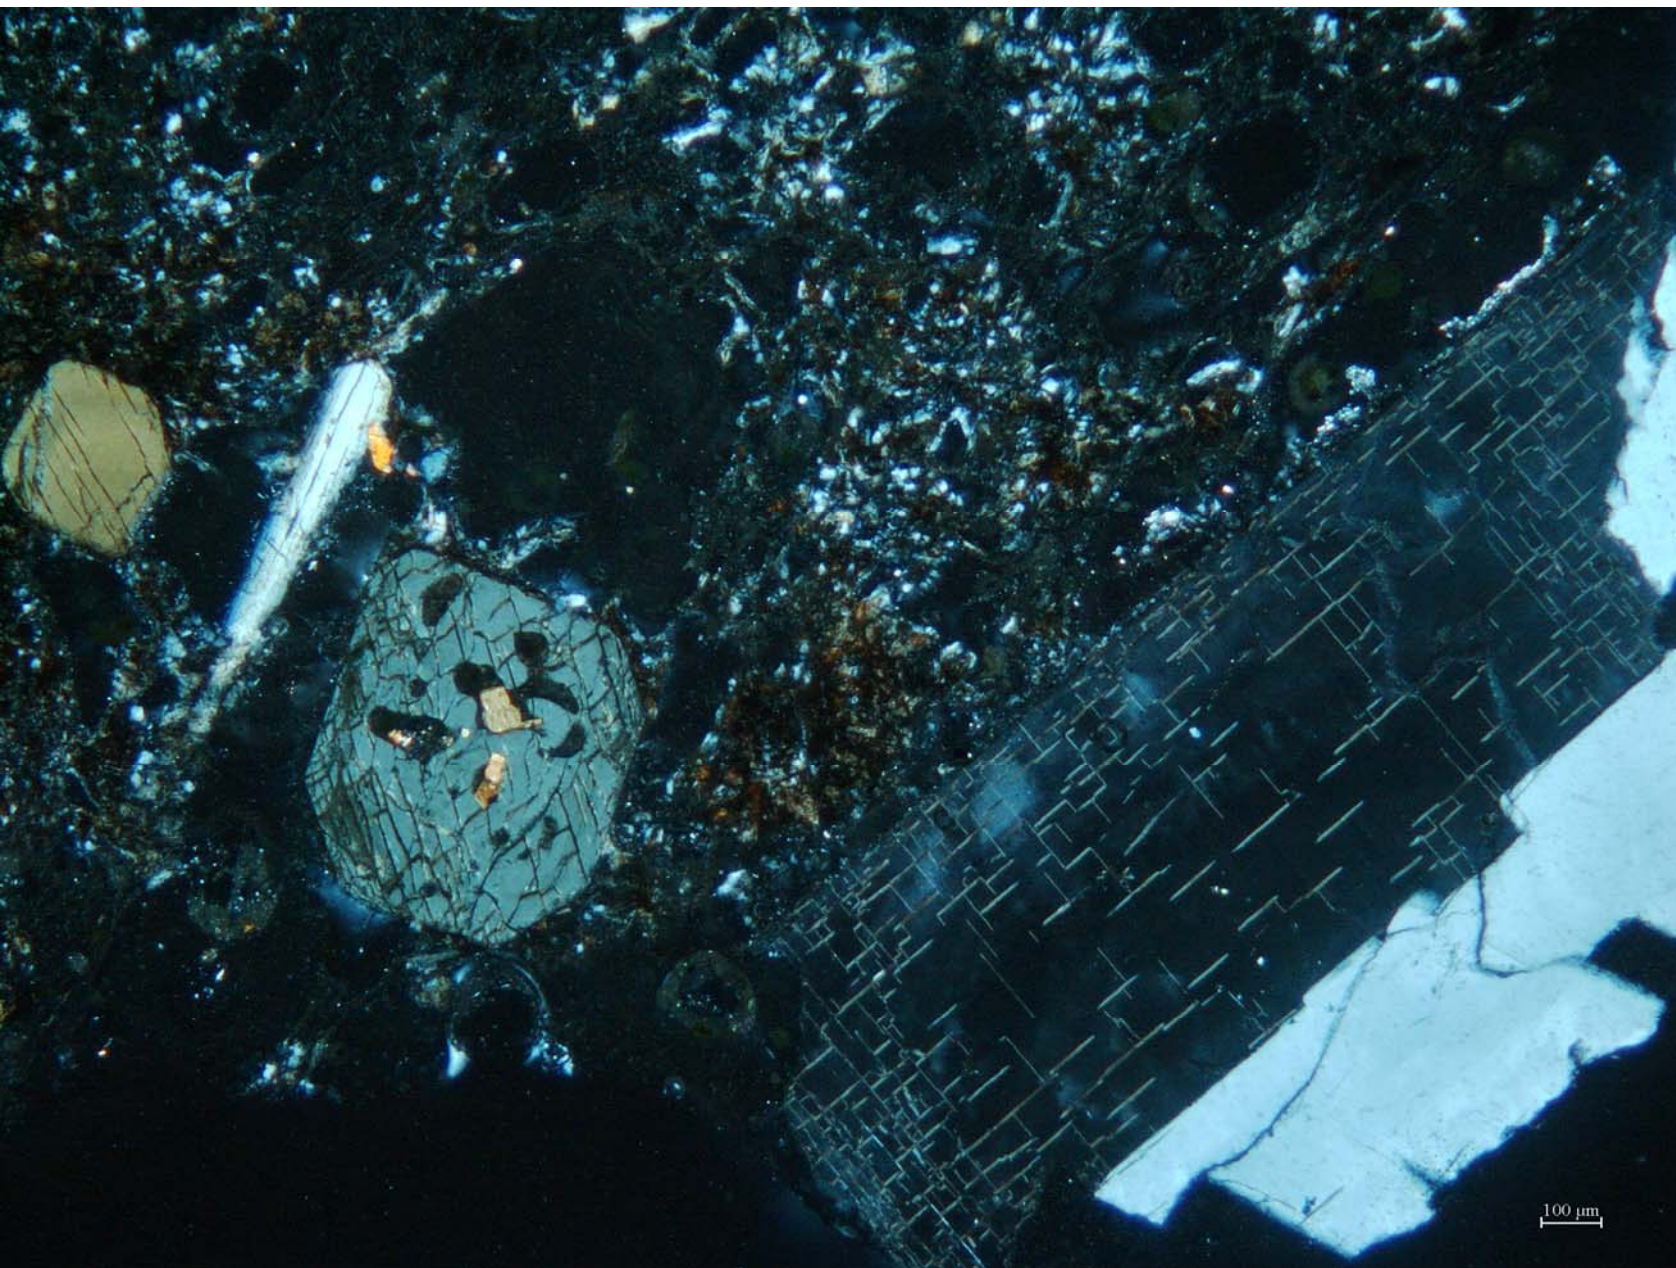

OIS0325 – c4\_1

cross polarized light



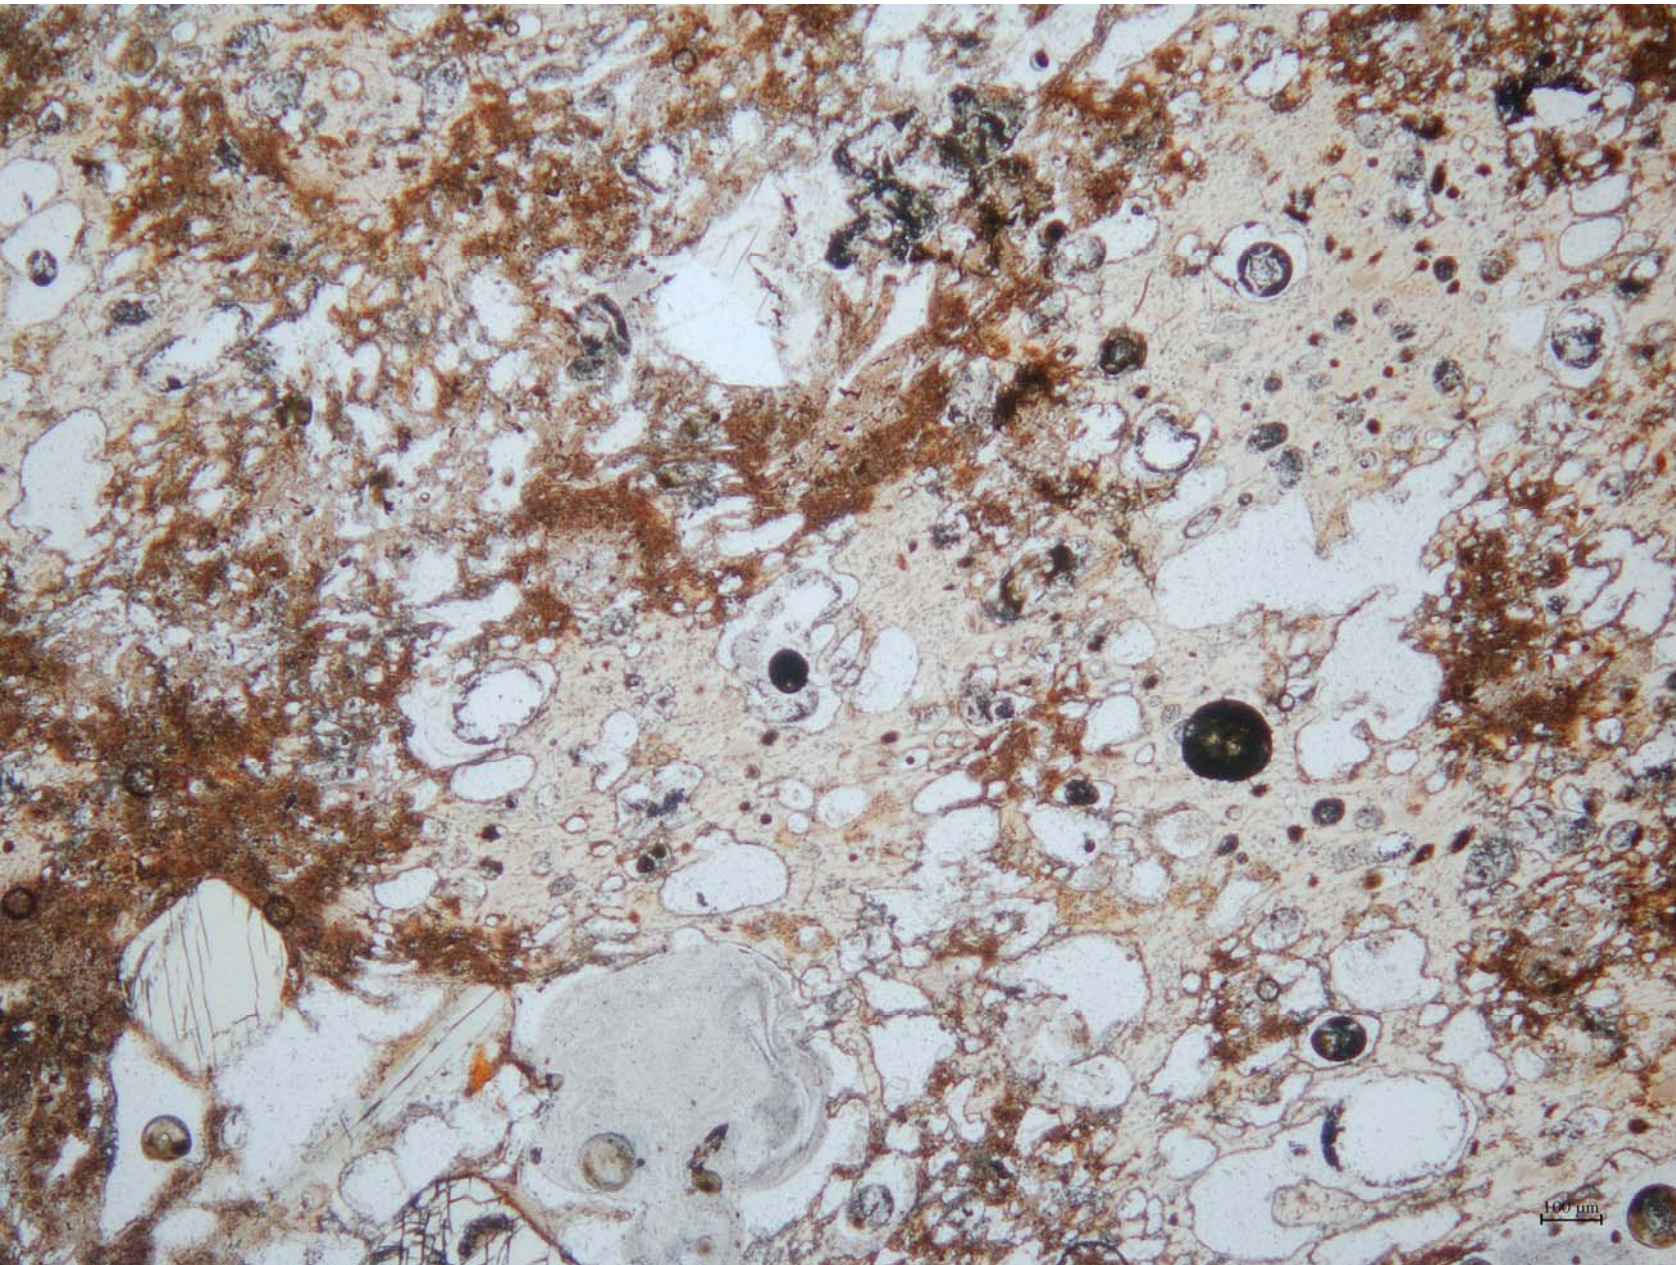

OIS0325 - c4\_2

plane polarized light



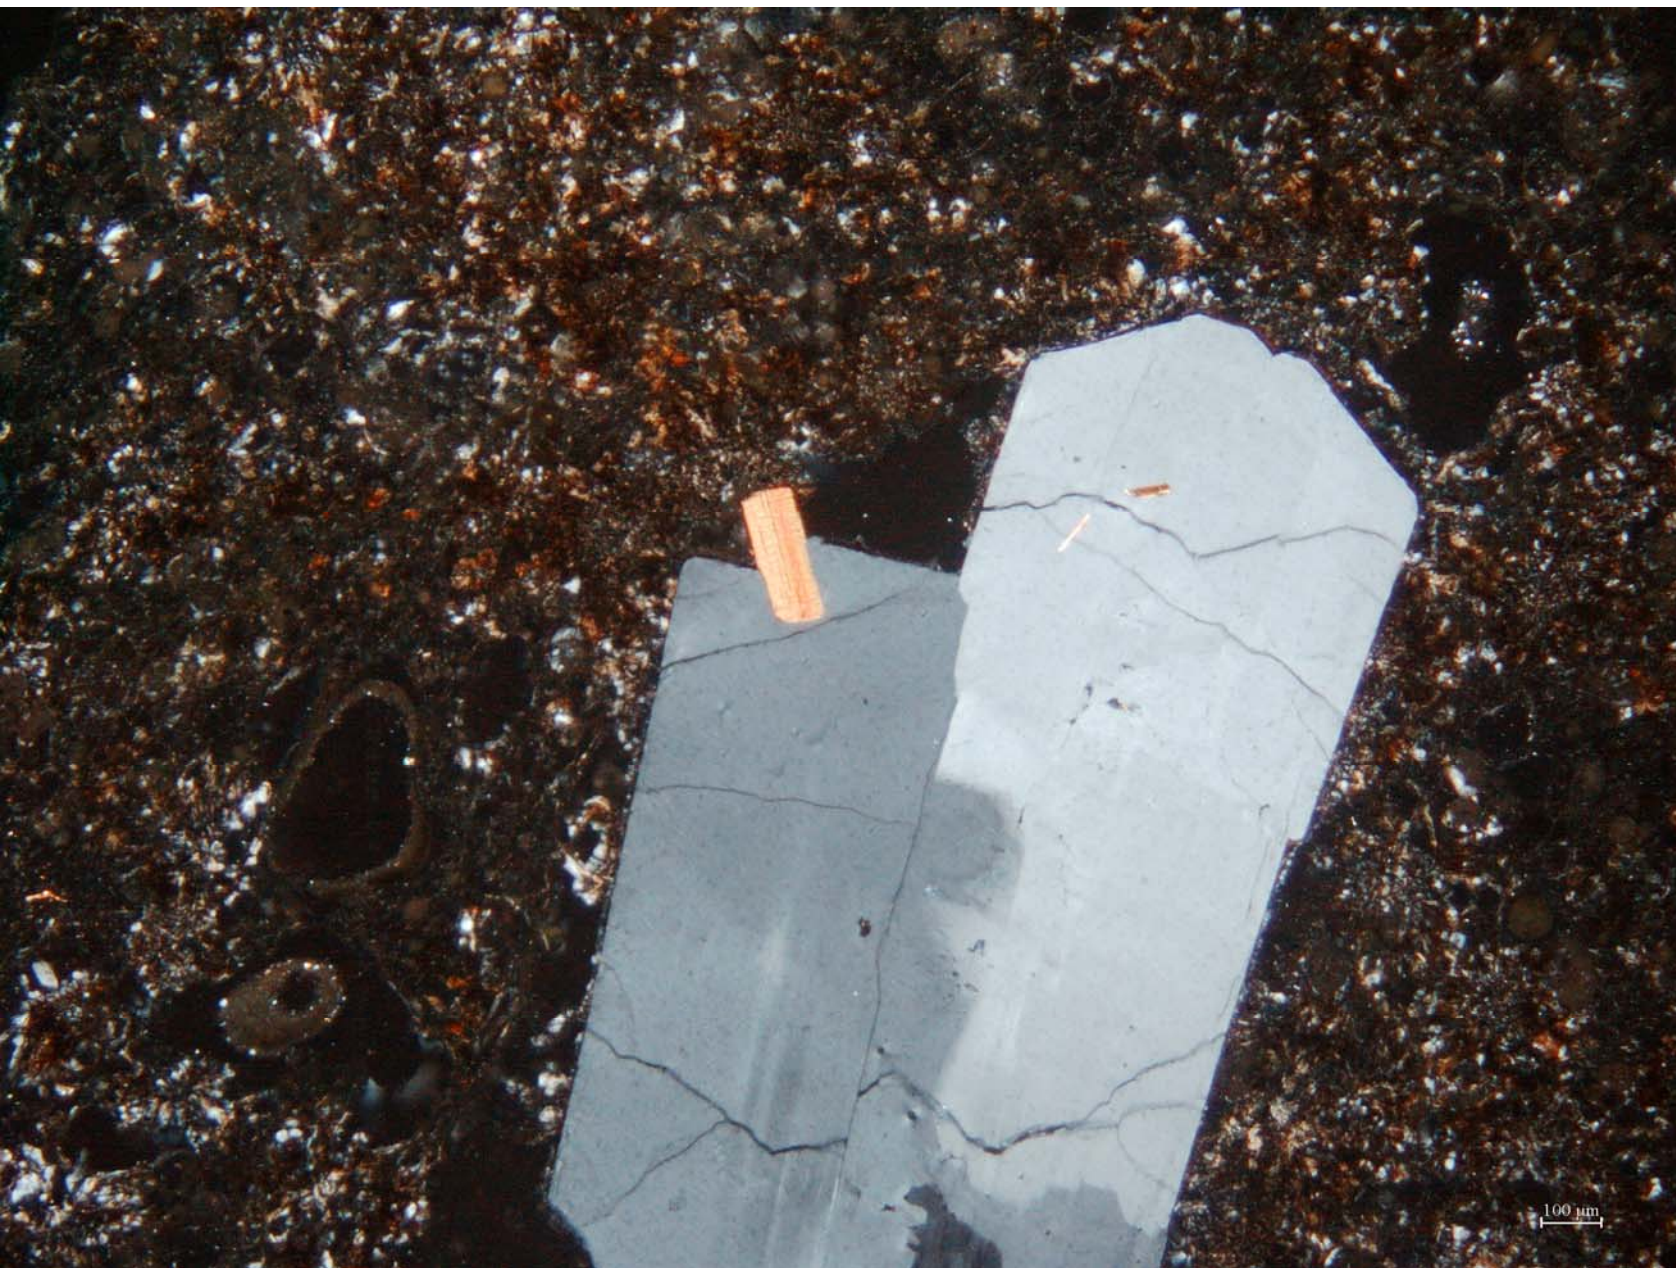

OIS0325 – c5\_1

cross polarized light



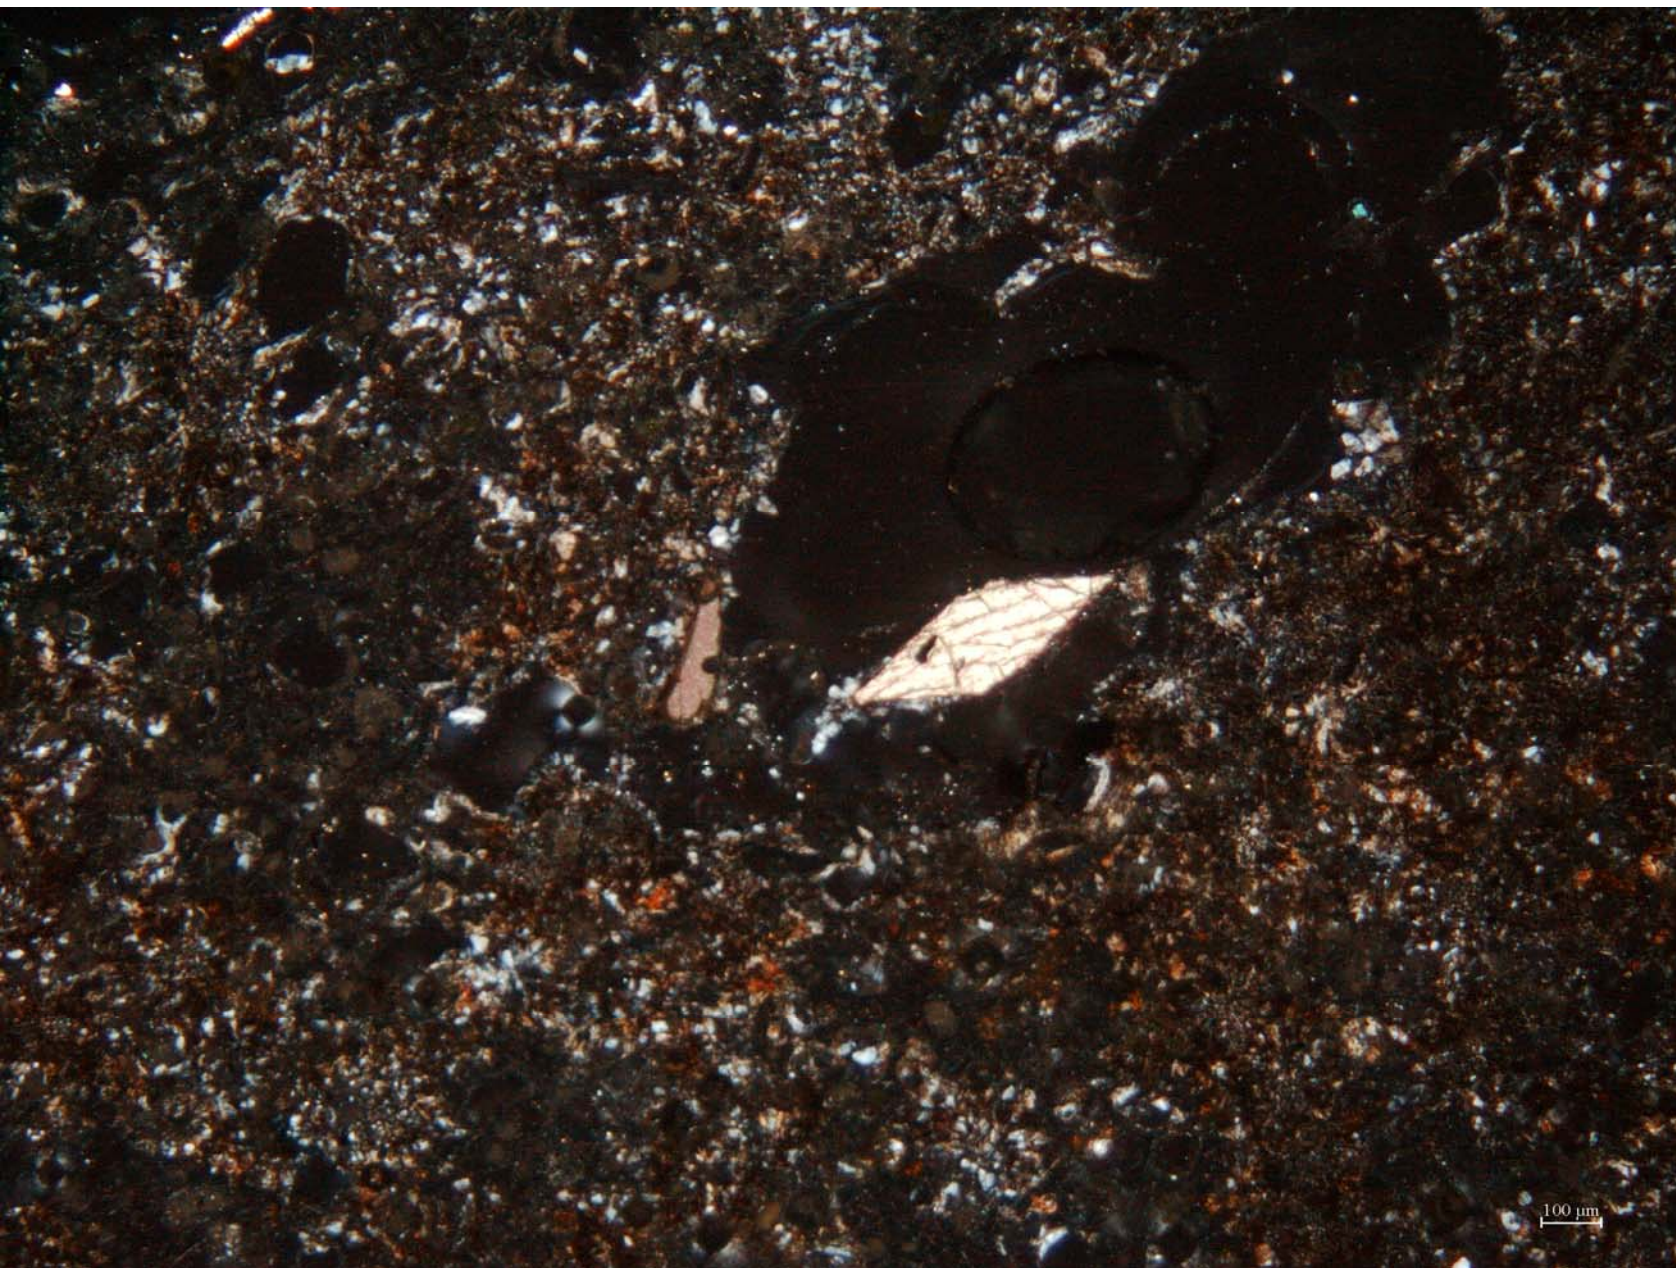

OIS0325 – c5\_2

cross polarized light



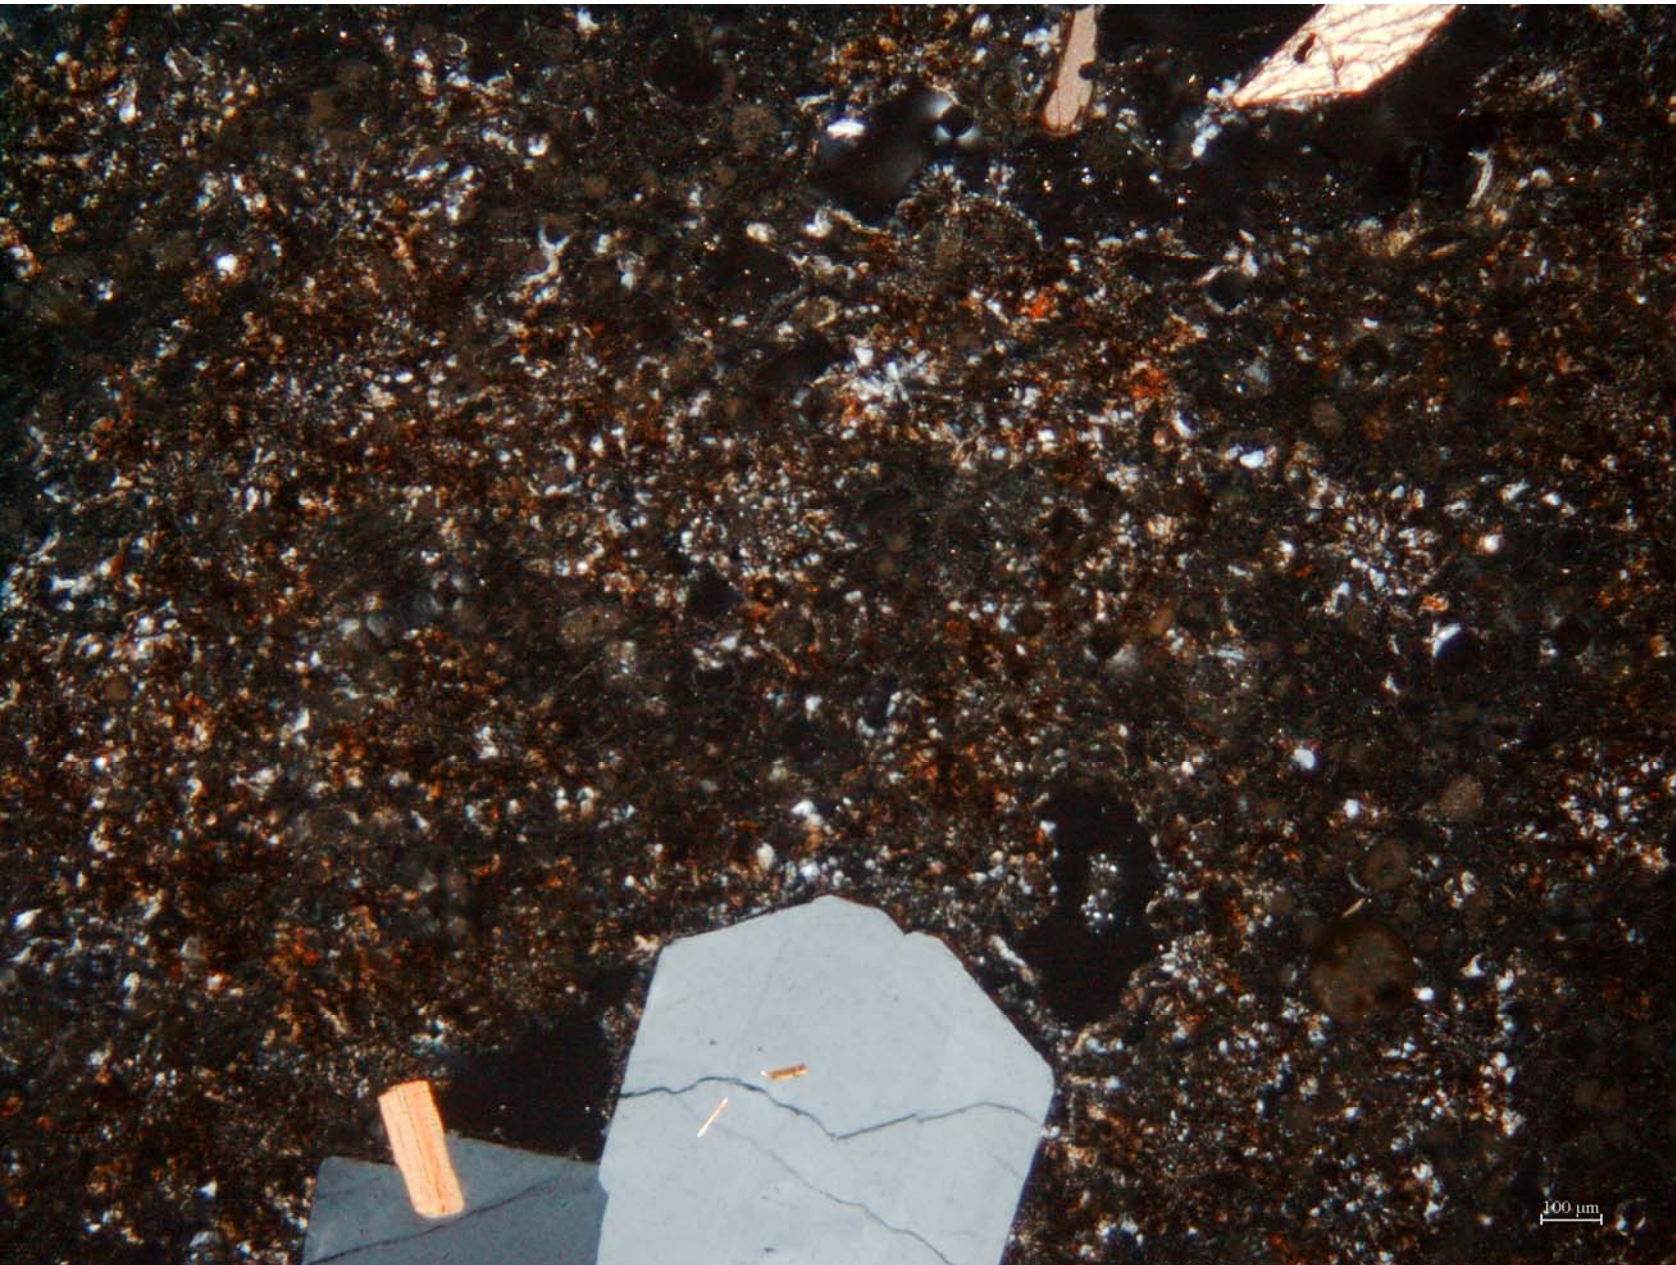

OIS0325 - c5\_3

cross polarized light



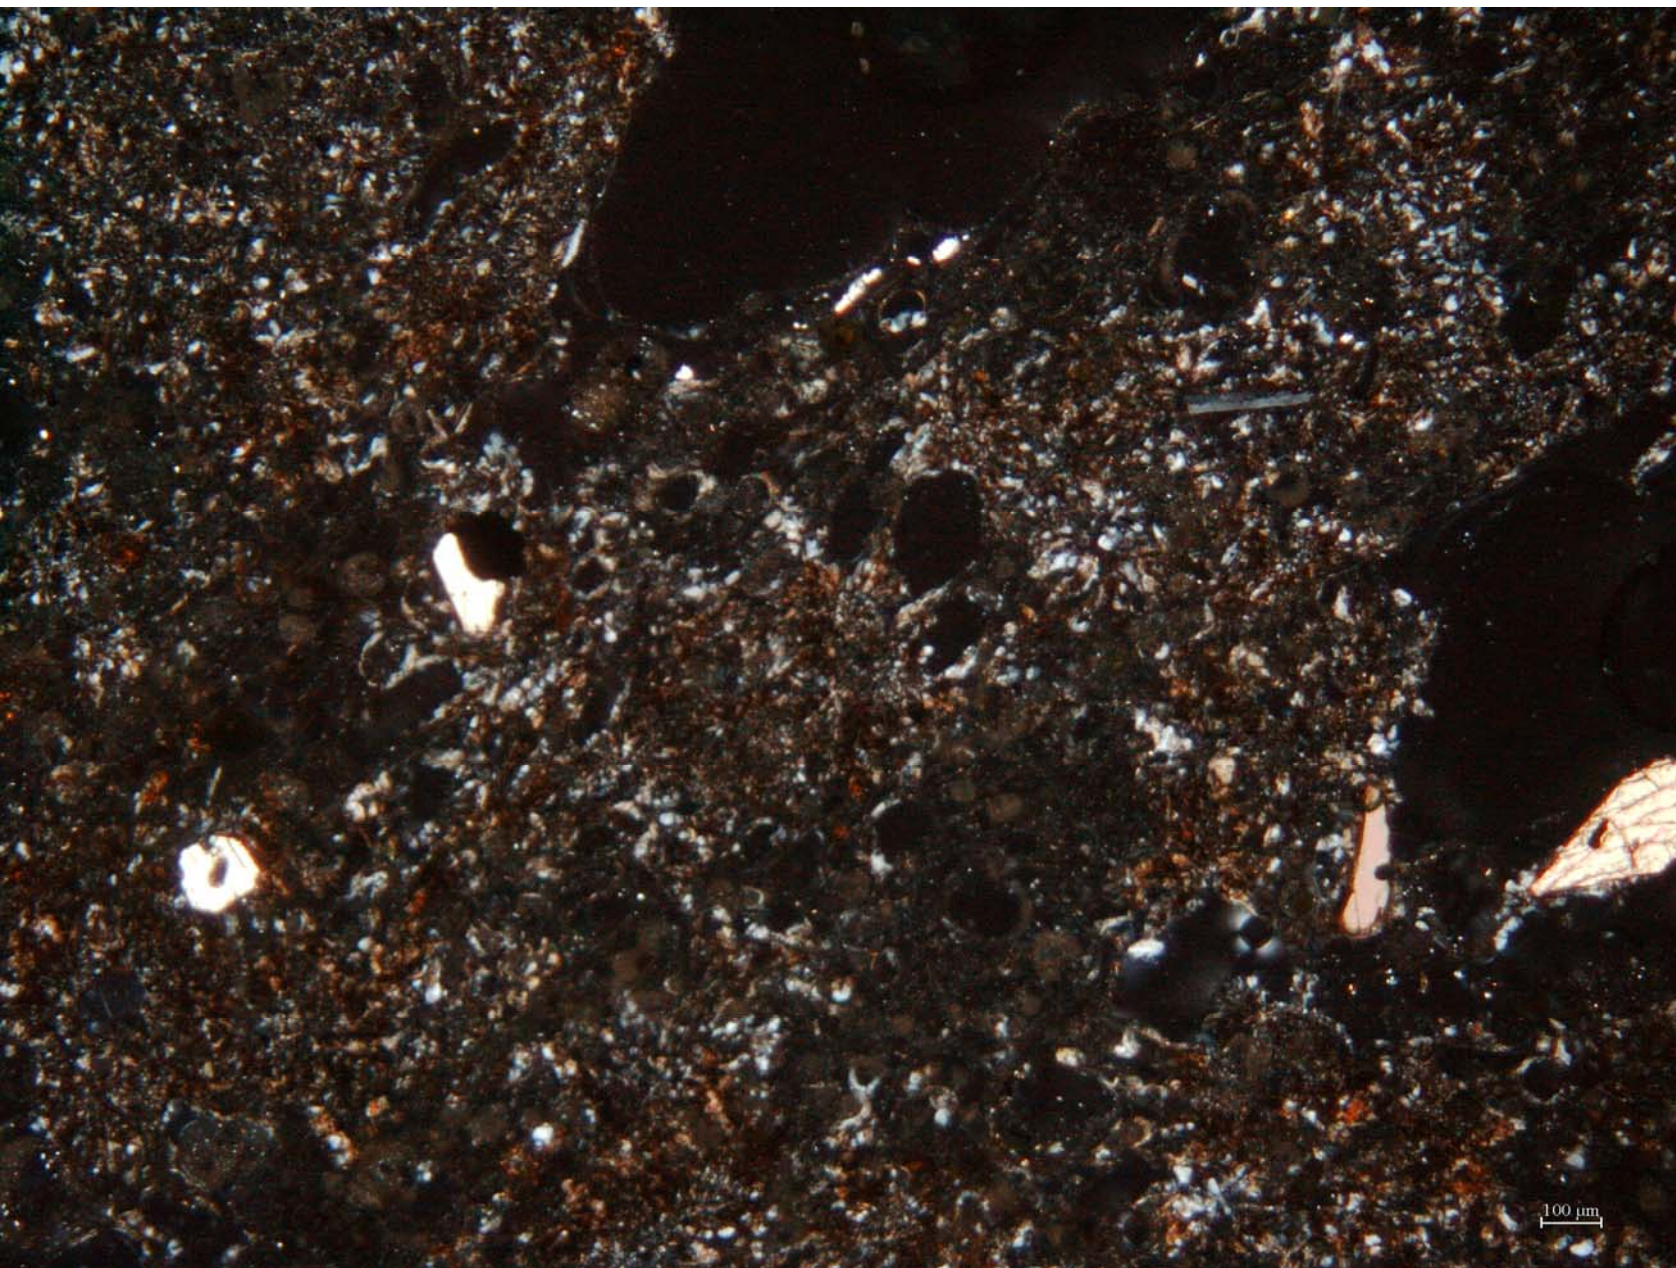

OIS0325 – c5\_4

cross polarized light



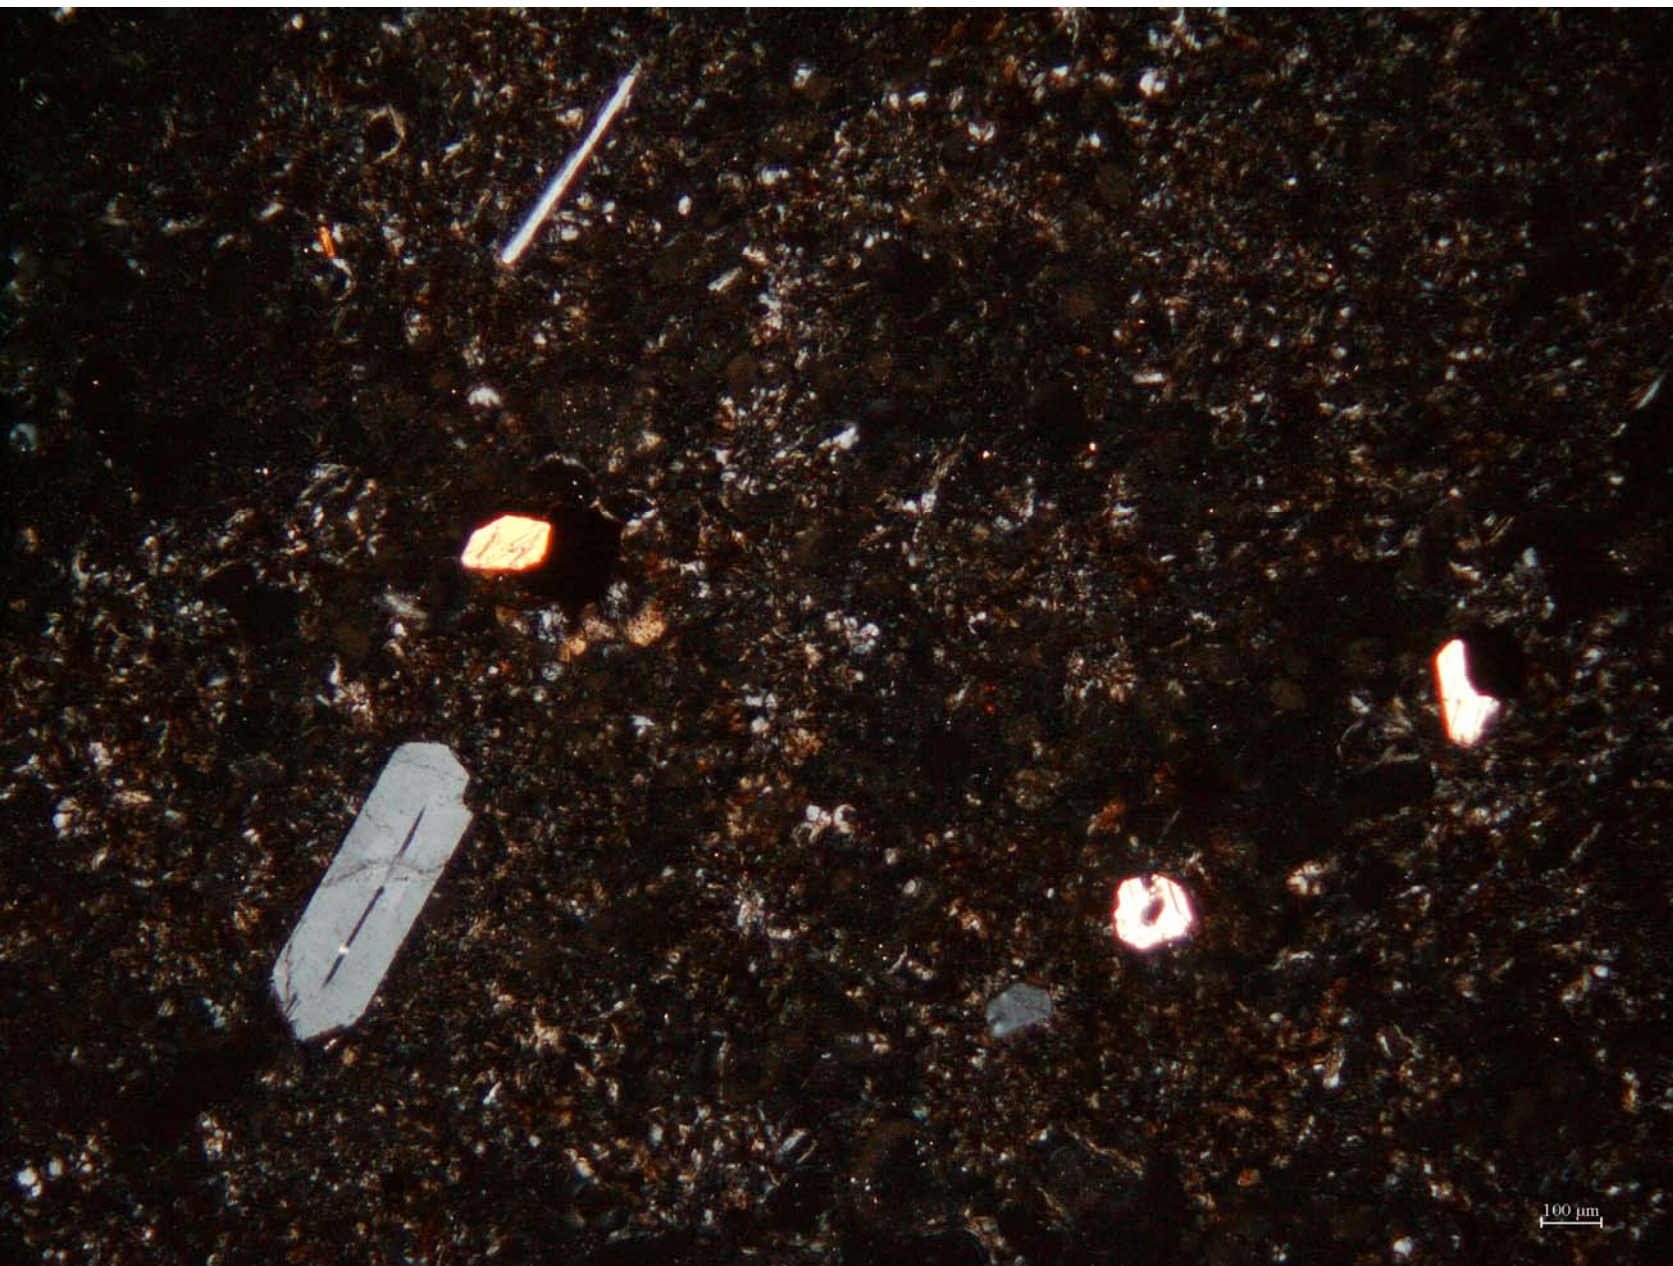

OIS0325 – c5\_5

cross polarized light



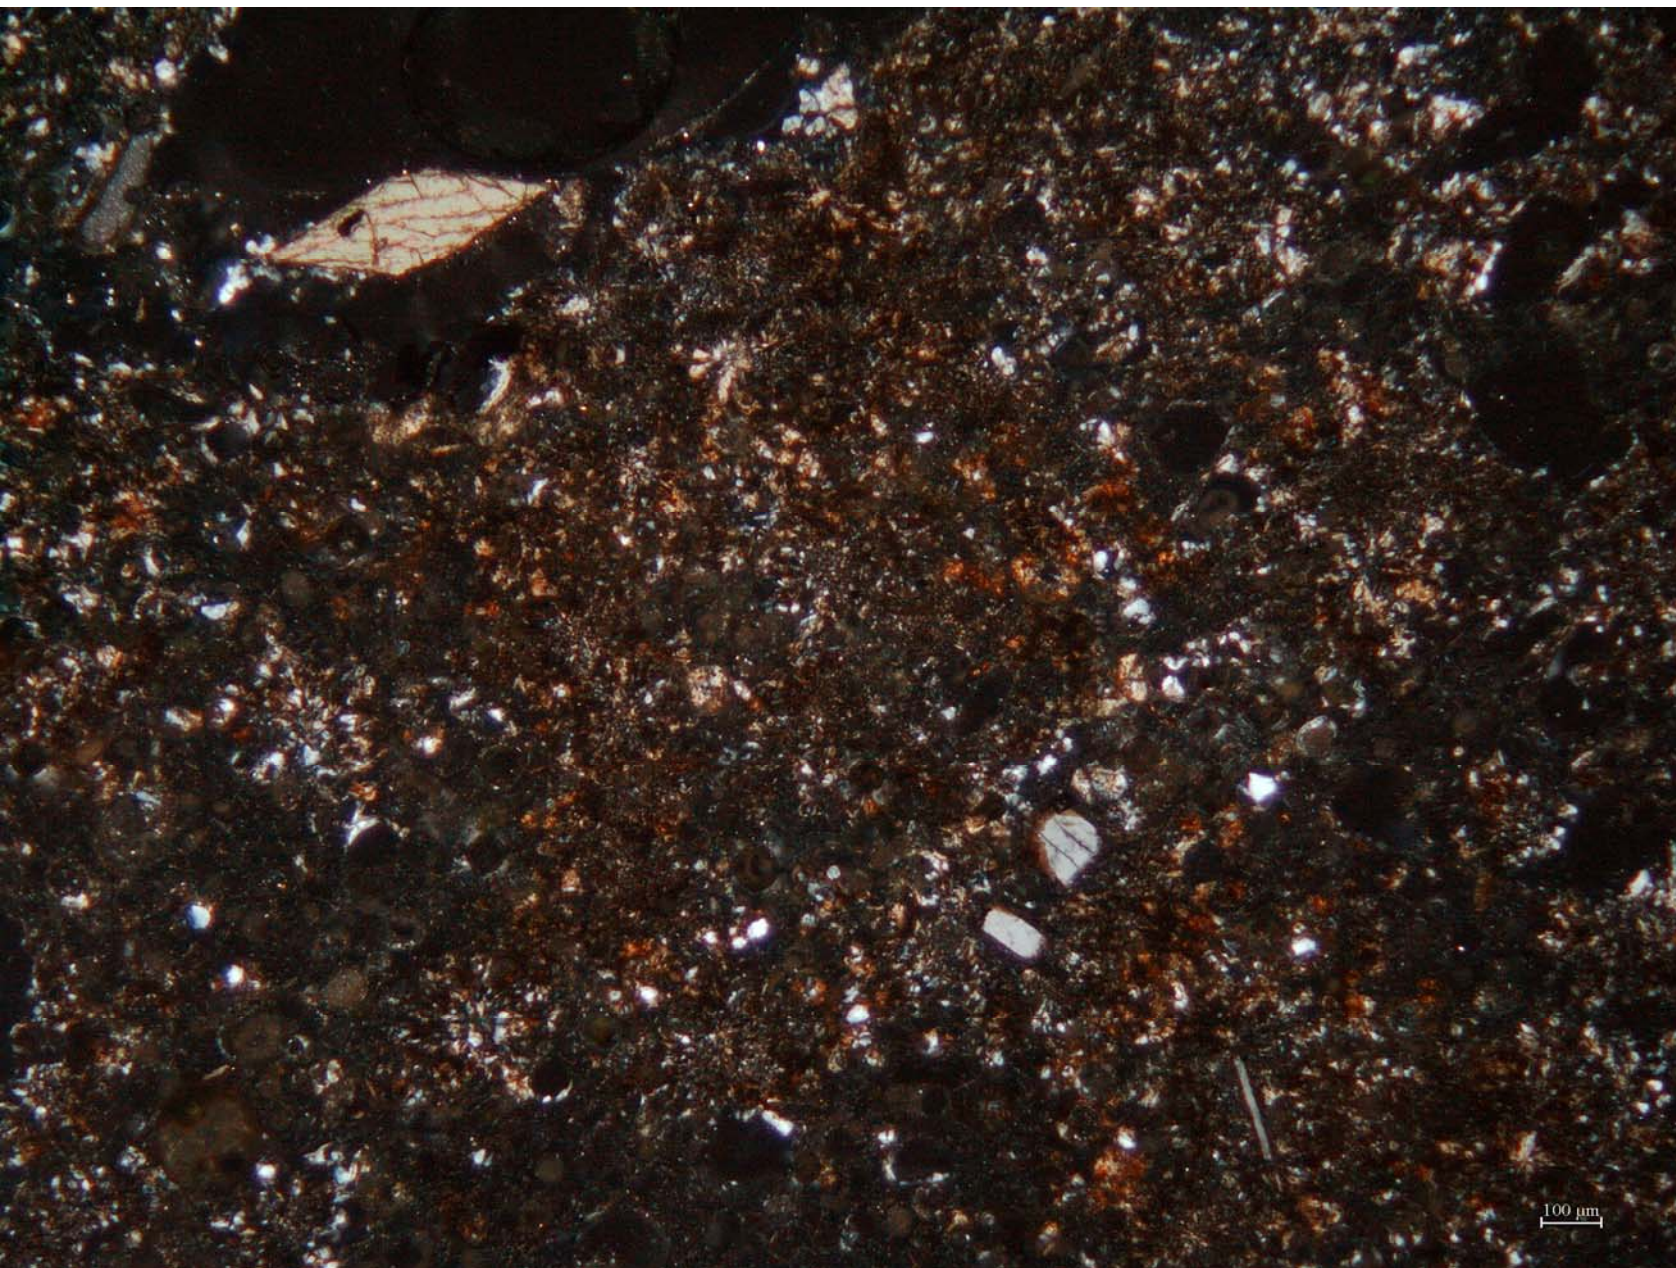

OIS0325 – c5\_6

cross polarized light



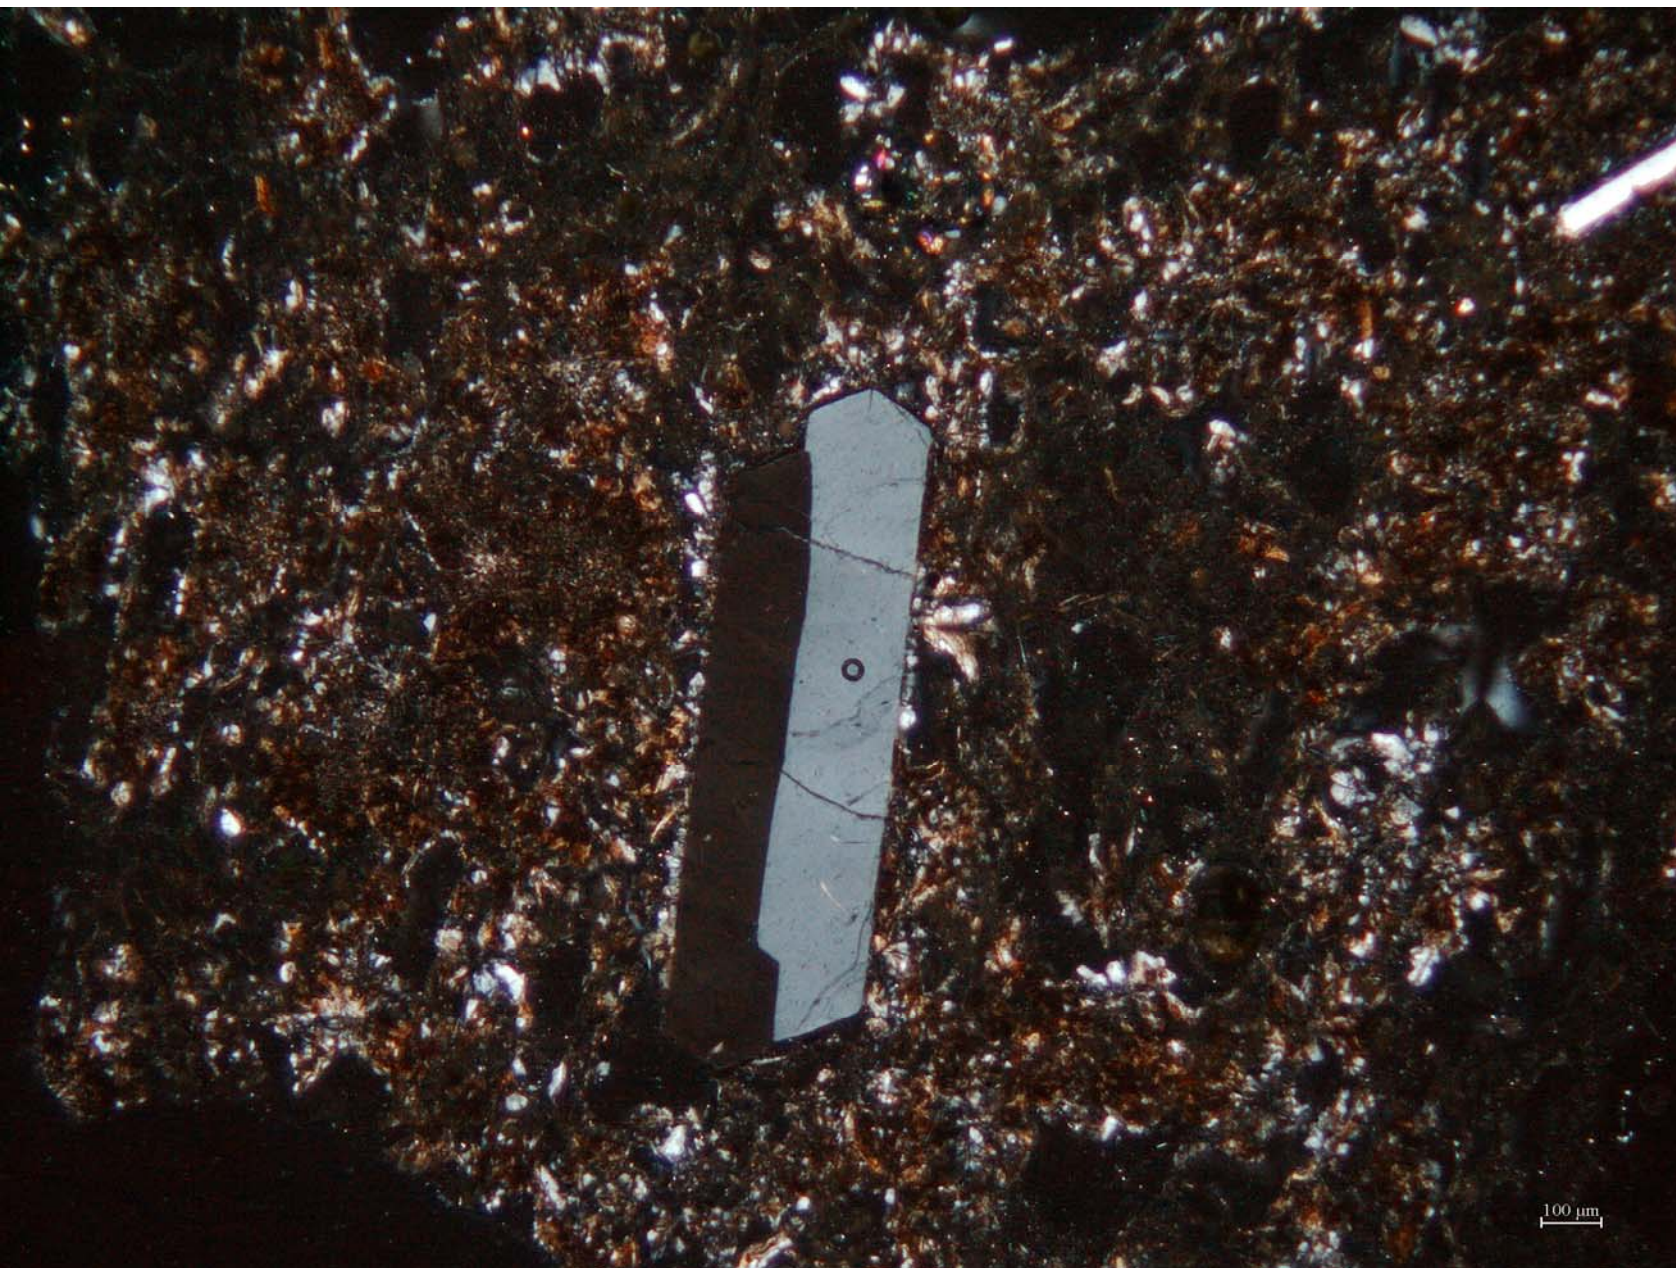

OIS0325 – c6\_1

cross polarized light



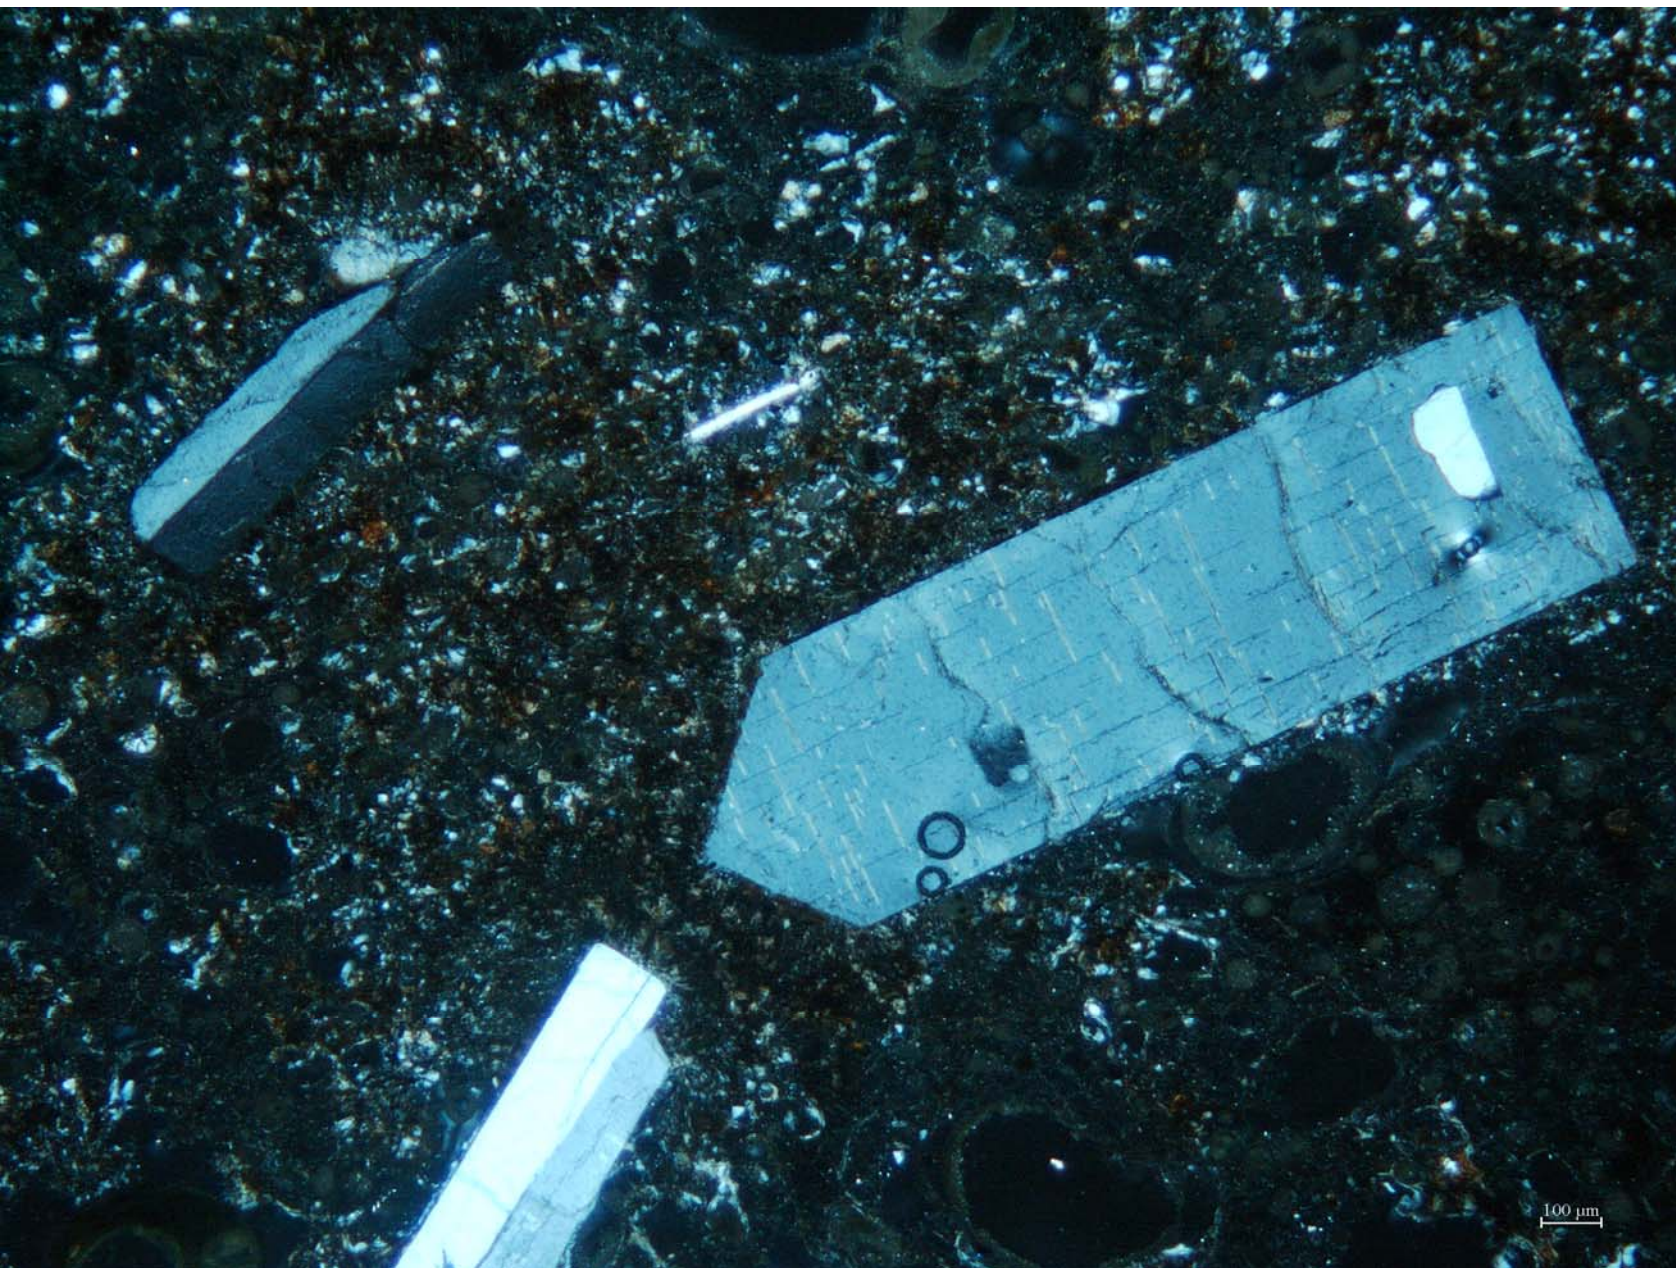

OIS0325 – c7\_1

cross polarized light



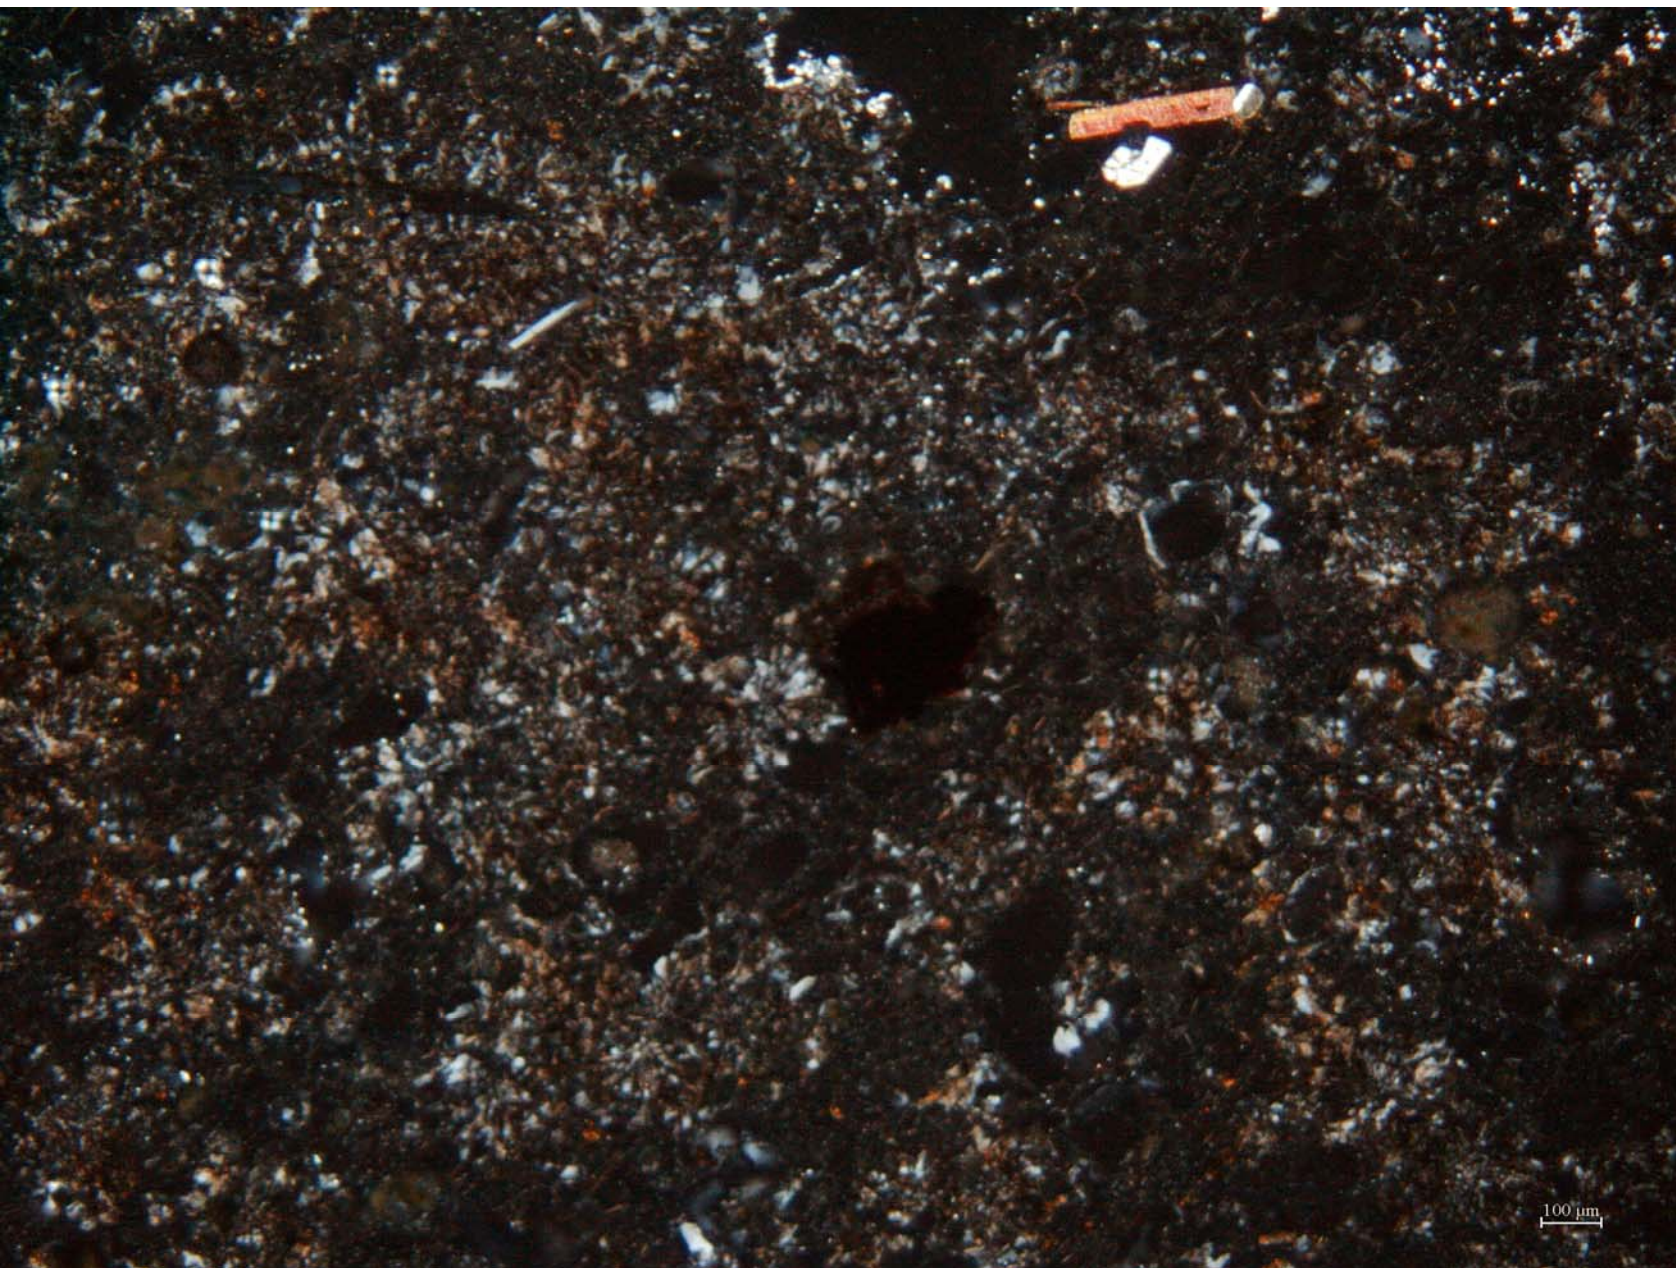

OIS0325 – c8\_1

cross polarized light



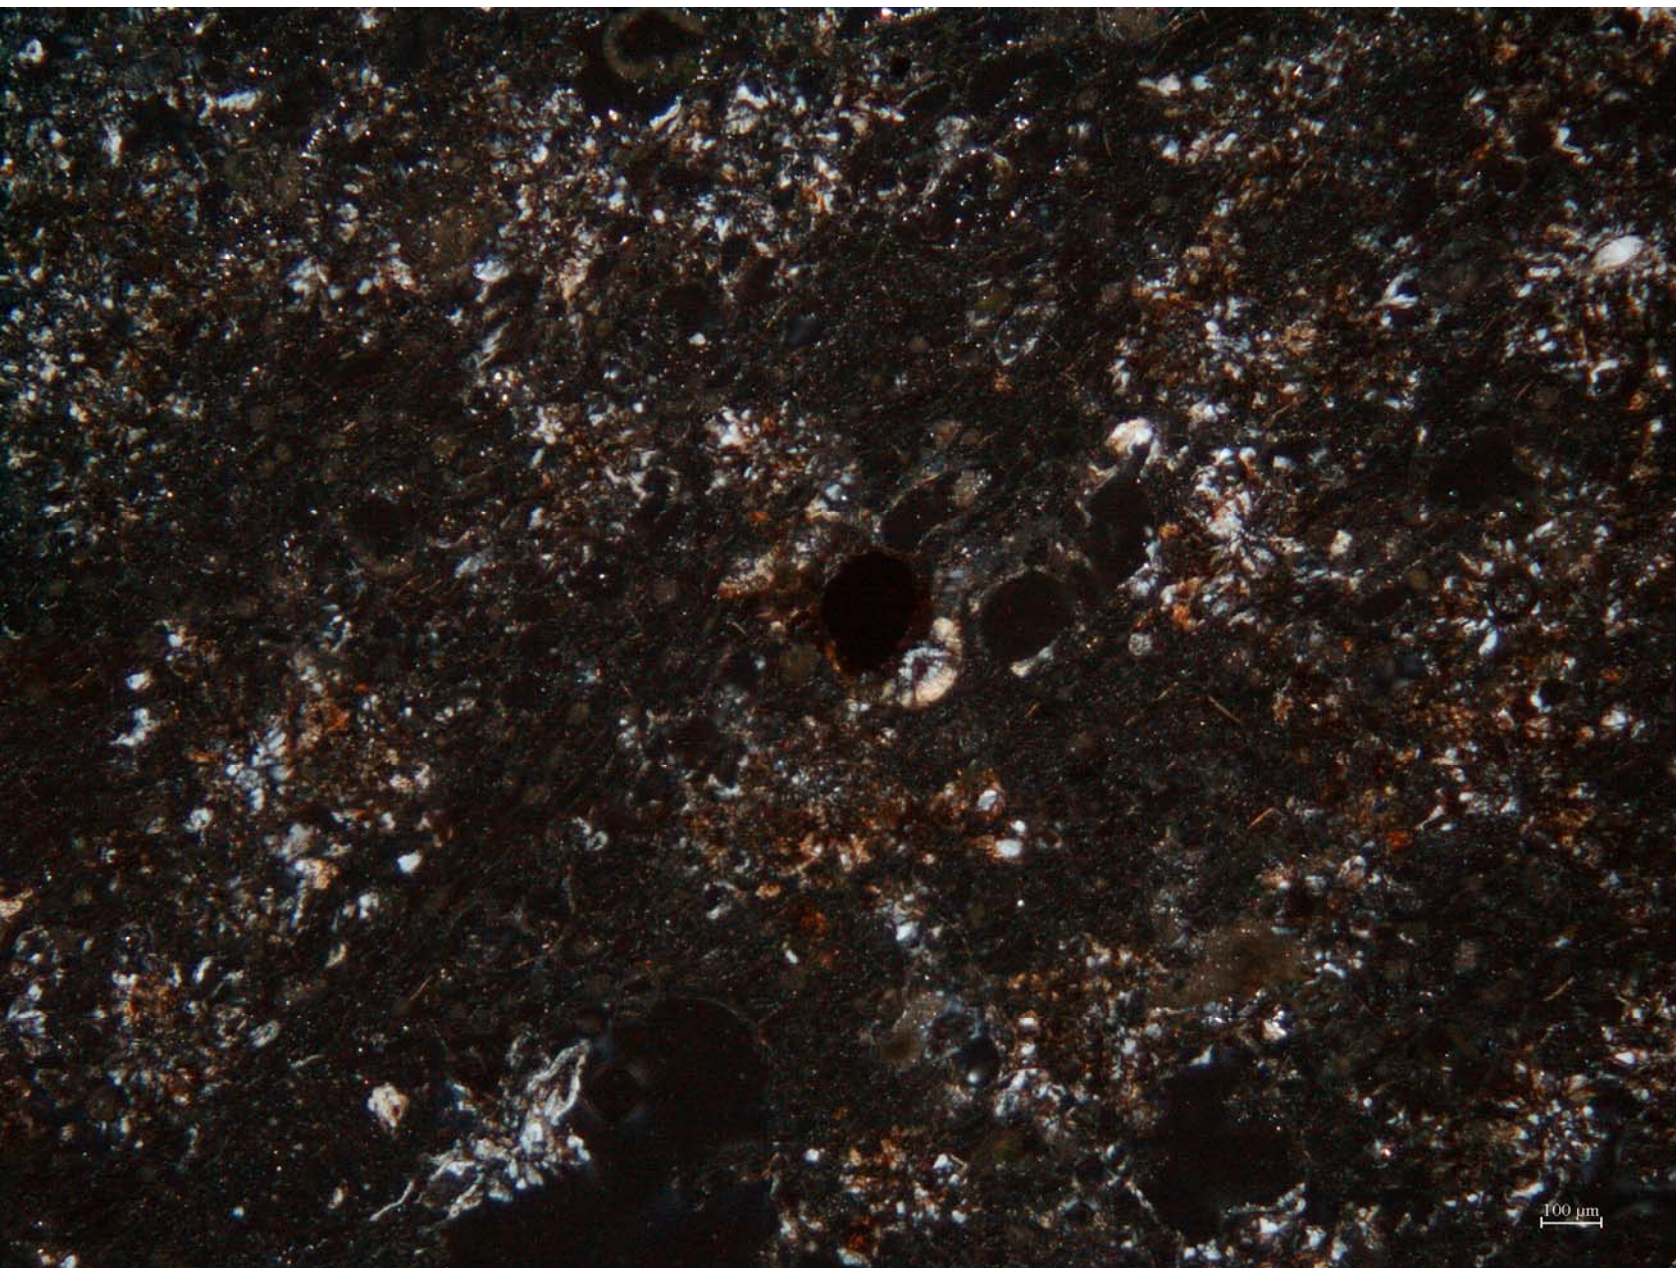

OIS0325 – c9\_1

cross polarized light



NOTE:

all the following images have been acquired at 5x magnification;  
therefore, the 100  $\mu\text{m}$  bar must be reduced by the half



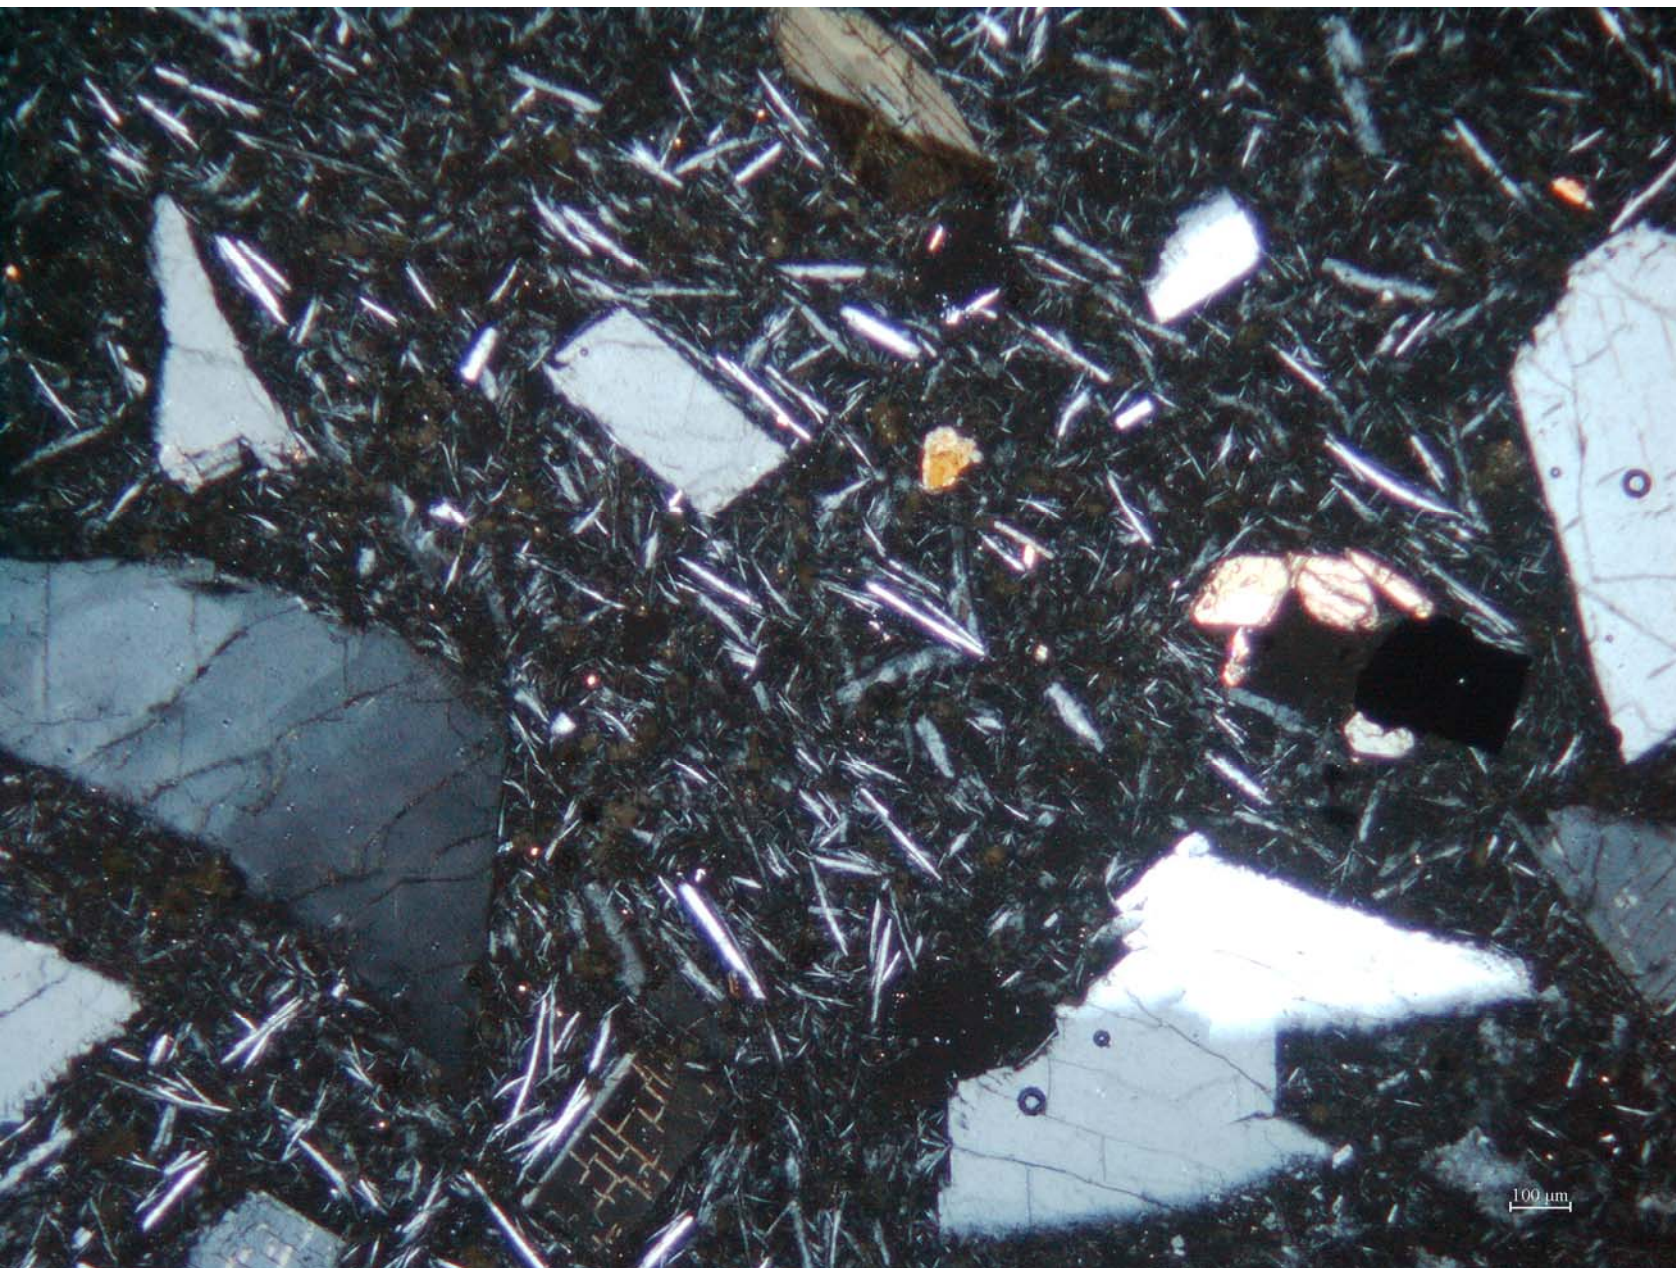

OIS0102 – c1\_1

cross polarized light



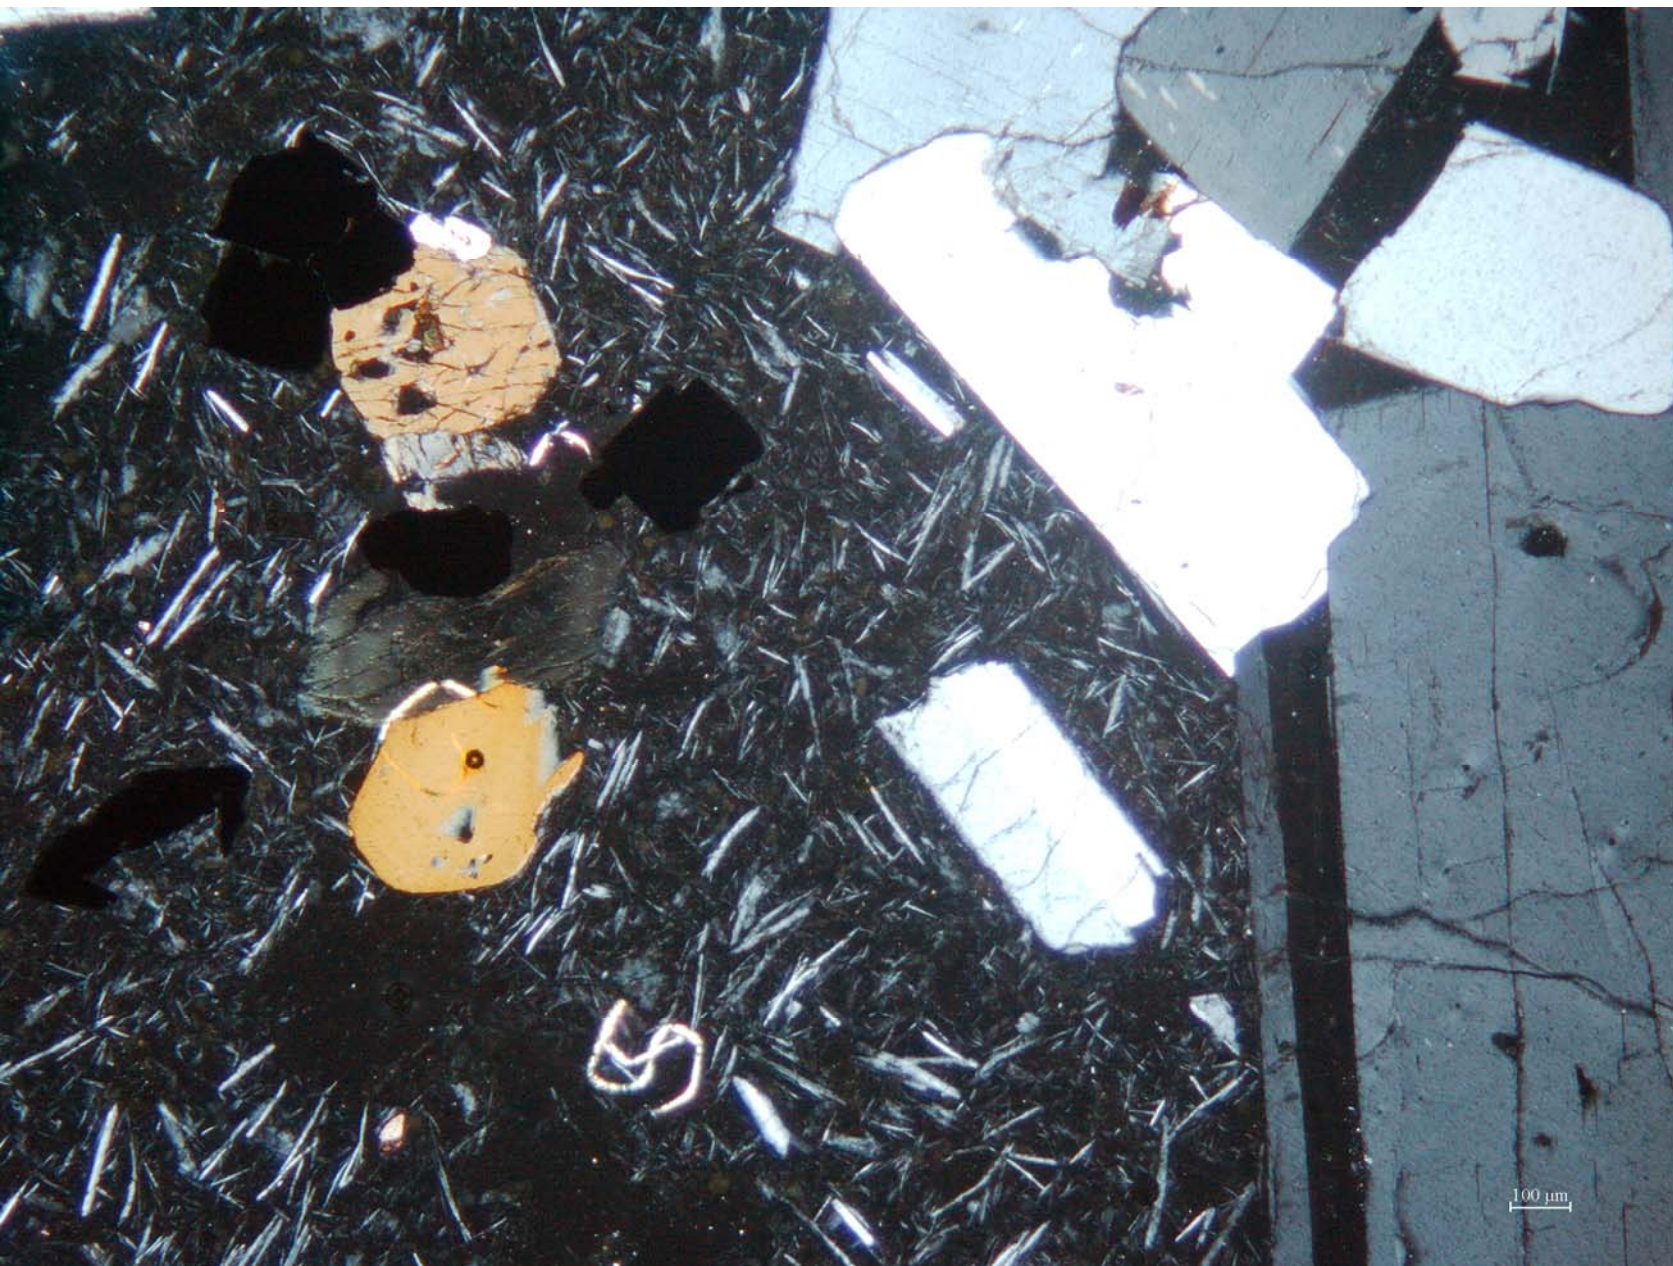

OIS0102 – c2\_1

cross polarized light



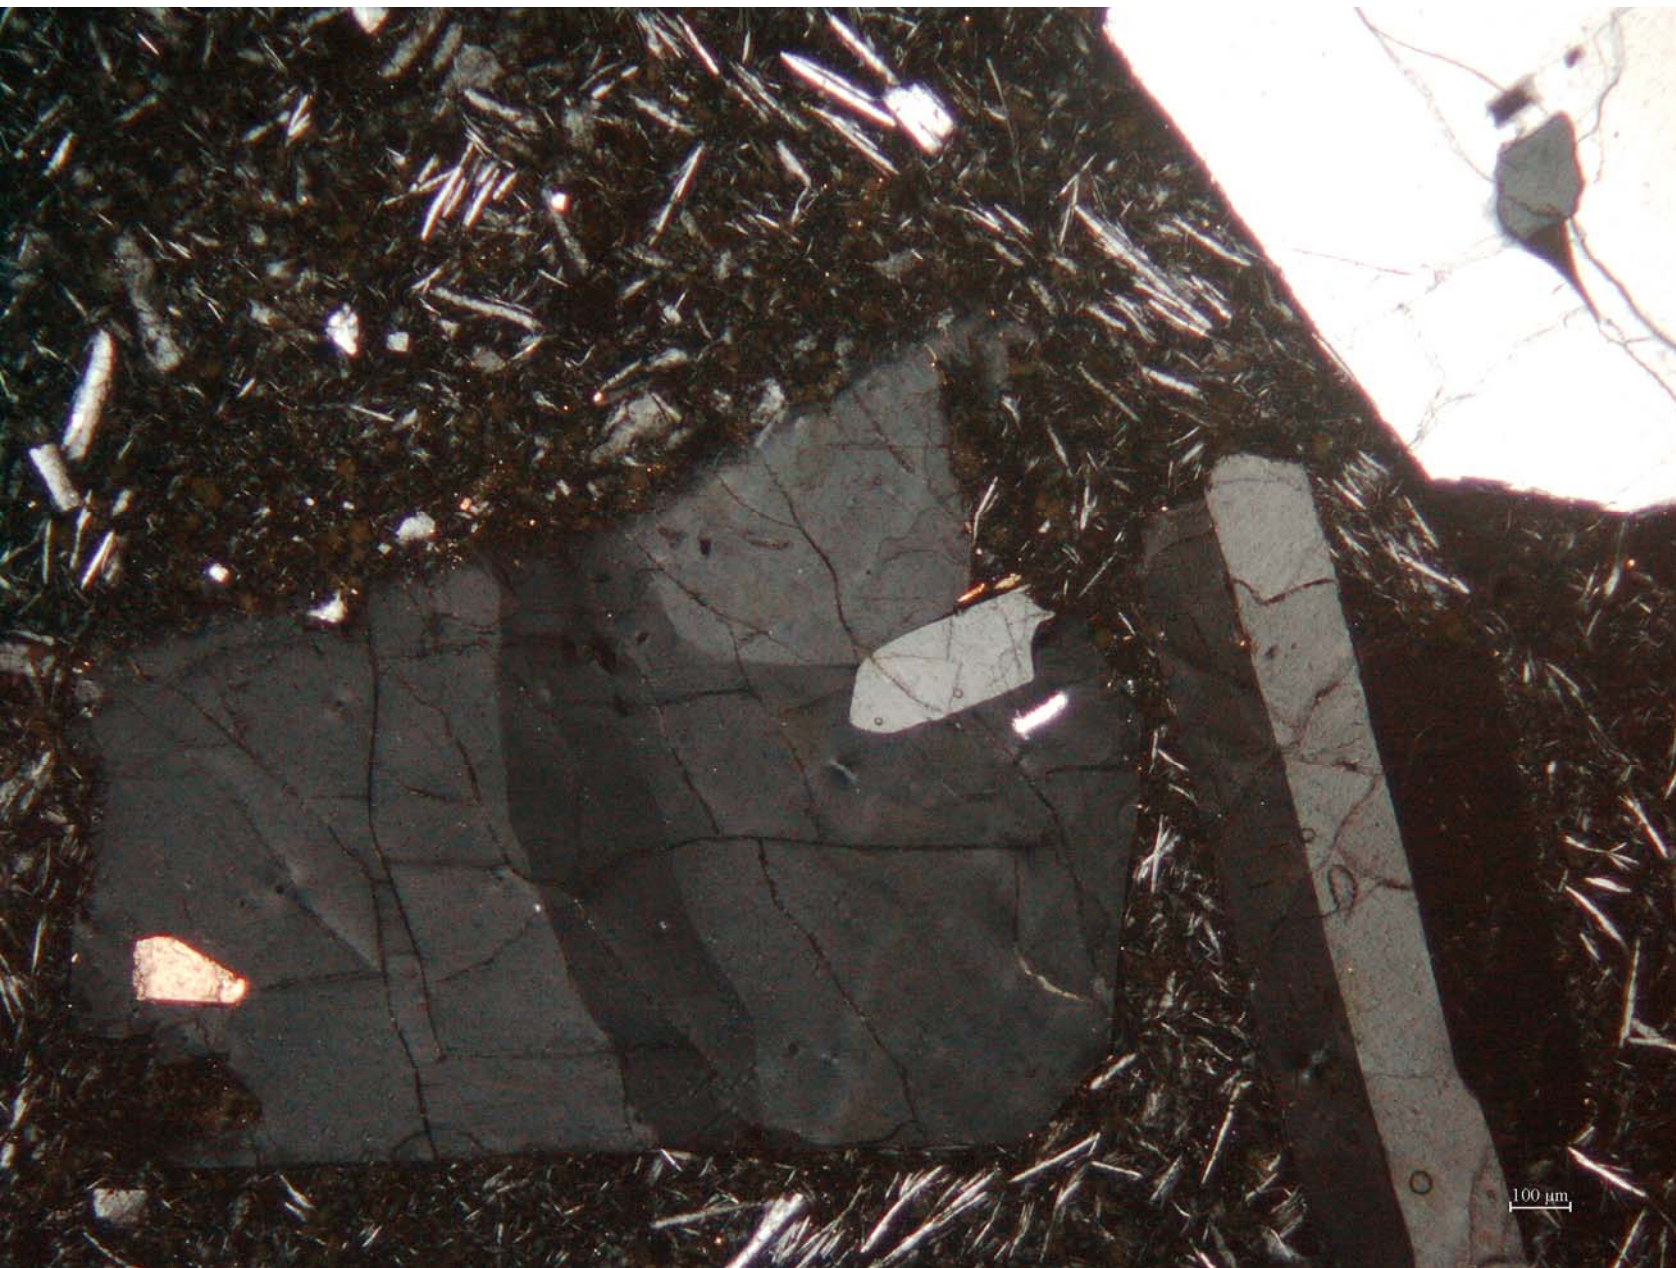

OIS0102 – c3\_1

cross polarized light



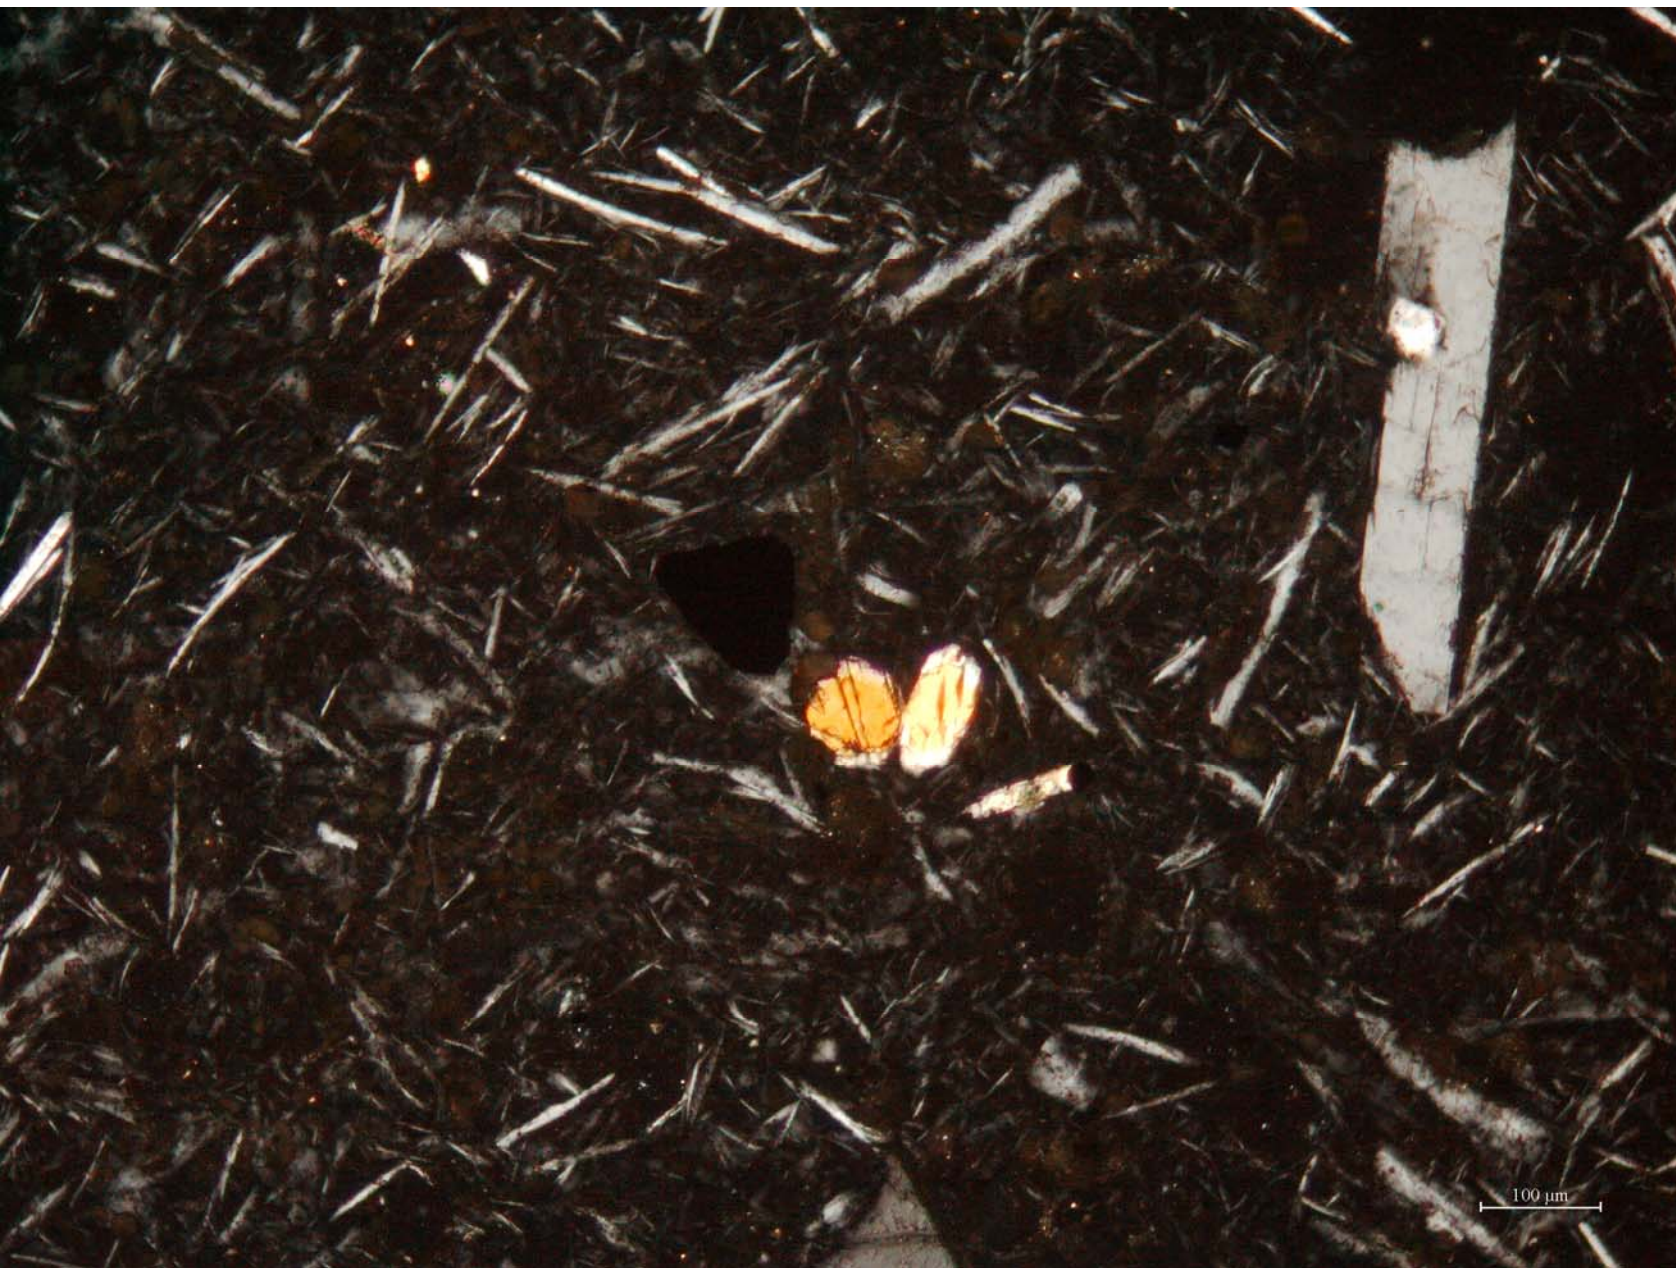

OIS0102 – c4\_1

cross polarized light



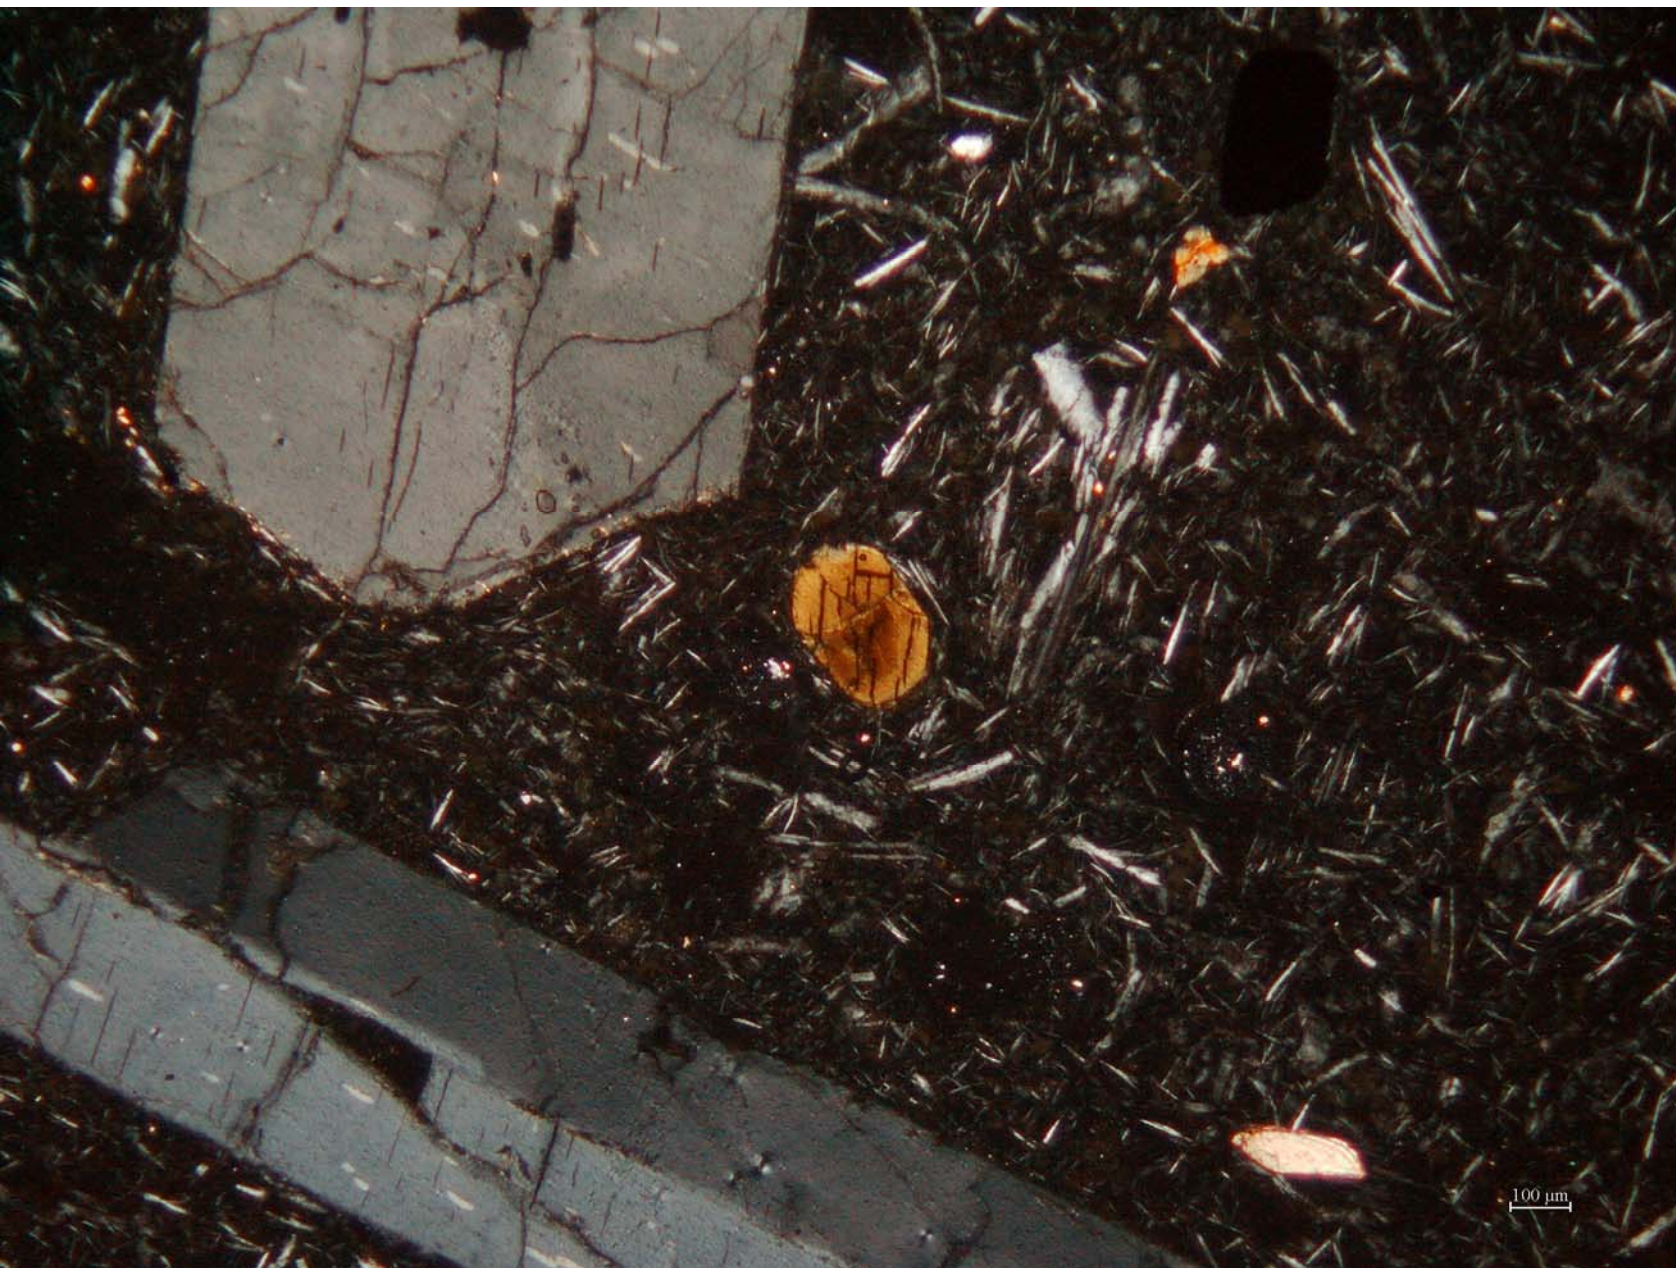

OIS0102 – c5\_1

cross polarized light



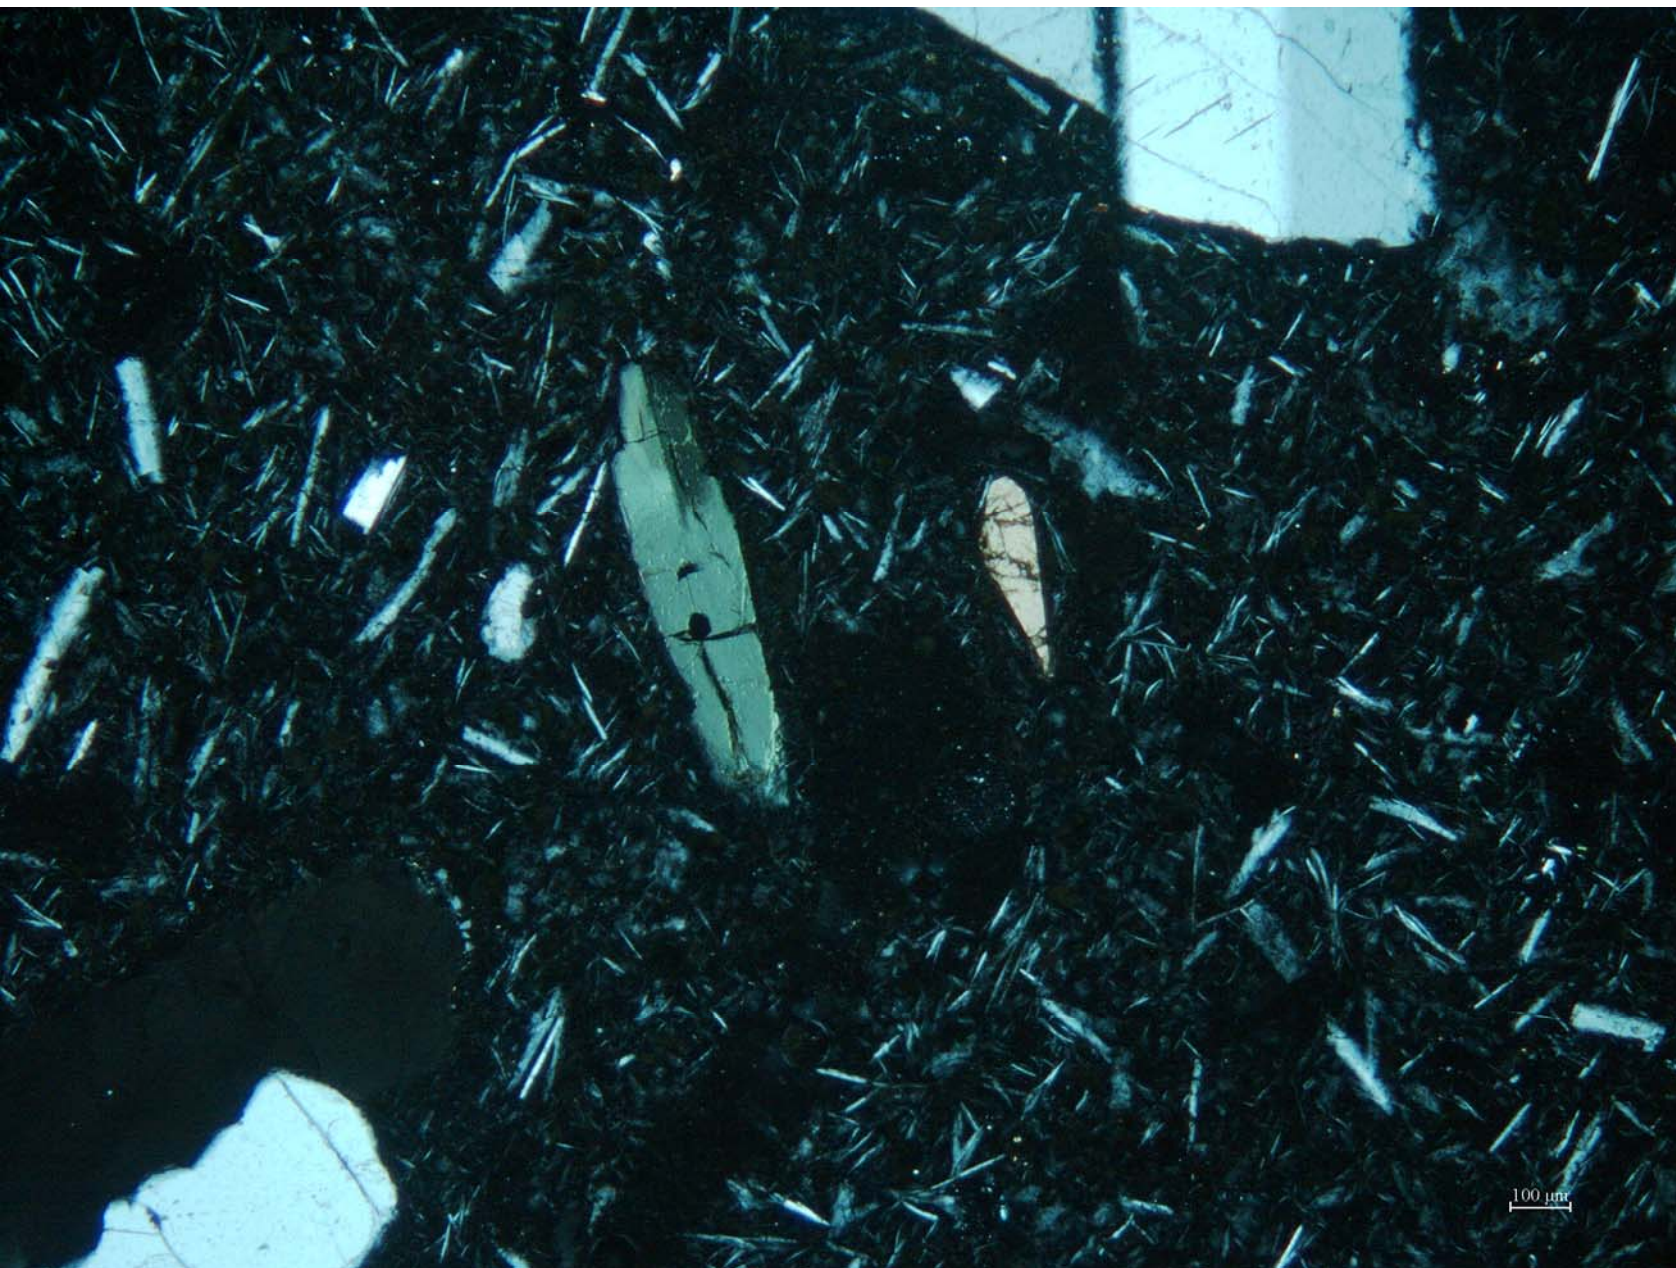

OIS0102 – c7\_1

cross polarized light



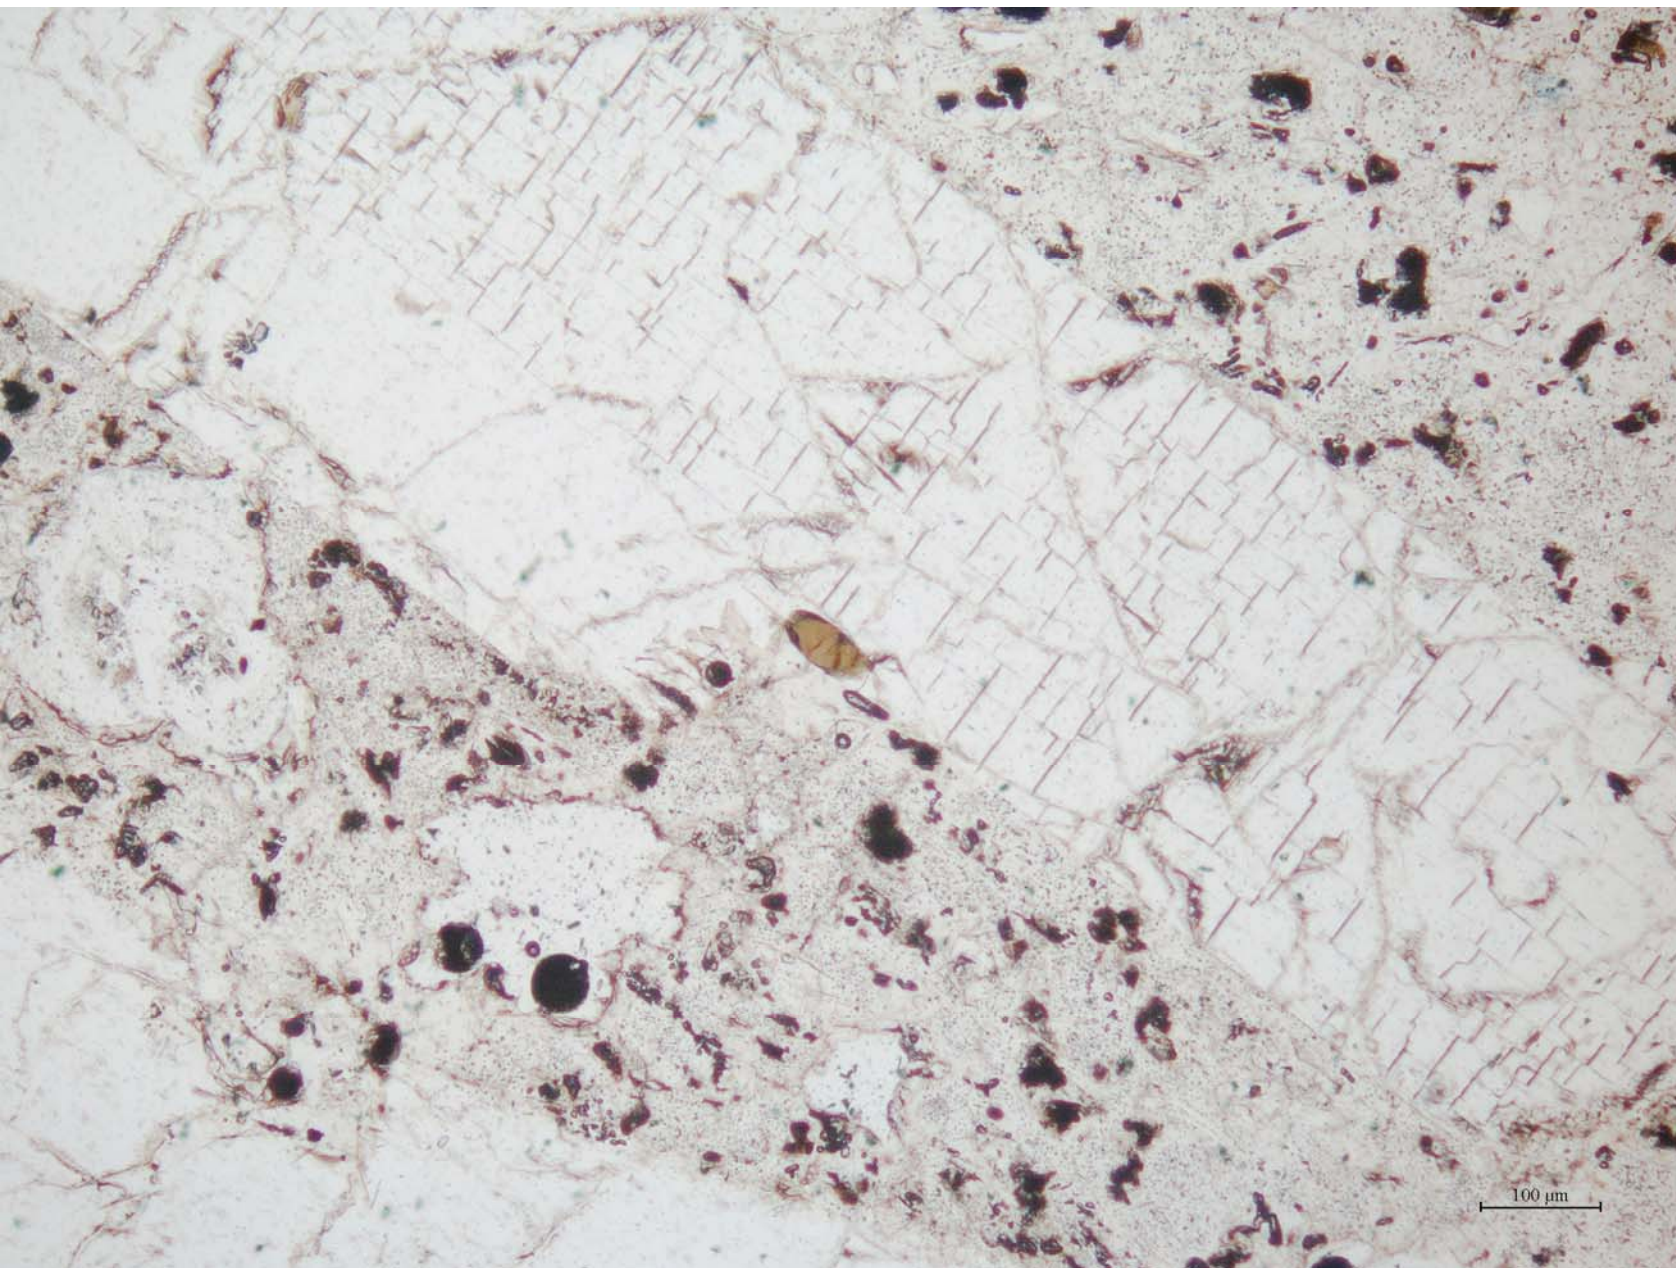

OIS0102 – c8\_1

plane polarized light



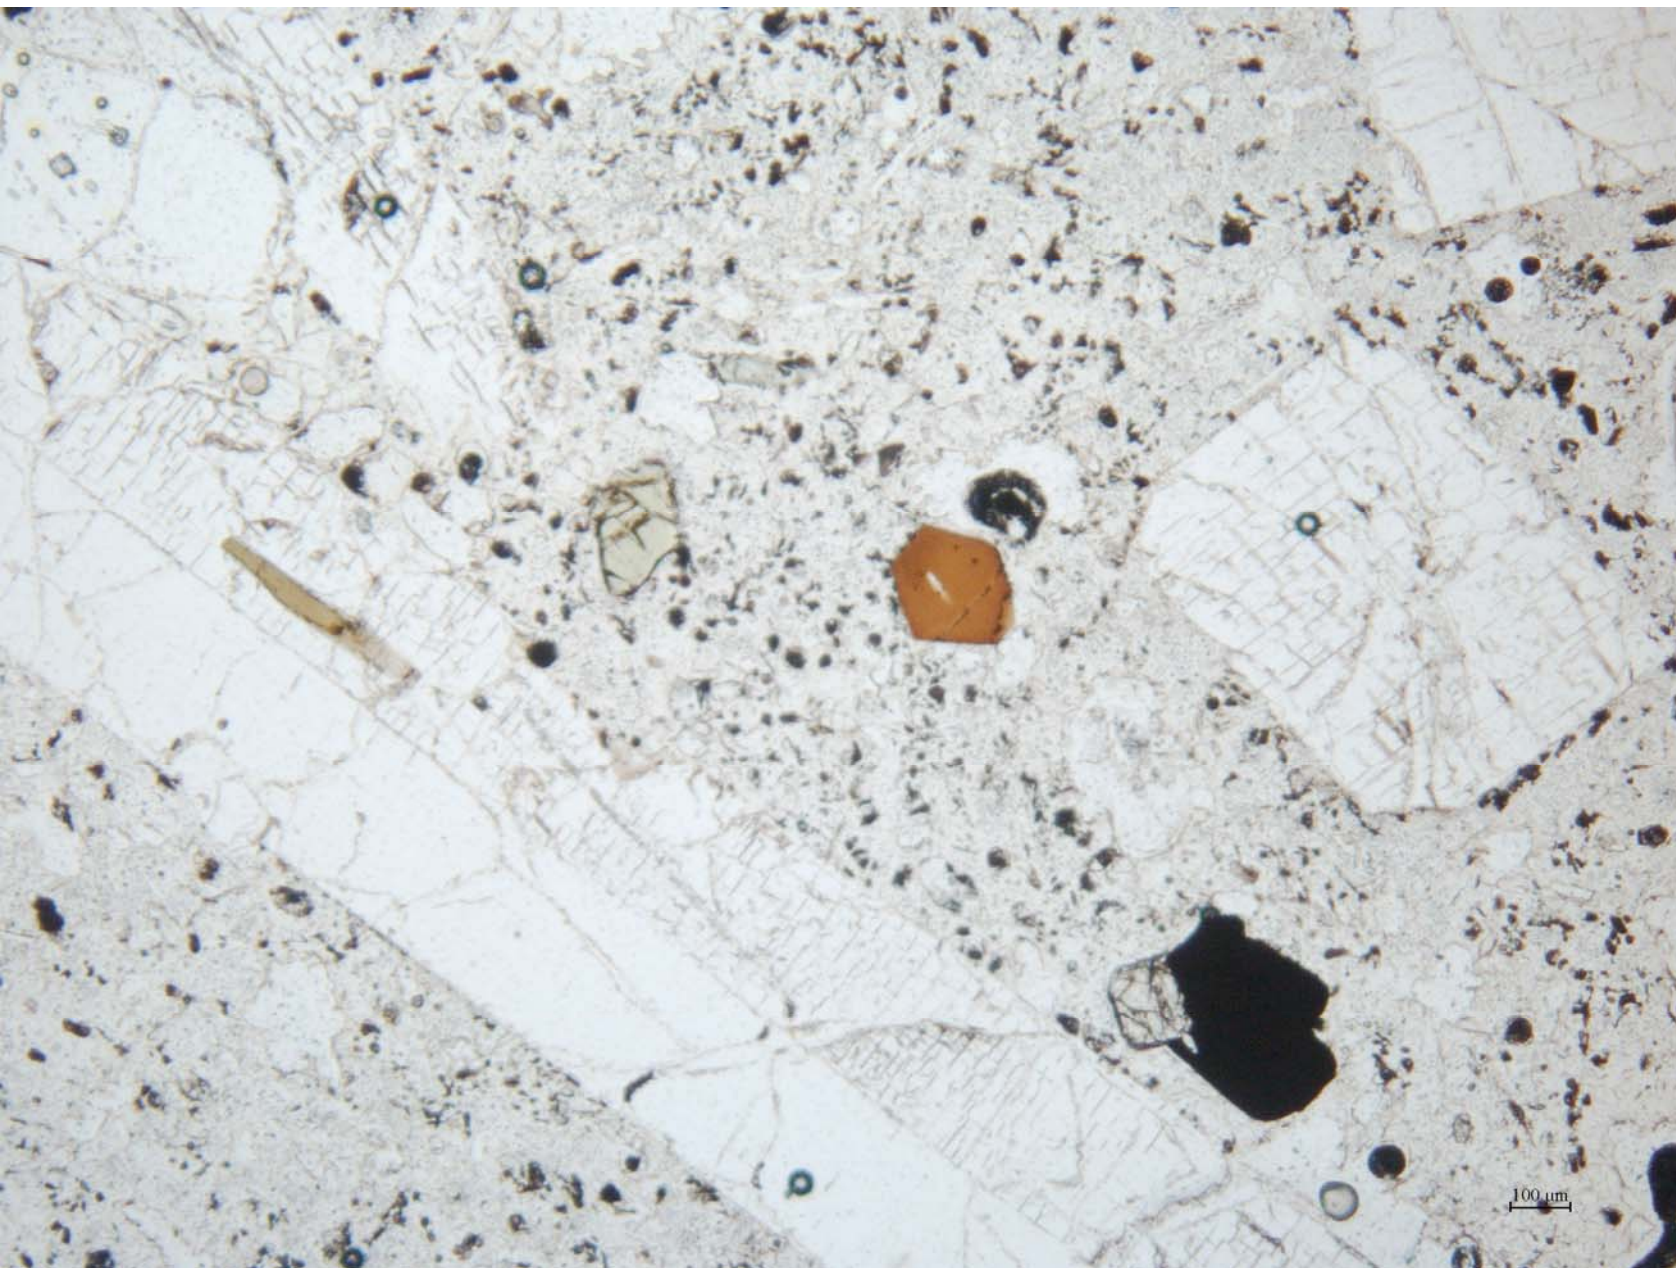

OIS0102 - c9\_1

plane polarized light
